# Supplementary material for: Biocatalysis: fungi mediated novel and selective 12β- or 17β-hydroxylation on the basic limonoid skeleton
Source: Royal Society of Chemistry journal article supplement (doi:10.1039/c3gc40193f), 2013-01-01

## Supplementary Information

# Biocatalysis: Fungi mediated Selective 12 $\beta$ or 17 $\beta$ - Hydroxylation on the Basic Limonoid Skeleton

Saikat Halder,<sup>1</sup> Swati P. Kolet<sup>1</sup> and Thulasiram H. V.\*<sup>1,2</sup>

<sup>1</sup>Chemistry-Biology Unit, Department of Organic Chemistry, CSIR-National Chemical Laboratory, Pune-411008, India. <sup>2</sup> CSIR-Institute of Genomics and Integrative Biology, Mall Road, New Delhi-110007, India.

hv.thulasiram@ncl.res.in

### Table of Contents:

#### Section A.

|                      |    |
|----------------------|----|
| Synthetic procedures | S2 |
| References           | S3 |

#### Section B.

|                                               |    |
|-----------------------------------------------|----|
| HPLC and TLC profiles                         | S4 |
| Analytical data of substrates and metabolites | S5 |

#### Section C.

|                                 |     |
|---------------------------------|-----|
| Copies of NMR and LC-MS spectra | S21 |
|---------------------------------|-----|

## Section A. Synthetic procedures:

### 2.1. Synthesis of 1,2-Dihydroazadiradione (**4**) and 1,2-Dihydroepoxyazadiradione (**12**):<sup>1</sup>

500 mg Azadiradione (**1**) (1.1 mmol) in 60 ml HPLC grade methanol was stirred with 45 mg 10% Pd on activated carbon under 2 atmosphere pressure of hydrogen. After 10 hours, the reaction mixture was filtered through celite bed and chromatographed on silica gel (230-400 mesh) column using a gradient mixture of methanol/dichloromethane as eluent to get 392 mg of desired 1,2-dihydroazadiradione (**4**) ( 0.87 mmol, yield ~ 78 %) (eluted at 0.6 % methanol in dichloromethane). Similarly, 1,2-Dihydroepoxyazadiradione (**12**) ( 436 mg, 0.93 mmol) was prepared from the hydrogenation of epoxyazadiradione (**10**) ( 500 mg, 1.07 mmol) with a yield of ~ 87 %.

### 2.2. Synthesis of Nimbocinol (**14**) and 7-Deacetylepoxiazadiradione (**17**):<sup>2</sup>

500 mg Azadiradione (**1**) (1.1. mmol), dissolved in minimum amount of methanol was added by 200 ml saturated solution of K<sub>2</sub>CO<sub>3</sub> and stirred for 18 hours at room temperature. Since it was showing a complete consumption of azadiradione and formation of a more polar spot on TLC, the reaction mixture was neutralised to pH ~7.0 using 1(N) HCl and then methanol was concentrated in aspirator at 40°C. Further, the mass was partitioned between brine solution and EtOAc. The EtOAc layer was concentrated, dried over Na<sub>2</sub>SO<sub>4</sub> and 290 mg of pure nimbocinol (**14**) (0.71 mmol, yield ~ 64 %) was obtained after purification over silica gel (230-400 mesh) column at 0.8% methanol in dichloromethane. Similarly 7-deacetylepoxiazadiradione (**17**) (280 mg, 0.66 mmol) was synthesised from epoxyazadiradione (**10**) (500 mg, 1.07 mmol) with a yield of 62 %.

### 2.3. Synthesis of 1,2-Epoxyazadiradione (**7**):<sup>3</sup>

500 mg Azadiradione (1.1. mmol) in 65 ml methanol was stirred for 5 hours after addition of 20 drops of 5 % aqueous NaOH followed by 20 ml of 30 % H<sub>2</sub>O<sub>2</sub>. The reaction mixture was concentrated in vaccum at 50°C and then extracted with dichloromethane (3 x 50 mL). The dichloromethane layer was dried over Na<sub>2</sub>SO<sub>4</sub> and concentrated to get 498 mg 1,2-epoxyazadiradione (1.06 mmol, yield ~ 96 %) .

#### 2.4. Synthesis of Gedunin (**19**):<sup>1</sup>

500 mg Epoxyzadiradione (**10**) (1.07 mmol) was taken in 10 ml HPLC grade dichloromethane and to that 615 mg (2.14 mmol) 60 % m-chloroperbenzoic acid and 180 mg (2.14 mmol) sodium bicarbonate was added sequentially. The reaction mixture was stirred at room temperature for 1 hour to observe the complete conversion of epoxyzadiradione to gedunin on TLC and then the organic reaction mixture was washed with saturated aqueous solution of sodium bicarbonate for thrice (1:3 v/v). Dichloromethane layer was further dried over Na<sub>2</sub>SO<sub>4</sub>, concentrated and 395 mg gedunin (**19**) (0.82 mmol, yield ~76 %) was purified from silica gel flash column chromatography using 0.4 % methanol/dichloromethane as an eluent.

#### References:

- (1) Lavie, D.; Levy, E. C.; Jain, M. K. *Tetrahedron* **1971**, *27*, 3927-&.
- (2) Siddiqui, B. S.; Rasheed, M.; Faizi, S.; Firdous; Ali, S. T.; Tariq, R. M.; Naqvi, S. *Helv. Chim. Acta* **2003**, *86*, 3342-3353.
- (3) Hallur, G.; Sivramakrishnan, A.; Bhat, S. V. *J. Nat. Prod.* **2002**, *65*, 1177-1179.

## Section B. HPLC and TLC profiles

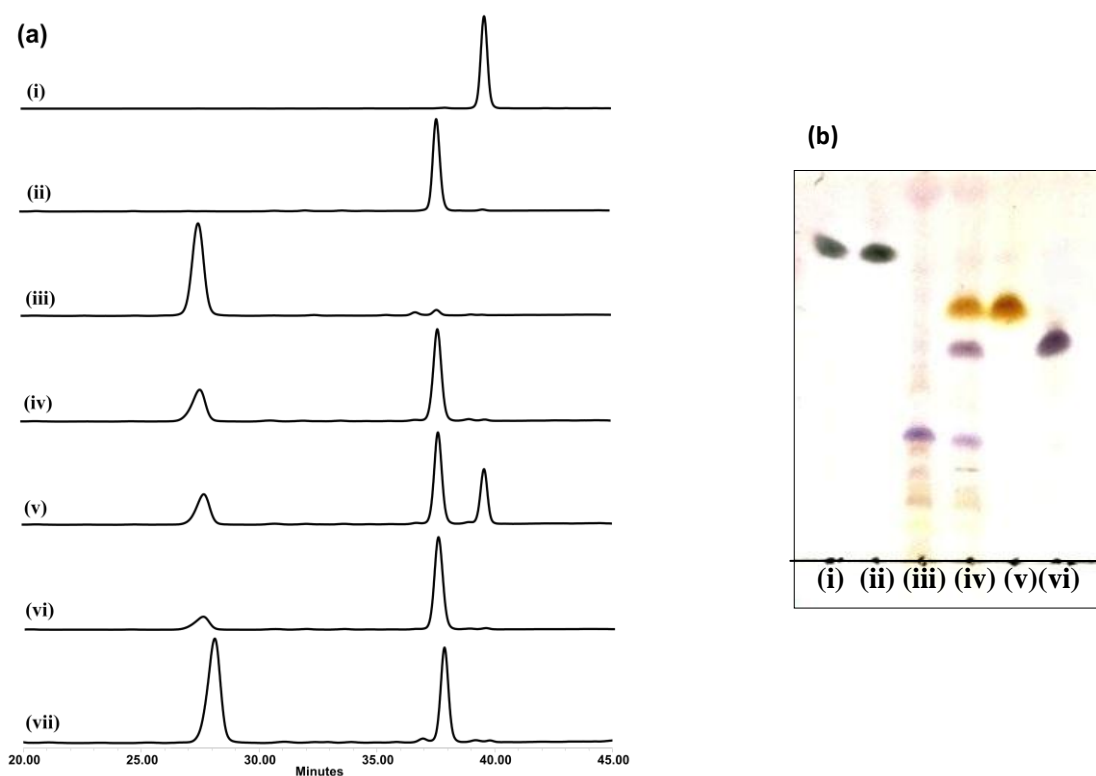

**ESI-Fig.1 (a)** HPLC separation of the biotransformation products obtained by incubating azadiradione (**1**) with *M881* for 8 days and coinjection studies: **(i)** Standard azadiradione, **(ii)** Purified **2**, **(iii)** Purified **3**, **(iv)** Fermented azadiradione (**1**) with *M881*, **(v)** Co-injection of **1** with **(iv)**, **(vi)** Co-injection of **2** with **(iv)**, **(vii)** Co-injection of **3** with **(iv)**; **(b)** Thin-layer chromatography: lane **(i)** Standard azadiradione, lane **(ii)** Substrate control, lane **(iii)** Organism control, lane **(iv)** Fermented azadiradione with *M881*, lane **(v)** Purified **2**, lane **(vi)** Purified **3**.

## Analytical data of substrates and metabolites

**ESI-Table 1.**  $^1\text{H}$  and  $^{13}\text{C}$  NMR chemical shift values for C-12 and C-17 for substrates and metabolites

| Compound                                                         | C-12                                         |                                           | C-17                                          |                                           |
|------------------------------------------------------------------|----------------------------------------------|-------------------------------------------|-----------------------------------------------|-------------------------------------------|
|                                                                  | $^1\text{H}$ $\delta_{\text{H}}$ (ppm)(H-12) | $^{13}\text{C}$ $\delta_{\text{C}}$ (ppm) | $^1\text{H}$ $\delta_{\text{H}}$ (ppm) (H-17) | $^{13}\text{C}$ $\delta_{\text{C}}$ (ppm) |
| Azadiradione ( <b>1</b> )                                        | - <sup>a</sup>                               | 30.36                                     | 3.43 (s)                                      | 60.76                                     |
| 17 $\beta$ -hydroxyazadiradione ( <b>2</b> )                     | - <sup>a</sup>                               | 22.20                                     | $\times^b$                                    | 80.56                                     |
| 12 $\beta$ -hydroxyazadiradione ( <b>3</b> )                     | 4.05 (br. d, $J= 7.3$ Hz)                    | 68.37                                     | 4.31 (s)                                      | 52.38                                     |
| 1,2-dihydroazadiradione ( <b>4</b> )                             | - <sup>a</sup>                               | 30.22                                     | 3.39 (s)                                      | 60.57                                     |
| 17 $\beta$ -hydroxy-1,2-dihydroazadiradione ( <b>5</b> )         | - <sup>a</sup>                               | 22.03                                     | $\times^b$                                    | 80.59                                     |
| 12 $\beta$ -hydroxy-1,2-dihydroazadiradione ( <b>6</b> )         | 4.03 (br. d, $J= 6.7$ Hz)                    | 68.21                                     | 4.28 (s)                                      | 52.25                                     |
| 1,2 $\alpha$ -epoxyazadiradione ( <b>7</b> )                     | - <sup>a</sup>                               | 30.03                                     | 3.41 (s)                                      | 60.55                                     |
| 17 $\beta$ -hydroxy-1,2 $\alpha$ -epoxyazadiradione ( <b>8</b> ) | - <sup>a</sup>                               | 21.88                                     | $\times^b$                                    | 80.63                                     |
| 12 $\beta$ -hydroxy-1,2 $\alpha$ -epoxyazadiradione ( <b>9</b> ) | 4.10 (dd, $J= 7.3, 2.4$ Hz)                  | 68.14                                     | 4.30 (s)                                      | 52.32                                     |
| Epoxyazadiradione ( <b>10</b> )                                  | - <sup>a</sup>                               | 29.09                                     | 3.90 (s)                                      | 50.94                                     |
| 12 $\beta$ -hydroxyepoxyazadiradione ( <b>11</b> )               | 3.95 (dd, $J= 8.4, 4.9$ Hz)                  | 70.66                                     | 4.48 (s)                                      | 44.89                                     |
| 1,2-dihydroepoxyazadiradione ( <b>12</b> )                       | - <sup>a</sup>                               | 28.66                                     | 3.88 (s)                                      | 50.80                                     |
| 12 $\beta$ -hydroxy-1,2-dihydroepoxyazadiradione ( <b>13</b> )   | 3.93 (m)                                     | 70.67                                     | 4.49 (s)                                      | 44.79                                     |
| Nimbocinol ( <b>14</b> )                                         | - <sup>a</sup>                               | 30.29                                     | 3.43 (s)                                      | 60.68                                     |
| 17 $\beta$ -hydroxynimbocinol ( <b>15</b> )                      | - <sup>a</sup>                               | 22.14                                     | $\times^b$                                    | 80.76                                     |
| 7-Deacetylepoxiazadiradione ( <b>17</b> )                        | - <sup>a</sup>                               | 29.69                                     | 3.90 (s)                                      | 51.23                                     |
| 12 $\beta$ -hydroxy-7-deacetylepoxiazadiradione ( <b>18</b> )    | 3.93 (m)                                     | 71.14                                     | 4.50 (s)                                      | 45.08                                     |
| Gedunin ( <b>19</b> )                                            | - <sup>a</sup>                               | 26.02                                     | 5.62 (s)                                      | 78.26                                     |
| 12 $\beta$ -hydroxygedunin ( <b>20</b> )                         | 3.94 (br. d, $J= 7.6$ Hz)                    | 69.22                                     | 6.18 (s)                                      | 75.57                                     |

<sup>a</sup> Chemical shift is less than 2.8 ppm and appears in the overlapping region. <sup>b</sup> Quaternary carbon.

Azadiradione (1):

White solid;  $[\alpha]_D^{28} = +29.6$  (*c* 2.00, CHCl<sub>3</sub>); UV (Me<sub>2</sub>CO)  $\lambda_{\max} = 211$  nm.

**LC-ESI-MS** (m/z): 473.2 ([M+Na]<sup>+</sup>), 451.2 ([M+H]<sup>+</sup>), 391.2 ([M-OAc]<sup>+</sup>).

**MALDI-TOF** (m/z): 473.2273 ([M+Na]<sup>+</sup>) (Calculated: 473.2303).

**IR** (CHCl<sub>3</sub>)  $\nu_{\max}$  (cm<sup>-1</sup>): 1738 (Acetate carbonyl), 1702 (D ring ketone), 1668 (A ring ketone), 1598 (D ring tri-substituted double bond), 1383 (A ring geminal methyls), 1240 (Acetate C-O), 1148, 1027, 874 (Furan ring).

**<sup>1</sup>H NMR** (400 MHz, CDCl<sub>3</sub>);  $\delta$ (ppm): 7.48 (1H, m, H-21), 7.44 (1H, m, H-23), 7.14 (1H, d, J=10.18 Hz, H-1), 6.28 (1H, m, H-22), 5.90 (1H, d, J=10.18 Hz, H-2), 5.89 (1H, s, H-15), 5.33 (1H, m, H-7), 3.43 (1H, s, H-17), 2.50 (1H, m, H-9), 2.21 (1H, m, H-5), 1.96 (3H, s, -COCH<sub>3</sub>), 1.35 (3H, s, H-30), 1.26 (3H, s, H-19), 1.11 (3H, s, H-29), 1.10 (3H, s, H-28), 1.04 (3H, s, H-18).

**<sup>13</sup>C NMR** (100 MHz, CDCl<sub>3</sub>);  $\delta$ (ppm): 204.96 (C-16), 203.96 (C-3), 192.24 (C-14), 169.58 (C-COCH<sub>3</sub>), 156.67 (C-1), 142.80 (C-23), 141.67 (C-21), 125.96 (C-2), 123.33 (C-15), 118.44 (C-20), 111.13 (C-22), 73.92 (C-7), 60.76 (C-17), 47.97 (C-13), 46.15 (C-5), 44.56 (C-8), 44.09 (C-4), 40.01 (C-10), 38.23 (C-9), 30.36 (C-12), 27.00 (C-28), 26.45 (C-18), 26.30 (C-30), 23.46 (C-6), 21.28 (C-29), 20.95 (C-COCH<sub>3</sub>), 19.02 (C-19), 15.83 (C-11).

17 $\beta$ -Hydroxyazadiradione (2):

White solid;  $[\alpha]_D^{28} = +64.7$  (*c* 3.25, CHCl<sub>3</sub>); UV (Me<sub>2</sub>CO)  $\lambda_{\max} = 210$  nm.

**LC-ESI-MS** (m/z): 489.3 ([M+Na]<sup>+</sup>), 467.3 ([M+H]<sup>+</sup>), 449.2 ([M-OH]<sup>+</sup>), 407.2 ([M-OAc]<sup>+</sup>).

**MALDI-TOF** (m/z): 489.2254 ([M+Na]<sup>+</sup>) (Calculated: 489.2252).

**IR** (CHCl<sub>3</sub>)  $\nu_{\max}$  (cm<sup>-1</sup>): 3448 (-OH), 1736 (Acetate carbonyl), 1706 (D ring ketone), 1665 (A ring ketone), 1598 (D ring tri-substituted double bond), 1383 (A ring geminal methyls), 1243 (Acetate C-O), 1216, 1160, 1029, 874 (Furan ring).

| Position           | $\delta_{\text{H}}$ (ppm),J(in Hz) | $\delta_{\text{C}}$ (ppm) | HMBC (H $\rightarrow$ C)     | NOESY (H $\rightarrow$ H)  |
|--------------------|------------------------------------|---------------------------|------------------------------|----------------------------|
| 1                  | 7.14 (d,10.04)                     | 157.21                    | 3,5,9,10,19                  | 19,2,9                     |
| 2                  | 5.86 (d,10.04)                     | 125.71                    | 4,10                         | 1                          |
| 3                  | -                                  | 204.19                    |                              |                            |
| 4                  | -                                  | 43.97                     |                              |                            |
| 5                  | 2.17 (m)                           | 45.89                     | 4,7,10,19,28,29              | 28,9                       |
| 6                  | 1.79-2.06 (m)                      | 23.39                     |                              |                            |
| 7                  | 5.29 (m)                           | 74.04                     | 5,9,8,30, -COCH <sub>3</sub> | 30,15                      |
| 8                  | -                                  | 44.75                     |                              |                            |
| 9                  | 2.3 (m)                            | 38.62                     | 1,8,10,11,14,19,30           | 18,5,1                     |
| 10                 | -                                  | 39.85                     |                              |                            |
| 11                 | 1.79-2.06 (m)                      | 15.77                     |                              |                            |
| 12                 | $\beta$ 2.56 (m), $\alpha$ 1.57(m) | 22.20                     | $\beta$ 11,13,17,18          | ( $\beta$ ) 30,12 $\alpha$ |
| 13                 | -                                  | 50.24                     |                              |                            |
| 14                 | -                                  | 193.66                    |                              |                            |
| 15                 | 5.74 (s)                           | 122.40                    | 8,13,14,16,17                | 30,7                       |
| 16                 | -                                  | 206.02                    |                              |                            |
| 17                 | -                                  | 80.56                     |                              |                            |
| 18                 | 0.94 (s)                           | 30.76                     | 12,13,14,17                  | 12 $\alpha$ ,9,22,21       |
| 19                 | 1.22 (s)                           | 19.03                     | 1,5,9,10                     | 29,1,30                    |
| 20                 | -                                  | 120.17                    |                              |                            |
| 21                 | 7.52 (m)                           | 141.31                    | 20,22,23                     | 18                         |
| 22                 | 6.37 (m)                           | 109.52                    | 17,20,21,23                  | 18,12 $\alpha$ ,23         |
| 23                 | 7.38 (m)                           | 142.62                    | 20,21                        | 22                         |
| 28                 | 1.05 (s)                           | 26.92                     | 29                           | 5                          |
| 29                 | 1.07 (s)                           | 21.15                     | 3,4,5,28                     | 19                         |
| 30                 | 1.34 (s)                           | 25.11                     | 7,8,9,14                     | 19,12 $\beta$ ,7,15        |
| -COCH <sub>3</sub> | 1.91 (s)                           | 20.9                      | -COCH <sub>3</sub>           |                            |
| -COCH <sub>3</sub> | -                                  | 169.67                    |                              |                            |

12 $\beta$ -Hydroxyzadiradione (3):

White solid;  $[\alpha]_{\text{D}}^{28} = -3.3$  (c 2.35, CHCl<sub>3</sub>); UV (Me<sub>2</sub>CO)  $\lambda_{\text{max}} = 210$  nm.

LC-ESI-MS (m/z): 489.3 ([M+Na]<sup>+</sup>), 467.2 ([M+H]<sup>+</sup>), 449.2([M-OH]<sup>+</sup>), 407.3 ([M-OAc]<sup>+</sup>).

MALDI-TOF (m/z): 489.2286 ([M+Na]<sup>+</sup>) (Calculated: 489.2252).

**IR** (CHCl<sub>3</sub>)  $\nu_{\max}$  (cm<sup>-1</sup>): 3448 (-OH), 1735 (Acetate carbonyl), 1719 (A ring double bond), 1691(D ring ketone), 1670 (A ring ketone), 1600 (D ring tri-substituted double bond), 1384 (A ring geminal methyls), 1243 (Acetate C-O), 1216, 1152, 1027, 874 (Furan ring).

| Position                    | $\delta_{\text{H}}$ (ppm),J(in Hz)  | $\delta_{\text{C}}$ (ppm) | HMBC (H→C)                          | NOESY (H→H)                |
|-----------------------------|-------------------------------------|---------------------------|-------------------------------------|----------------------------|
| 1                           | 7.11 (d,10.38)                      | 156.48                    | 19,9,10,5,3                         | 19,9,2                     |
| 2                           | 5.87 (d,10.07)                      | 126.05                    | 10,4                                | 1                          |
| 3                           | -                                   | 204.06                    |                                     |                            |
| 4                           | -                                   | 44.13                     |                                     |                            |
| 5                           | 2.18 (m)                            | 46.31                     | 19,29,28,10,4,7                     | 28,9                       |
| 6                           | 1.90 (m),2.03 (m)                   | 23.43                     |                                     |                            |
| 7                           | 5.31 (m)                            | 74.55                     | 5,8,9,30, <u>C</u> OCH <sub>3</sub> | 30,15                      |
| 8                           | -                                   | 44.43                     |                                     |                            |
| 9                           | 2.49 (m)                            | 37.92                     | 19,11,10,14,30,8                    | 18,5,1                     |
| 10                          | -                                   | 39.76                     |                                     |                            |
| 11                          | $\alpha$ 2.53 (m), $\beta$ 1.90 (m) | 28.31                     | ( $\alpha$ ) 9                      | ( $\alpha$ ) 12,11 $\beta$ |
| 12                          | 4.05 (br. d, 7.32)                  | 68.37                     | 18,9,11,13,14                       | 18,11 $\alpha$ ,17,22      |
| 13                          | -                                   | 52.73                     |                                     |                            |
| 14                          | -                                   | 189.97                    |                                     |                            |
| 15                          | 5.90 (m)                            | 125.02                    | 17,14,16,8,13                       | 30,7                       |
| 16                          | -                                   | 205.76                    |                                     |                            |
| 17                          | 4.31 (s)                            | 52.38                     | 18,13,12,22,20,21,16                | 12,22,21                   |
| 18                          | 0.99 (s)                            | 25.22                     | 13,12,14                            | 12,22,9,21                 |
| 19                          | 1.24 (s)                            | 19.26                     | 1,9,10,5                            | 1,29,30                    |
| 20                          | -                                   | 118.50                    |                                     |                            |
| 21                          | 7.46 (m)                            | 141.98                    | 20,22,23                            | 18,17                      |
| 22                          | 6.27 (m)                            | 111.28                    | 20,21,17                            | 18,12,17,23                |
| 23                          | 7.40 (m)                            | 142.87                    | 20,21                               | 22                         |
| 28                          | 1.07 (s)                            | 26.94                     | 29                                  | 5                          |
| 29                          | 1.08 (s)                            | 21.21                     | 28,4,5,3                            | 19                         |
| 30                          | 1.48 (s)                            | 25.49                     | 9,8,7,14                            | 7,15,19                    |
| - <u>C</u> OCH <sub>3</sub> | 1.94 (s)                            | 21.02                     | <u>C</u> OCH <sub>3</sub>           |                            |
| - <u>C</u> OCH <sub>3</sub> | -                                   | 169.58                    |                                     |                            |



1,2-Dihydroazadiradione (4) :

White solid;  $[\alpha]_{\text{D}}^{28} = -24.0$  (*c* 3.10, CHCl<sub>3</sub>); UV (Me<sub>2</sub>CO)  $\lambda_{\text{max}} = 209$  nm.

**LC-ESI-MS** (m/z): 475.2 ([M+Na]<sup>+</sup>), 453.2 ([M+H]<sup>+</sup>), 393.2 ([M-OAc]<sup>+</sup>).

**MALDI-TOF** (m/z): 475.2476 ([M+Na]<sup>+</sup>) (Calculated:475.2460).

**IR** (CHCl<sub>3</sub>)  $\nu_{\text{max}}$  (cm<sup>-1</sup>): 1735 (Acetate carbonyl), 1701 (D ring ketone and A ring ketone), 1598 (D ring tri-substituted double bond), 1381 (A ring geminal methyl), 1241 (Acetate C-O), 1165, 1149, 1029, 874 (Furan ring).

**<sup>1</sup>H NMR (200 MHz, CDCl<sub>3</sub>);  $\delta$ (ppm):** 7.45 (1H, m, H-21), 7.41 (1H, m, H-23), 6.25 (1H, m, H-22), 5.86 (1H, s, H-15), 5.29 (1H, m, H-7), 3.39 (1H, s, H-17), 2.58 (1H, m, H-2 $\beta$ ), 2.45 (1H, m, H-2 $\alpha$ ), 2.28 (1H, m, H-9), 1.94 (3H, s, COCH<sub>3</sub>), 1.30 (3H, s, H-30), 1.11 (3H, s, H-19), 1.05 (3H, s, H-29), 1.01 (6H, s, H-28,18).

**<sup>13</sup>C NMR (50 MHz, CDCl<sub>3</sub>);  $\delta$ (ppm):** 215.90 (C-3), 205.24 (C-16), 192.87 (C-14), 169.62 (C-COCH<sub>3</sub>), 142.66 (C-23), 141.54 (C-21), 123.23 (C-15), 118.46 (C-20), 111.10 (C-22), 74.32 (C-7), 60.57 (C-17), 48.07 (C-5), 48.03 (C-13), 46.79 (C-4), 43.85 (C-8), 42.42 (C-9), 38.35 (C-1), 37.09 (C-10), 33.72 (C-2), 30.22 (C-12), 26.17 (C-18), 25.87, 25.73 (C-28,30), 23.84 (C-6), 20.99, 20.97 (C-29, COCH<sub>3</sub>), 15.69 (C-11), 14.93 (C-19).

17 $\beta$ -Hydroxy-1,2-dihydroazadiradione (5) :

White solid;  $[\alpha]_{\text{D}}^{28} = +44.2$  (*c* 2.50, CHCl<sub>3</sub>); UV (Me<sub>2</sub>CO)  $\lambda_{\text{max}} = 208$  nm.

**LC-ESI-MS** (m/z): 491.2 ([M+Na]<sup>+</sup>), 469.2 ([M+H]<sup>+</sup>), 451.4 ([M-OH]<sup>+</sup>), 409.2 ([M-OAc]<sup>+</sup>).

**MALDI-TOF** (m/z): 491.2388 ([M+Na]<sup>+</sup>) (Calculated: 491.2409).

**IR** (CHCl<sub>3</sub>)  $\nu_{\text{max}}$  (cm<sup>-1</sup>): 3446 (-OH), 1733 (Acetate carbonyl), 1705 (D ring ketone and A ring ketone), 1598 (D ring tri-substituted double bond), 1381 (A ring geminal methyls), 1242 (Acetate C-O), 1158, 1030, 873 (Furan ring).

**<sup>1</sup>H NMR (500 MHz, CDCl<sub>3</sub>);  $\delta$ (ppm):** 7.58 (1H, m, H-21), 7.42 (1H, m, H-23), 6.40 (1H, m, H-22), 5.78 (1H, s, H-15), 5.31 (1H, m, H-7), 2.61 (1H, m, H-2 $\beta$ ), 2.44 (1H, m, H-2 $\alpha$ ), 2.15

(1H, m, H-9), 1.95 (3H, s, COCH<sub>3</sub>), 1.33 (3H, s, H-30), 1.12 (3H, s, H-19), 1.06 (3H, s, H-29), 1.03 (3H, s, H-28), 0.97 (3H, s, H-18).

**<sup>13</sup>C NMR (125 MHz, CDCl<sub>3</sub>); δ(ppm):** 216.08 (C-3), 205.98 (C-16), 194.18 (C-14), 169.73 (C-COCH<sub>3</sub>), 142.78 (C-23), 141.43 (C-21), 122.53 (C-20), 120.19 (C-15), 109.53 (C-22), 80.59 (C-17), 74.49 (C-7), 50.32 (C-13), 48.03 (C-5), 46.85 (C-4), 44.22 (C-8), 42.96 (C-9), 38.47 (C-1), 37.20 (C-10), 33.78 (C-2), 30.40 (C-18), 25.80 (C-28), 24.89 (C-30), 23.96 (C-6), 22.03 (C-12), 21.03, 21.02 (C-29, COCH<sub>3</sub>), 15.67 (C-11), 15.14 (C-19).

**12β-Hydroxy-1,2-dihydroazadiadione (6) :**

White solid; [α]<sub>D</sub><sup>28</sup> = -42.6 (c 3.50, CHCl<sub>3</sub>); UV (Me<sub>2</sub>CO) λ = 220, 201 nm.

**LC-ESI-MS (m/z):** 491.3 ([M+Na]<sup>+</sup>), 469.3 ([M+H]<sup>+</sup>), 409.3 ([M-OAc]<sup>+</sup>).

**MALDI-TOF (m/z):** 491.2388 ([M+Na]<sup>+</sup>) (Calculated: 491.2409).

**IR (CHCl<sub>3</sub>) ν<sub>max</sub> (cm<sup>-1</sup>):** 3462 (-OH), 1736 (Acetate carbonyl), 1700 (D ring ketone and A ring ketone), 1600 (D ring tri-substituted double bond), 1381 (A ring geminal methyls), 1242 (Acetate C-O), 1154, 1028, 874 (Furan ring).

**<sup>1</sup>H NMR (500 MHz, CDCl<sub>3</sub>); δ(ppm):** 7.46 (1H, m, H-21), 7.42 (1H, m, H-23), 6.27 (1H, m, H-22), 5.91 (1H, s, H-15), 5.30 (1H, m, H-7), 4.28 (1H, s, H-17), 4.03 (1H, br. d, J= 6.7 Hz, H-12), 2.61 (1H, m, H-2β), 2.44 (1H, m, H-2α), 2.29 (2H, m, H-9,11α), 1.95 (3H, s, COCH<sub>3</sub>), 1.46 (3H, s, H-30), 1.11 (3H, s, H-19), 1.06 (3H, s, H-29), 1.02 (3H, s, H-28), 1.01 (3H, s, H-18).

**<sup>13</sup>C NMR (125 MHz, CDCl<sub>3</sub>); δ(ppm):** 216.09 (C-3), 206.16 (C-16), 190.70 (C-14), 169.69 (C-COCH<sub>3</sub>), 142.73 (C-23), 141.86 (C-21), 125.02 (C-15), 118.60 (C-20), 111.26 (C-22), 75.06 (C-7), 68.21 (C-12), 52.86 (C-13), 52.25 (C-17), 48.27 (C-5), 46.87 (C-4), 43.78 (C-8), 42.21 (C-9), 38.48 (C-1), 36.91 (C-10), 33.70 (C-2), 28.29 (C-11), 25.80 (C-28), 24.98 (C-30), 24.87 (C-18), 23.88 (C-6), 21.02 (C-COCH<sub>3</sub>), 20.93 (C-29), 15.23 (C-19).

1,2 $\alpha$ -Epoxyazadiradione (7) :

White solid;  $[\alpha]_D^{28} = +46.8$  (*c* 2.20, CHCl<sub>3</sub>); UV (Me<sub>2</sub>CO)  $\lambda = 218, 207$  nm.

**LC-ESI-MS** (m/z): 489.3 ([M+Na]<sup>+</sup>), 467.1 ([M+H]<sup>+</sup>), 407.2 ([M-OAc]<sup>+</sup>).

**MALDI-TOF** (m/z): 489.2254 ([M+Na]<sup>+</sup>) (Calculated: 489.2252).

**IR** (CHCl<sub>3</sub>)  $\nu_{\max}$  (cm<sup>-1</sup>): 1735 (Acetate carbonyl), 1701 (D ring ketone and A ring ketone), 1599 (D ring tri-substituted double bond), 1381 (A ring geminal methyls), 1240 (Acetate C-O), 1165, 1036, 874 (Furan ring).

**<sup>1</sup>H NMR (200 MHz, CDCl<sub>3</sub>);  $\delta$ (ppm):** 7.45 (1H, m, H-21), 7.42 (1H, m, H-23), 6.26 (1H, m, H-22), 5.87 (1H, s, H-15), 5.27 (1H, m, H-7), 3.58 (1H, d, J=4.55 Hz, H-1), 3.41 (1H, s, H-17), 3.41 (1H, d, J=4.55 Hz, H-2), 2.75 (1H, m, H-9), 2.43 (1H, dd, J=11.87, 4.8 Hz, H-5), 1.98 (3H, s, COCH<sub>3</sub>), 1.29 (3H, s, H-30), 1.05, 1.04 (9H, s, H-18,19,28), 0.99 (3H, s, H-29).

**<sup>13</sup>C NMR (50 MHz, CDCl<sub>3</sub>);  $\delta$ (ppm):** 211.22 (C-3), 205.28 (C-16), 192.31 (C-14), 169.82 (C-COCH<sub>3</sub>), 142.72 (C-23), 141.54 (C-21), 123.14 (C-15), 118.31 (C-20), 111.06 (C-22), 73.64 (C-7), 62.72 (C-1), 60.55 (C-17), 56.41 (C-2), 47.99 (C-13), 44.07,44.02 (C-8,4), 38.77 (C-10), 38.66 (C-5), 36.80 (C-9), 30.03 (C-12), 27.36 (C-28), 26.17,25.99 (C-30,18), 23.10 (C-6), 20.95 (C-COCH<sub>3</sub>), 20.65 (C-29), 16.03 (C-11), 14.91 (C-19).

17 $\beta$ -Hydroxy-1,2 $\alpha$ -Epoxyazadiradione (8) :

White solid;  $[\alpha]_D^{28} = +132.4$  (*c* 1.50, CHCl<sub>3</sub>); UV (Me<sub>2</sub>CO)  $\lambda = 220, 204$  nm.

**LC-ESI-MS** (m/z): 505.2 ([M+Na]<sup>+</sup>), 483.2 ([M+H]<sup>+</sup>), 465.4 ([M-OH]<sup>+</sup>), 423.2 ([M-OAc]<sup>+</sup>).

**MALDI-TOF** (m/z): 505.2164 ([M+Na]<sup>+</sup>) (Calculated: 505.2202).

**IR** (CHCl<sub>3</sub>)  $\nu_{\max}$  (cm<sup>-1</sup>): 3448 (-OH), 1738 (Acetate carbonyl), 1701 (D ring ketone and A ring ketone), 1598 (D ring tri-substituted double bond), 1381 (A ring geminal methyls), 1242 (Acetate C-O), 1159, 1033, 874 (Furan ring).

**<sup>1</sup>H NMR (500 MHz, CDCl<sub>3</sub>);  $\delta$ (ppm):** 7.60 (1H, m, H-21), 7.43 (1H, m, H-23), 6.41 (1H, m, H-22), 5.78 (1H, s, H-15), 5.29 (1H, m, H-7), 3.61 (1H, d, J=4.58 Hz, H-1), 3.43 (1H, d, J=4.58 Hz, H-2), 2.62 (1H, m, H-9), 2.55 (1H, m, H-12 $\beta$ ), 2.46 (1H, m, H-5), 1.65 (1H, m, H-

12 $\alpha$ ), 1.99 (3H, s, COCH<sub>3</sub>), 1.34 (3H, s, H-30), 1.07 (3H, s, H-19), 1.06 (3H, s, H-18), 1.03 (3H, s, H-28), 1.01 (3H, s, H-29).

**<sup>13</sup>C NMR (125 MHz, CDCl<sub>3</sub>);  $\delta$ (ppm):** 211.24 (C-3), 205.80 (C-16), 193.31 (C-14), 169.84 (C-COCH<sub>3</sub>), 142.88 (C-23), 141.50 (C-21), 122.44 (C-20), 120.09 (C-15), 109.50 (C-22), 80.63 (C-17), 73.83 (C-7), 62.90 (C-1), 56.55 (C-2), 50.28 (C-13), 44.38, 44.17 (C-4,8), 38.88 (C-10), 38.63 (C-5), 37.29 (C-9), 30.39 (C-18), 27.45 (C-28), 25.06 (C-30), 23.24 (C-6), 21.88 (C-12), 21.03 (C-COCH<sub>3</sub>), 20.73 (C-29), 16.04 (C-11), 15.07 (C-19).

12 $\beta$ -Hydroxy-1,2 $\alpha$ -Epoxyazadiradione (9) :

White solid;  $[\alpha]_D^{28} = +21.7$  (c 2.50, CHCl<sub>3</sub>); UV (Me<sub>2</sub>CO)  $\lambda = 217, 206$  nm.

**LC-ESI-MS (m/z):** 505.4 ([M+Na]<sup>+</sup>), 483.2 ([M+H]<sup>+</sup>), 423.2 ([M-OAc]<sup>+</sup>).

**MALDI-TOF (m/z):** 505.2164 ([M+Na]<sup>+</sup>) (Calculated: 505.2202).

**IR (CHCl<sub>3</sub>)  $\nu_{\max}$  (cm<sup>-1</sup>):** 3482 (-OH), 1735 (Acetate carbonyl), 1701 (D ring ketone and A ring ketone), 1600 (D ring tri-substituted double bond), 1381 (A ring geminal methyls), 1243 (Acetate C-O), 1154, 1035, 874 (Furan ring).

**<sup>1</sup>H NMR (500 MHz, CDCl<sub>3</sub>);  $\delta$ (ppm):** 7.48 (1H, m, H-21), 7.44 (1H, m, H-23), 6.28 (1H, m, H-22), 5.93 (1H, s, H-15), 5.28 (1H, m, H-7), 4.30 (1H, s, H-17), 4.10 (1H, dd, J= 7.3, 2.4 Hz, H-12), 3.55 (1H, d, J=4.58 Hz, H-1), 3.42 (1H, d, J=4.58 Hz, H-2), 2.78 (1H, m, H-9), 2.59 (1H, m, H-11 $\alpha$ ), 2.45 (1H, m, H-5), 1.99 (3H, s, COCH<sub>3</sub>), 1.47 (3H, s, H-30), 1.09 (3H, s, H-19), 1.07 (3H, s, H-18), 1.05 (3H, s, H-28), 1.01 (3H, s, H-29).

**<sup>13</sup>C NMR (125 MHz, CDCl<sub>3</sub>);  $\delta$ (ppm):** 211.15 (C-3), 205.88 (C-16), 189.87 (C-14), 169.79 (C-COCH<sub>3</sub>), 142.86 (C-23), 141.89 (C-21), 124.99 (C-15), 118.50 (C-20), 111.23 (C-22), 74.41 (C-7), 68.14 (C-12), 62.66 (C-1), 56.46 (C-2), 52.82 (C-13), 52.32 (C-17), 44.19, 44.01 (C-4, 8), 38.86 (C-5), 38.64 (C-10), 36.75 (C-9), 28.61 (C-11), 27.38 (C-28), 25.24 (C-30), 24.92 (C-18), 23.19 (C-6), 21.03 (C-COCH<sub>3</sub>), 20.69 (C-29), 15.17 (C-19).

Epoxyazadiradione (10):

White solid;  $[\alpha]_{\text{D}}^{28} = +31.1$  (*c* 2.40, CHCl<sub>3</sub>); UV (Me<sub>2</sub>CO)  $\lambda_{\text{max}} = 209$  nm.

LC-ESI-MS (m/z): 489.2 ([M+Na]<sup>+</sup>), 467.3 ([M+H]<sup>+</sup>), 407.3 ([M-OAc]<sup>+</sup>).

MALDI-TOF (m/z): 489.2249 ([M+Na]<sup>+</sup>) (Calculated: 489.2252).

IR (CHCl<sub>3</sub>)  $\nu_{\text{max}}$  (cm<sup>-1</sup>): 1751 (Acetate carbonyl), 1734 (D ring ketone), 1670 (A ring ketone), 1375 (A ring geminal methyls), 1239 (Acetate C-O), 1129, 1029, 875 (Furan ring).

<sup>1</sup>H NMR (400 MHz, CDCl<sub>3</sub>);  $\delta$ (ppm): 7.56 (1H, m, H-21), 7.40 (1H, m, H-23), 7.17 (1H, d, J=10.04 Hz, H-1), 6.24 (1H, m, H-22), 5.88 (1H, d, J=10.04 Hz, H-2), 4.73 (1H, m, H-7), 3.90 (1H, s, H-17), 3.41 (1H, s, H-15), 2.63 (1H, m, H-9), 2.20-2.15 (2H, m, H-5,12), 2.03 (3H, s, -COCH<sub>3</sub>), 1.22 (3H, s, H-19), 1.21 (3H, s, H-30), 1.08 (3H, s, H-29), 1.07 (3H, s, H-28), 1.04 (3H, s, H-18).

<sup>13</sup>C NMR (100 MHz, CDCl<sub>3</sub>);  $\delta$ (ppm): 208.40 (C-16), 204.21 (C-3), 169.74 (C-COCH<sub>3</sub>), 157.47 (C-1), 142.43 (C-23), 141.53 (C-21), 125.76 (C-2), 116.51 (C-20), 110.87 (C-22), 73.63 (C-7), 72.54 (C-14), 57.18 (C-15), 50.94 (C-17), 46.67 (C-5), 44.22 (C-4), 43.12 (C-8), 42.53 (C-13), 39.69 (C-9), 39.65 (C-10), 29.09 (C-12), 27.02 (C-28), 24.82 (C-18), 24.20 (C-6), 21.26 (C-COCH<sub>3</sub>), 20.99 (C-29), 19.82 (C-19), 19.39 (C-30), 16.06 (C-11).

12 $\beta$ -Hydroxyepoxyazadiradione (11):

White solid;  $[\alpha]_{\text{D}}^{28} = +16.4$  (*c* 2.60, CHCl<sub>3</sub>); UV (Me<sub>2</sub>CO)  $\lambda_{\text{max}} = 209$  nm.

LC-ESI-MS (m/z): 505.4 ([M+Na]<sup>+</sup>), 483.3 ([M+H]<sup>+</sup>), 423.4 ([M-OAc]<sup>+</sup>).

MALDI-TOF (m/z): 505.2195 ([M+Na]<sup>+</sup>) (Calculated: 505.2202).

IR (CHCl<sub>3</sub>)  $\nu_{\text{max}}$  (cm<sup>-1</sup>): 3481 (-OH), 1749 (Acetate carbonyl and D ring ketone), 1669 (A ring ketone), 1376 (A ring geminal methyls), 1239 (Acetate C-O), 1133, 1026, 875 (Furan ring).

| Position                   | $\delta_{\text{H}}$ (ppm),J(in Hz)  | $\delta_{\text{C}}$ (ppm) | HMBC (H $\rightarrow$ C)        | NOESY (H $\rightarrow$ H)                    |
|----------------------------|-------------------------------------|---------------------------|---------------------------------|----------------------------------------------|
| 1                          | 7.13 (d,10.3)                       | 157.08                    | 3,5,10                          | 19,11 $\alpha$ ,2                            |
| 2                          | 5.88 (d,10.0)                       | 125.87                    | 4,10                            | 1                                            |
| 3                          | -                                   | 204.22                    |                                 |                                              |
| 4                          | -                                   | 44.18                     |                                 |                                              |
| 5                          | 2.14 (m)                            | 46.59                     | 4,9,28                          | 9                                            |
| 6                          | 1.96-1.85 (m)                       | 24.18                     |                                 |                                              |
| 7                          | 4.72 (m)                            | 73.49                     | 5,9, - <u>COCH</u> <sub>3</sub> | 15,6,30                                      |
| 8                          | -                                   | 43.00                     |                                 |                                              |
| 9                          | 2.52 (m)                            | 39.27                     | 1,8,10,12,30                    | 18,5                                         |
| 10                         | -                                   | 39.35                     |                                 |                                              |
| 11                         | $\alpha$ 2.59 (m), $\beta$ 1.82 (m) | 29.04                     |                                 | $\alpha$ 1,12                                |
| 12                         | 3.95 (dd,8.4,4.9)                   | 70.66                     | 13,14,18                        | 18,11 $\alpha$ ,17,22                        |
| 13                         | -                                   | 47.32                     |                                 |                                              |
| 14                         | -                                   | 71.24                     |                                 |                                              |
| 15                         | 3.31 (s)                            | 54.79                     | 16,17                           | 18,30,17,7, - <u>COCH</u> <sub>3</sub>       |
| 16                         | -                                   | 208.09                    |                                 |                                              |
| 17                         | 4.48 (s)                            | 44.89                     | 12,13,16,18,20,21,23            | 21,22,12,15,18                               |
| 18                         | 1.02 (s)                            | 23.26                     | 13,14,17                        | 21,22,17,12,15,9, - <u>COCH</u> <sub>3</sub> |
| 19                         | 1.21 (s)                            | 19.85                     | 1,5,10                          | 1                                            |
| 20                         | -                                   | 116.40                    |                                 |                                              |
| 21                         | 7.61 (m)                            | 141.98                    | 20,22,23                        | 17,18                                        |
| 22                         | 6.35 (m)                            | 111.18                    | 20,21                           | 23,17,12,18                                  |
| 23                         | 7.38 (m)                            | 142.37                    | 20,21                           | 22                                           |
| 28                         | 1.07 (s)                            | 26.96                     | 29                              |                                              |
| 29                         | 1.08 (s)                            | 20.88                     | 28,3,4,5                        |                                              |
| 30                         | 1.26 (s)                            | 19.28                     | 9,7,8,14                        | 7,15                                         |
| - <u>COCH</u> <sub>3</sub> | 2.02 (s)                            | 21.23                     | - <u>COCH</u> <sub>3</sub>      | 18,15                                        |
| - <u>COCH</u> <sub>3</sub> | -                                   | 169.69                    |                                 |                                              |

**1,2-Dihydroepoxyazadiradione (12):**

White solid;  $[\alpha]_{\text{D}}^{28} = +0.94$  (c 2.40, CHCl<sub>3</sub>); UV (Me<sub>2</sub>CO)  $\lambda_{\text{max}} = 218, 205$  nm.

**LC-ESI-MS** (m/z): 491.3 ([M+Na]<sup>+</sup>), 469.2 ([M+H]<sup>+</sup>), 409.4 ([M-OAc]<sup>+</sup>).

**MALDI-TOF** (m/z): 491.2310 ([M+Na]<sup>+</sup>) (Calculated: 491.2409).

**IR** (CHCl<sub>3</sub>)  $\nu_{\text{max}}$  (cm<sup>-1</sup>): 1751 (Acetate carbonyl), 1734 (D ring ketone), 1701 (A ring ketone), 1375 (A ring geminal methyls), 1240 (Acetate C-O), 1031, 875 (Furan ring).

**<sup>1</sup>H NMR (500 MHz, CDCl<sub>3</sub>); δ(ppm):** 7.56 (1H, m, H-21), 7.40 (1H, m, H-23), 6.24 (1H, m, H-22), 4.71 (1H, m, H-7), 3.88 (1H, s, H-17), 3.40 (1H, s, H-15), 2.60 (1H, m, H-2β), 2.45-2.50 (2H, m, H-2α and 9), 2.05 (3H, s, -COCH<sub>3</sub>), 1.18 (3H, s, H-30), 1.09 (3H, s, H-19), 1.05 (3H, s, H-29), 1.04 (3H, s, H-28), 1.02 (3H, s, H-18).

**<sup>13</sup>C NMR (125 MHz, CDCl<sub>3</sub>); δ(ppm):** 216.14 (C-3), 208.74 (C-16), 169.85 (C-COCH<sub>3</sub>), 142.39 (C-23), 141.55 (C-21), 116.64 (C-20), 110.96 (C-22), 74.08 (C-7), 72.68 (C-14), 57.40 (C-15), 50.80 (C-17), 48.30 (C-5), 46.83 (C-4), 43.99 (C-9), 42.69, 42.24 (C-8,13), 39.34 (C-1), 37.10 (C-10), 33.75 (C-2), 28.66 (C-12), 25.99 (C-28), 24.58 (C-6), 24.34 (C-18), 21.34 (C-COCH<sub>3</sub>), 20.69 (C-29), 19.07 (C-30), 16.19 (C-19), 15.98 (C-11).

12β-Hydroxy-1,2-Dihydroepoxyazadiradione (13):

White solid; [ $\alpha$ ]<sub>D</sub><sup>28</sup> = -14.1 (c 1.00, CHCl<sub>3</sub>); UV (Me<sub>2</sub>CO)  $\lambda_{\max}$  = 220, 204 nm.

**LC-ESI-MS (m/z):** 507.3 ([M+Na]<sup>+</sup>), 485.3 ([M+H]<sup>+</sup>), 425.4 ([M-OAc]<sup>+</sup>).

**MALDI-TOF (m/z):** 507.2367 ([M+Na]<sup>+</sup>) (Calculated: 507.2358).

**IR (CHCl<sub>3</sub>)  $\nu_{\max}$  (cm<sup>-1</sup>):** 3502 (-OH), 1748 (Acetate carbonyl), 1736 (D ring ketone), 1714 (A ring ketone), 1377 (A ring geminal methyls), 1240 (Acetate C-O), 1026, 875 (Furan ring).

**<sup>1</sup>H NMR (500 MHz, CDCl<sub>3</sub>); δ(ppm):** 7.63 (1H, m, H-21), 7.41 (1H, m, H-23), 6.35 (1H, m, H-22), 4.72 (1H, m, H-7), 4.49 (1H, s, H-17), 3.93 (1H, m, H-12), 3.32 (1H, s, H-15), 2.61 (1H, m, H-2β), 2.48 (1H, m, H-2α), 2.37-2.43 (2H, m, H-11α and 9), 2.05 (3H, s, -COCH<sub>3</sub>), 1.26 (3H, s, H-30), 1.10 (3H, s, H-19), 1.05 (3H, s, H-29), 1.04 (3H, s, H-28), 1.02 (3H, s, H-18).

**<sup>13</sup>C NMR (125 MHz, CDCl<sub>3</sub>); δ(ppm):** 215.83 (C-3), 208.10 (C-16), 169.74 (C-COCH<sub>3</sub>), 142.46 (C-23), 142.02 (C-21), 116.42 (C-20), 111.18 (C-22), 73.92 (C-7), 71.23 (C-14), 70.67 (C-12), 54.91 (C-15), 48.21 (C-5), 47.24 (C-13), 46.79 (C-4), 44.79 (C-17), 43.78 (C-9), 42.14 (C-8), 39.26 (C-1), 36.89 (C-10), 33.63 (C-2), 29.25 (C-11), 25.97 (C-28), 24.59 (C-6), 22.79 (C-18), 21.34 (C-COCH<sub>3</sub>), 20.62 (C-29), 18.97 (C-30), 16.32 (C-19).

Nimbocinol (14):

White solid;  $[\alpha]_{\text{D}}^{28} = +0.63$  (*c* 2.15, CHCl<sub>3</sub>); UV (Me<sub>2</sub>CO)  $\lambda_{\text{max}} = 215, 206$  nm.

LC-ESI-MS (*m/z*): 431.2 ([M+Na]<sup>+</sup>), 409.1 ([M+H]<sup>+</sup>), 391.4 ([M-OH]<sup>+</sup>).

MALDI-TOF (*m/z*): 431.2209 ([M+Na]<sup>+</sup>) (Calculated: 431.2198).

IR (CHCl<sub>3</sub>)  $\nu_{\text{max}}$  (cm<sup>-1</sup>): 3481 (-OH), 1697 (D ring ketone), 1668 (A ring ketone), 1597 (D ring tri-substituted double bond), 1382 (A ring geminal methyls), 1149, 1027, 874 (Furan ring).

<sup>1</sup>H NMR (200 MHz, CDCl<sub>3</sub>);  $\delta$ (ppm): 7.45 (1H, m, H-21), 7.41 (1H, m, H-23), 7.12 (1H, d, J=10.23 Hz, H-1), 6.25 (1H, m, H-22), 6.00 (1H, s, H-15), 5.85 (1H, d, J=10.23 Hz, H-2), 4.18 (1H, m, H-7), 3.43 (1H, s, H-17), 2.56 (1H, m, H-9), 2.45 (1H, m, H-5), 1.27 (3H, s, H-30), 1.21 (3H, s, H-19), 1.15 (3H, s, H-29), 1.10 (3H, s, H-28), 1.02 (3H, s, H-18).

<sup>13</sup>C NMR (50 MHz, CDCl<sub>3</sub>);  $\delta$ (ppm): 205.56 (C-16), 204.74 (C-3), 194.32 (C-14), 157.35 (C-1), 142.71 (C-23), 141.51 (C-21), 125.67 (C-2), 123.34 (C-15), 118.35 (C-20), 111.10 (C-22), 71.51 (C-7), 60.68 (C-17), 48.20 (C-13), 46.47 (C-8), 44.42 (C-5), 44.12 (C-4), 40.10 (C-10), 36.37 (C-9), 30.29 (C-12), 26.99 (C-28), 26.59 (C-30), 25.91 (C-18), 25.39 (C-6), 21.39 (C-29), 19.03 (C-19), 15.61 (C-11).

17 $\beta$ -Hydroxynimbocinol (15):

White solid;  $[\alpha]_{\text{D}}^{28} = +54.1$  (*c* 3.50, CHCl<sub>3</sub>); UV (Me<sub>2</sub>CO)  $\lambda_{\text{max}} = 220, 201$  nm.

LC-ESI-MS (*m/z*): 447.4 ([M+Na]<sup>+</sup>), 425.3 ([M+H]<sup>+</sup>), 407.3 ([M-OH]<sup>+</sup>).

MALDI-TOF (*m/z*): 447.2223 ([M+Na]<sup>+</sup>) (Calculated: 447.2147).

IR (CHCl<sub>3</sub>)  $\nu_{\text{max}}$  (cm<sup>-1</sup>): 3436 (-OH), 1698 (D ring ketone), 1664 (A ring ketone), 1595 (D ring tri-substituted double bond), 1383 (A ring geminal methyls), 1159, 1035, 873 (Furan ring).

<sup>1</sup>H NMR (400 MHz, CDCl<sub>3</sub>);  $\delta$ (ppm): 7.59 (1H, m, H-21), 7.43 (1H, m, H-23), 7.15 (1H, d, J=10.23 Hz, H-1), 6.41 (1H, m, H-22), 5.91 (1H, s, H-15), 5.87 (1H, d, J=10.23 Hz, H-2),



4.19 (1H, m, H-7), 1.31 (3H, s, H-30), 1.23 (3H, s, H-19), 1.17 (3H, s, H-29), 1.12 (3H, s, H-28), 0.98 (3H, s, H-18).

**<sup>13</sup>C NMR (100 MHz, CDCl<sub>3</sub>); δ(ppm):** 206.10 (C-16), 204.73 (C-3), 195.36 (C-14), 157.53 (C-1), 142.86 (C-23), 141.42 (C-21), 125.78 (C-2), 122.40 (C-20), 120.19 (C-15), 109.52 (C-22), 80.76 (C-17), 71.76 (C-7), 50.42 (C-13), 46.82 (C-8), 44.44 (C-5), 44.19 (C-4), 40.18 (C-10), 36.89 (C-9), 30.15 (C-18), 27.11 (C-28), 25.57 (C-30), 25.44 (C-6), 22.14 (C-12), 21.42 (C-29), 19.19 (C-19), 15.63 (C-11).

17β-Hydroxy-7-oxonimbocinol (16):

White solid; [α]<sub>D</sub><sup>28</sup> = + 7.61 (c 3.25, CHCl<sub>3</sub>); UV (Me<sub>2</sub>CO) λ<sub>max</sub> = 219, 204 nm.

**LC-ESI-MS (m/z):** 445.3 ([M+Na]<sup>+</sup>), 423.3 ([M+H]<sup>+</sup>), 405.3 ([M-OH]<sup>+</sup>).

**MALDI-TOF (m/z):** 445.1926 ([M+Na]<sup>+</sup>) (Calculated: 445.1990).

**IR (CHCl<sub>3</sub>) ν<sub>max</sub> (cm<sup>-1</sup>):** 3421 (-OH), 1708 (D ring ketone), 1673 (A ring ketone), 1595 (D ring tri-substituted double bond), 1379 (A ring geminal methyls), 1160, 1030, 874 (Furan ring).

**<sup>1</sup>H NMR (400 MHz, CDCl<sub>3</sub>); δ(ppm):** 7.58 (1H, m, H-21), 7.42 (1H, m, H-23), 7.15 (1H, d, J=10.04 Hz, H-1), 6.38 (2H, m, H-22,15), 5.94 (1H, d, J=10.29 Hz, H-2), 2.98 (1H, t, J=14.56 Hz, H-6β), 2.68 (2H, m, H-9,6α), 2.48 (1H, dd, J=14.05,2.51 Hz, H-5), 1.59 (3H, s, H-30), 1.42 (3H, s, H-19), 1.18 (3H, s, H-29), 1.15 (3H, s, H-28), 0.94 (3H, s, H-18).

**<sup>13</sup>C NMR (100 MHz, CDCl<sub>3</sub>); δ(ppm):** 206.80 (C-7), 206.07 (C-16), 203.07 (C-3), 185.34 (C-14), 155.57 (C-1), 142.84 (C-23), 141.53 (C-21), 126.76 (C-2), 126.32 (C-15), 122.40 (C-20), 109.40 (C-22), 80.27 (C-17), 54.23 (C-8), 52.79 (C-5), 50.62 (C-13), 45.33 (C-9), 44.80 (C-4), 39.72 (C-10), 36.01 (C-6), 32.03 (C-18), 26.73 (C-28), 25.86 (C-30), 23.47 (C-12), 20.94 (C-29), 18.80 (C-19), 16.99 (C-11).

7-Deacetylepoxызadiradione (17):

White solid;  $[\alpha]_{\text{D}}^{28} = +39.6$  (*c* 1.90, CHCl<sub>3</sub>); UV (Me<sub>2</sub>CO)  $\lambda_{\text{max}} = 210$  nm.

**LC-ESI-MS** (*m/z*): 447.1 ([M+Na]<sup>+</sup>), 425.2 ([M+H]<sup>+</sup>), 407.1 ([M-OH]<sup>+</sup>).

**MALDI-TOF** (*m/z*): 447.2151 ([M+Na]<sup>+</sup>) (Calculated: 447.2148).

**IR** (CHCl<sub>3</sub>)  $\nu_{\text{max}}$  (cm<sup>-1</sup>): 3501 (-OH), 1749 (D ring ketone), 1652 (A ring ketone), 1390 (A ring geminal methyls), 1216, 1030, 875 (Furan ring).

**<sup>1</sup>H NMR (400 MHz, CDCl<sub>3</sub>);  $\delta$ (ppm):** 7.53 (1H, m, H-21), 7.39 (1H, m, H-23), 7.18 (1H, d, *J*=10.38 Hz, H-1), 6.24 (1H, m, H-22), 5.86 (1H, d, *J*=10.38 Hz, H-2), 3.90 (1H, s, H-17), 3.64 (1H, m, H-7), 3.55 (1H, s, H-15), 2.66 (1H, m, H-9), 2.43 (1H, m, H-5), 1.19 (3H, s, H-19), 1.14 (3H, s, H-30), 1.12 (3H, s, H-29), 1.10 (3H, s, H-28), 1.05 (3H, s, H-18).

**<sup>13</sup>C NMR (100 MHz, CDCl<sub>3</sub>);  $\delta$ (ppm):** 209.32 (C-16), 204.86 (C-3), 158.25 (C-1), 142.33 (C-23), 141.50 (C-21), 125.55 (C-2), 116.85 (C-20), 111.05 (C-22), 73.24 (C-14), 71.17 (C-7), 57.64 (C-15), 51.23 (C-17), 45.28 (C-5), 44.44, 44.38 (C-4,8), 42.59 (C-13), 39.83 (C-10), 38.29 (C-9), 29.69 (C-12), 27.79 (C-6), 27.15 (C-28), 25.07 (C-18), 21.24 (C-29), 19.94 (C-19), 19.61 (C-30), 16.16 (C-11).

12 $\beta$ -Hydroxy-7-deacetylepoxызadiradione (18):

White solid;  $[\alpha]_{\text{D}}^{28} = +27.6$  (*c* 1.50, CHCl<sub>3</sub>); UV (Me<sub>2</sub>CO)  $\lambda_{\text{max}} = 208$  nm.

**LC-ESI-MS** (*m/z*): 463.0 ([M+Na]<sup>+</sup>), 441.1 ([M+H]<sup>+</sup>), 423.1 ([M-OH]<sup>+</sup>).

**MALDI-TOF** (*m/z*): 463.2124 ([M+Na]<sup>+</sup>) (Calculated: 463.2097).

**IR** (CHCl<sub>3</sub>)  $\nu_{\text{max}}$  (cm<sup>-1</sup>): 3525 (-OH), 1748 (D ring ketone), 1651 (A ring ketone), 1387 (A ring geminal methyls), 1215, 1024, 875 (Furan ring).

**<sup>1</sup>H NMR (400 MHz, CDCl<sub>3</sub>);  $\delta$ (ppm):** 7.60 (1H, m, H-21), 7.40 (1H, m, H-23), 7.14 (1H, d, *J*=10.04 Hz, H-1), 6.36 (1H, m, H-22), 5.87 (1H, d, *J*=10.29 Hz, H-2), 4.50 (1H, s, H-17), 3.93 (1H, m, H-12), 3.67 (1H, m, H-7), 3.47 (1H, s, H-15), 2.57-2.60 (2H, m, H-9,11 $\alpha$ ), 2.41

(1H, m, H-5), 1.20 (3H, s, H-19), 1.18 (3H, s, H-30), 1.14 (3H, s, H-29), 1.10 (3H, s, H-28), 1.06 (3H, s, H-18).

**<sup>13</sup>C NMR (100 MHz, CDCl<sub>3</sub>); δ(ppm):** 208.82 (C-16), 204.66 (C-3), 157.59 (C-1), 142.38,142.05 (C-23,21), 125.82 (C-2), 116.75 (C-20), 111.38 (C-22), 72.00 (C-14), 71.57 (C-7), 71.14 (C-12), 55.19 (C-15), 47.53 (C-13), 45.29,45.08 (C-17,5), 44.38,44.33 (C-4,8), 39.54 (C-10), 37.84 (C-9), 29.39 (C-11), 27.99 (C-6), 27.13 (C-28), 23.60 (C-18), 21.19 (C-29), 20.02 (C-19), 19.51 (C-20).

**Gedunin (19):**

White solid; [ $\alpha$ ]<sub>D</sub><sup>28</sup> = + 22.8 (c 1.50, CHCl<sub>3</sub>); UV (Me<sub>2</sub>CO)  $\lambda_{\max}$  = 214 nm.

**LC-ESI-MS (m/z):** 505.4 ([M+Na]<sup>+</sup>), 483.2 ([M+H]<sup>+</sup>), 423.5 ([M-OAc]<sup>+</sup>).

**MALDI-TOF (m/z):** 505.2216 ([M+Na]<sup>+</sup>) (Calculated: 505.2203).

**IR (CHCl<sub>3</sub>)  $\nu_{\max}$  (cm<sup>-1</sup>):** 1739 (Acetate carbonyl and D ring ketone), 1670 (A ring ketone), 1387 (A ring geminal methyls), 1216 (Acetate C-O), 1030, 875 (Furan ring).

**<sup>1</sup>H NMR (400 MHz, CDCl<sub>3</sub>); δ(ppm):** 7.42 (2H, m, H-21,23), 7.10 (1H, d, J=10.07 Hz, H-1), 6.34 (1H, m, H-22), 5.87 (1H, d, J=10.38 Hz, H-2), 5.62 (1H, s, H-17), 4.56 (1H, m, H-7), 3.53 (1H, s, H-15), 2.50 (1H, m, H-9), 2.17 (1H, m, H-5), 2.11 (3H, s, -COCH<sub>3</sub>), 1.25 (3H, s, H-18), 1.23 (3H, s, H-19), 1.16 (3H, s, H-30), 1.08 (3H, s, H-29), 1.07 (3H, s, H-28).

**<sup>13</sup>C NMR (100 MHz, CDCl<sub>3</sub>); δ(ppm):** 203.93 (C-3), 169.87 (C-COCH<sub>3</sub>), 167.42 (C-16), 156.90 (C-1), 143.08 (C-23), 141.20 (C-21), 126.01 (C-2), 120.44 (C-20), 109.86 (C-22), 78.26 (C-17), 73.24 (C-7), 69.76 (C-14), 56.89 (C-15), 46.05 (C-5), 44.05 (C-4), 42.64 (C-8), 40.04 (C-10), 39.54 (C-9), 38.74 (C-13), 27.16 (C-28), 26.02 (C-12), 23.26 (C-6), 21.18 (C-29), 21.05 (C-COCH<sub>3</sub>), 19.72 (C-19), 18.30 (C-30), 17.74 (C-18), 14.99 (C-11).

**12 $\beta$ -Hydroxygedunin (20):**

White solid; [ $\alpha$ ]<sub>D</sub><sup>28</sup> = + 11.6 (c 1.00, CHCl<sub>3</sub>); UV (Me<sub>2</sub>CO)  $\lambda_{\max}$  = 214 nm.

**LC-ESI-MS (m/z):** 521.2 ([M+Na]<sup>+</sup>), 499.2 ([M+H]<sup>+</sup>), 439.1 ([M-OAc]<sup>+</sup>).

**MALDI-TOF** (m/z): 521.2167 ([M+Na]<sup>+</sup>) (Calculated: 521.2152).

**IR** (CHCl<sub>3</sub>)  $\nu_{\max}$  (cm<sup>-1</sup>): 3393 (-OH), 1734 (Acetate carbonyl and D ring ketone), 1657 (A ring ketone), 1370 (A ring geminal methyls), 1216 (Acetate C-O), 1026, 874 (Furan ring).

**<sup>1</sup>H NMR (400 MHz, CDCl<sub>3</sub>);  $\delta$ (ppm):** 7.51 (1H, m, H-21), 7.43 (1H, m, H-23), 7.04 (1H, d, J=10.29 Hz, H-1), 6.47 (1H, m, H-22), 6.18 (1H, s, H-17), 5.87 (1H, d, J=10.04 Hz, H-2), 4.57 (1H, m, H-7), 3.94 (1H, br. d, J= 7.6 Hz, H-12), 3.45 (1H, s, H-15), 2.46-2.56 (2H, m, H-9,11 $\alpha$ ), 2.17 (1H, m, H-5), 2.12 (3H, s, -COCH<sub>3</sub>), 1.34 (3H, s, H-18), 1.25 (3H, s, H-19), 1.17 (3H, s, H-30), 1.08 (3H, s, H-29), 1.07 (3H, s, H-28).

**<sup>13</sup>C NMR (100 MHz, CDCl<sub>3</sub>);  $\delta$ (ppm):** 203.90 (C-3), 169.89 (C-COCH<sub>3</sub>), 167.41 (C-16), 156.42 (C-1), 143.21 (C-23), 141.45 (C-21), 126.19 (C-2), 120.02 (C-20), 109.86 (C-22), 75.57 (C-17), 73.38 (C-7), 69.22 (C-12), 68.28 (C-14), 55.02 (C-15), 46.09 (C-5), 44.06 (C-4), 42.82,42.32 (C-8,13), 39.90 (C-10), 39.22 (C-9), 28.39 (C-11), 27.13 (C-28), 23.14 (C-6), 21.17 (C-29), 21.06 (C-COCH<sub>3</sub>), 19.87 (C-19), 18.16 (C-30), 15.75 (C-18).

## Section C. Copies of NMR and LC-MS spectra

### Azadiradione (1)

Azadiradione.ESP

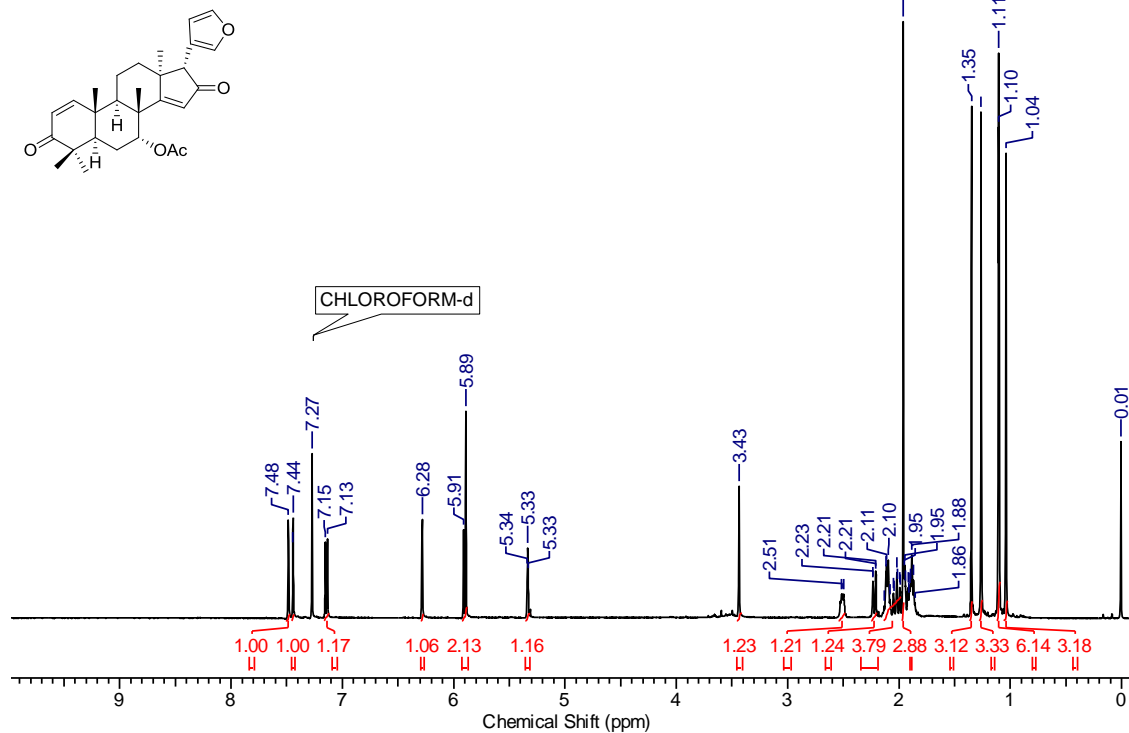

Azadiradione\_13C.ESP

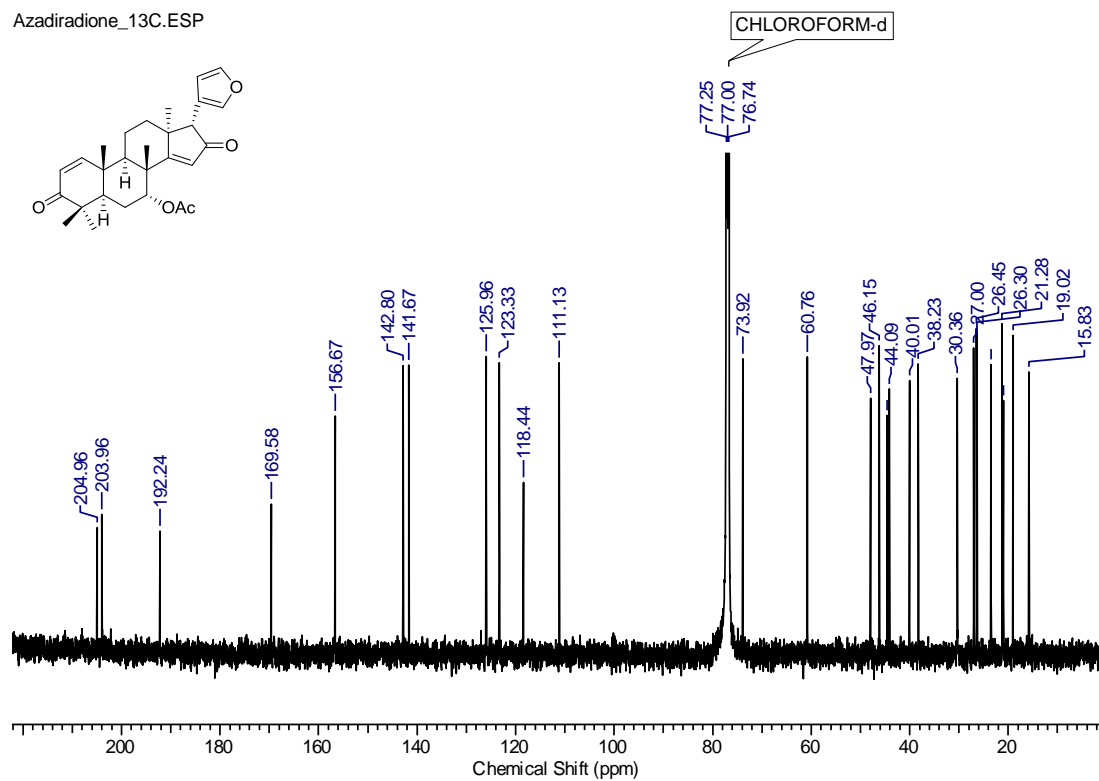

zadiradione\_DEPT.ESP

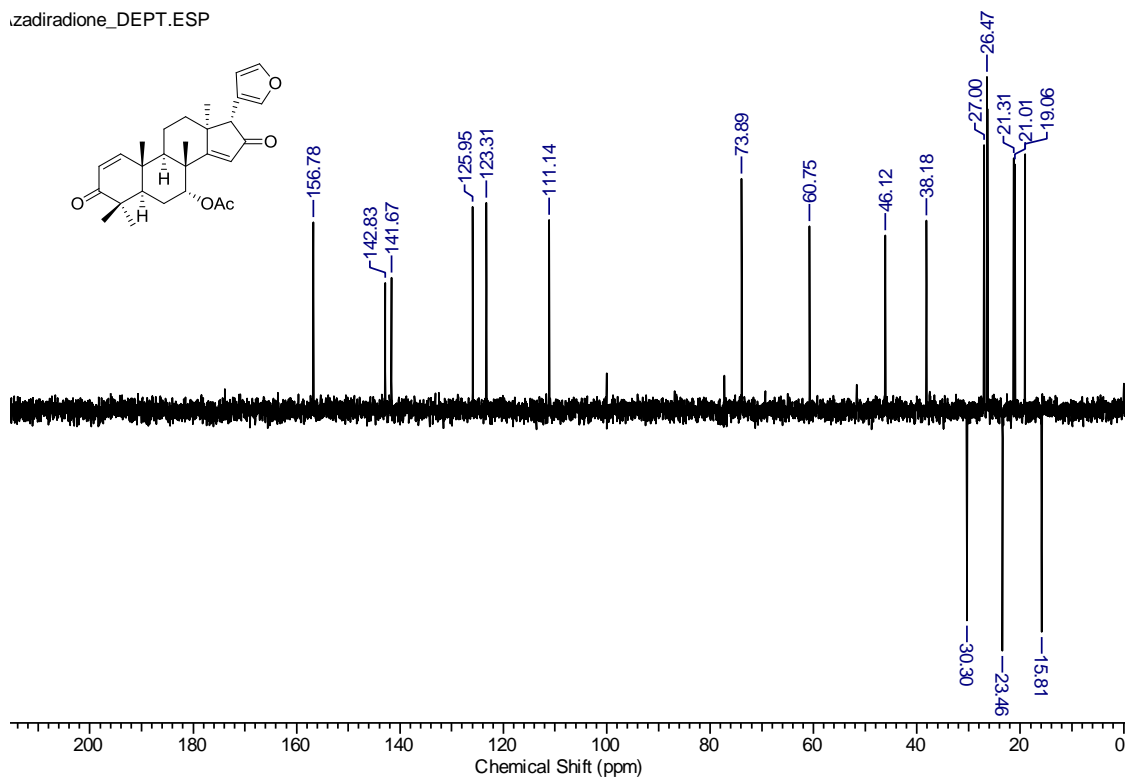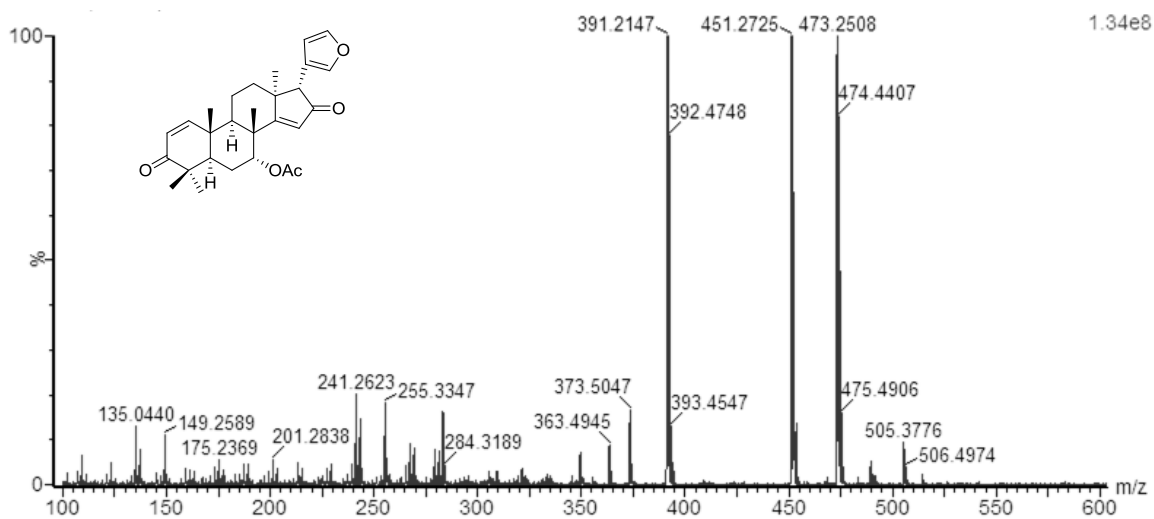

## 17 $\beta$ -Hydroxyzadiradione (2)

17 $\beta$ -hydroxyzadiradione.ESP

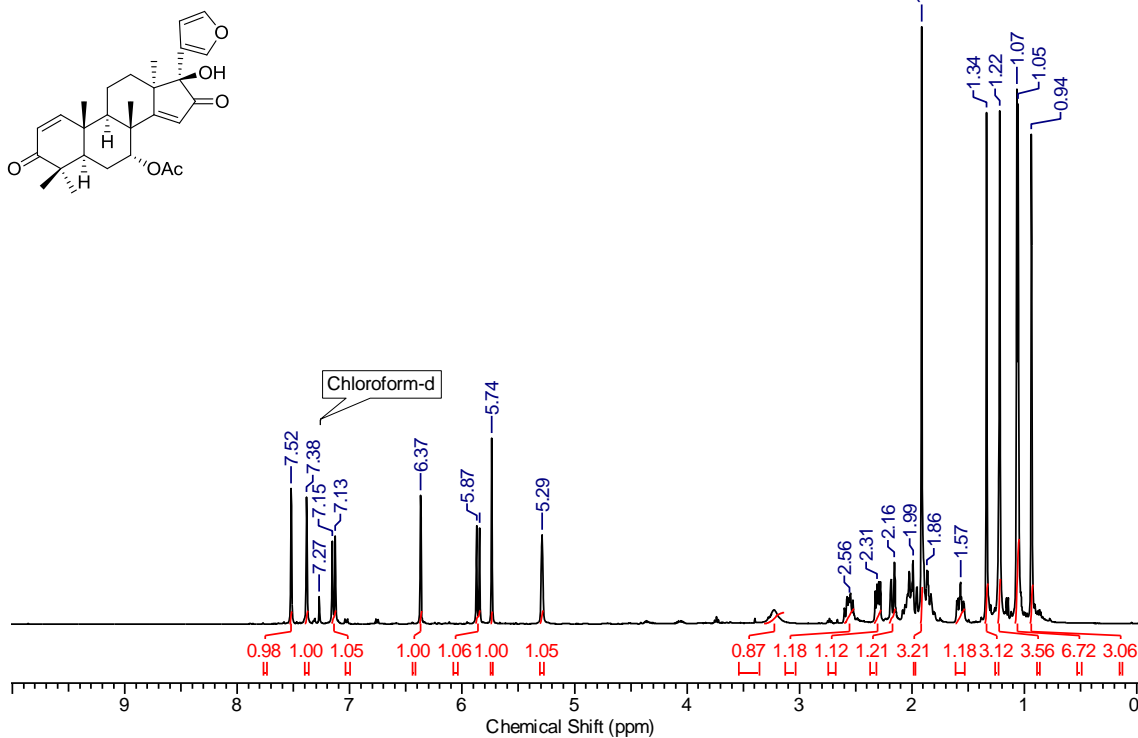

17 $\beta$ -hydroxyzadiradione\_13C.ESP

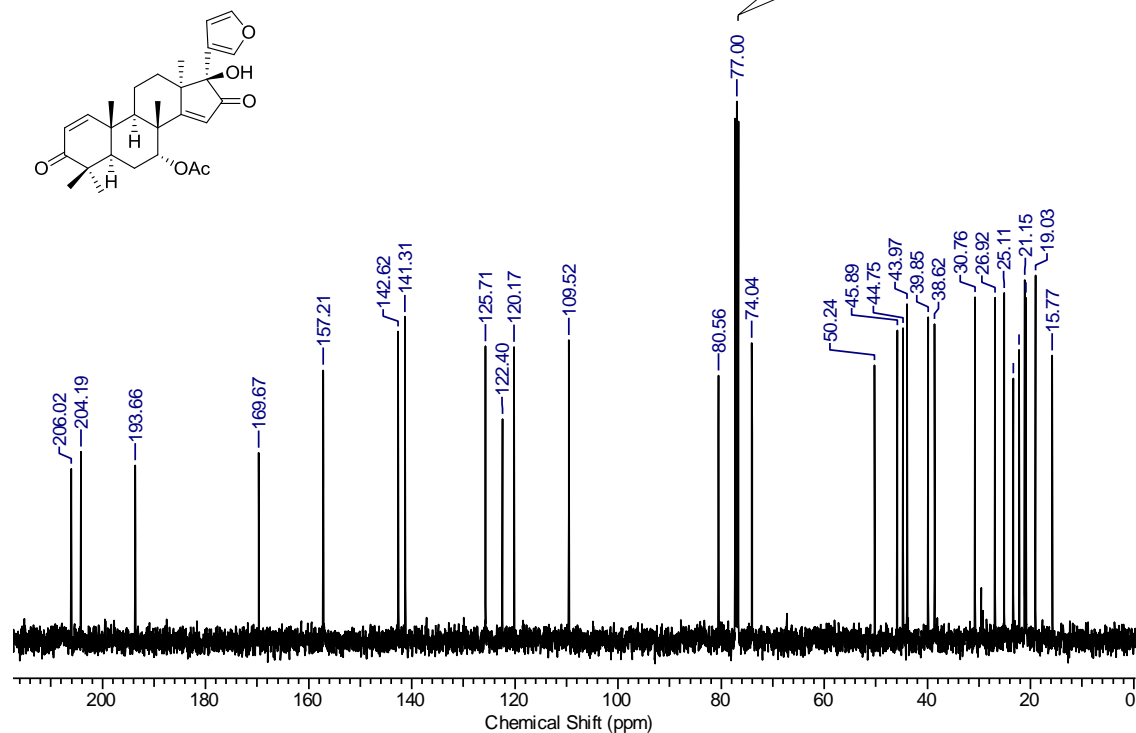

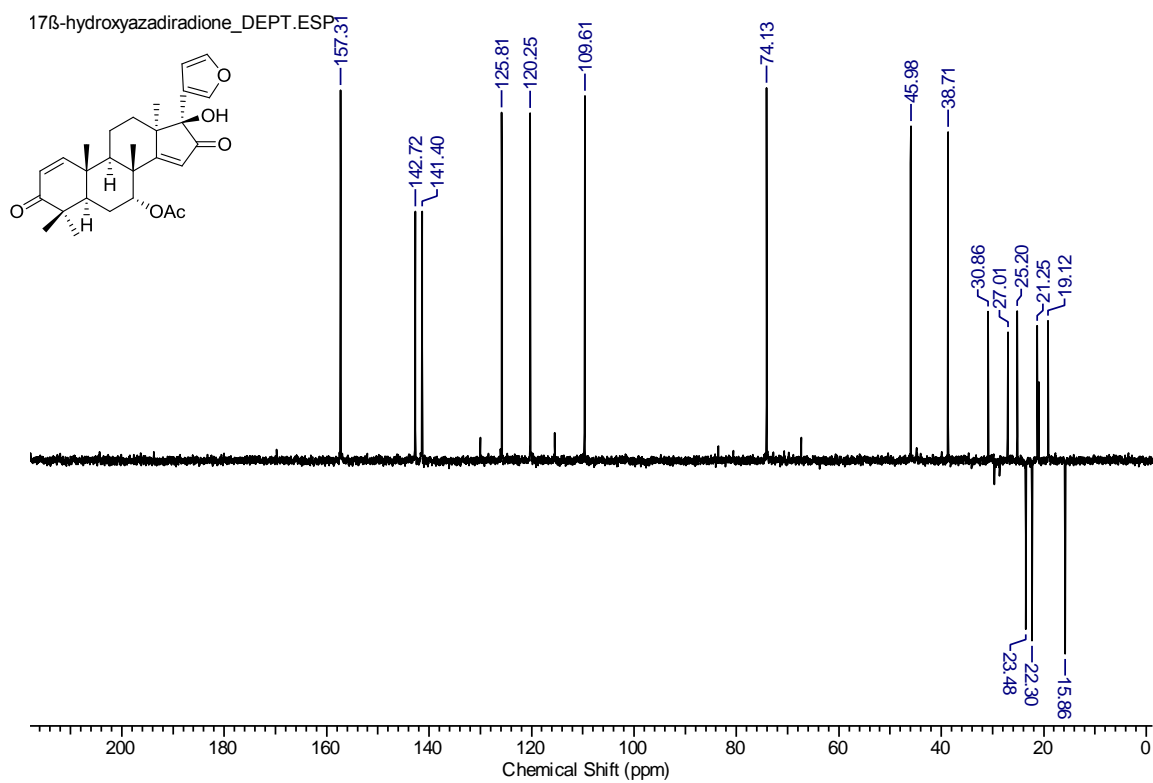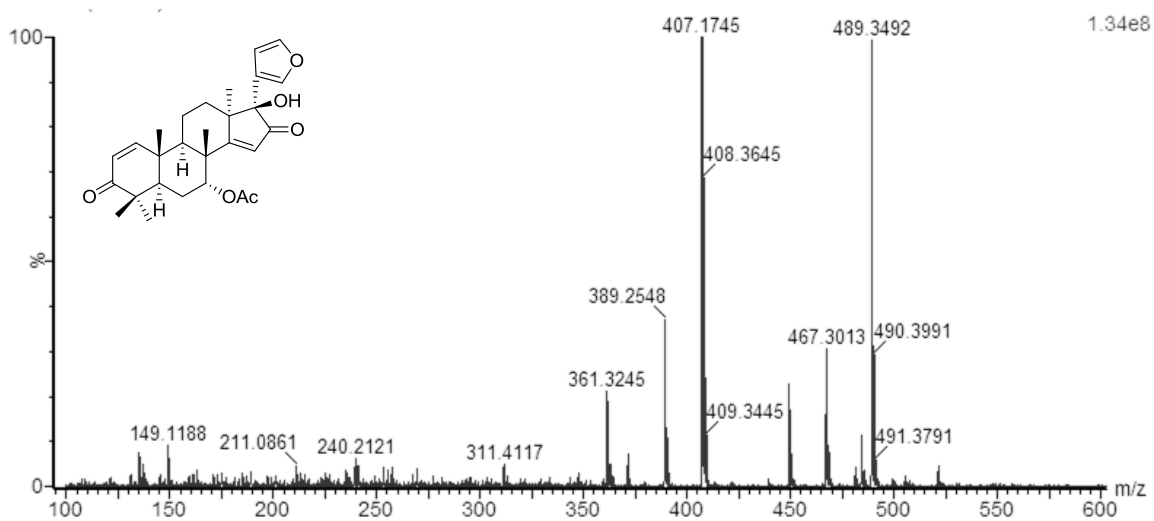



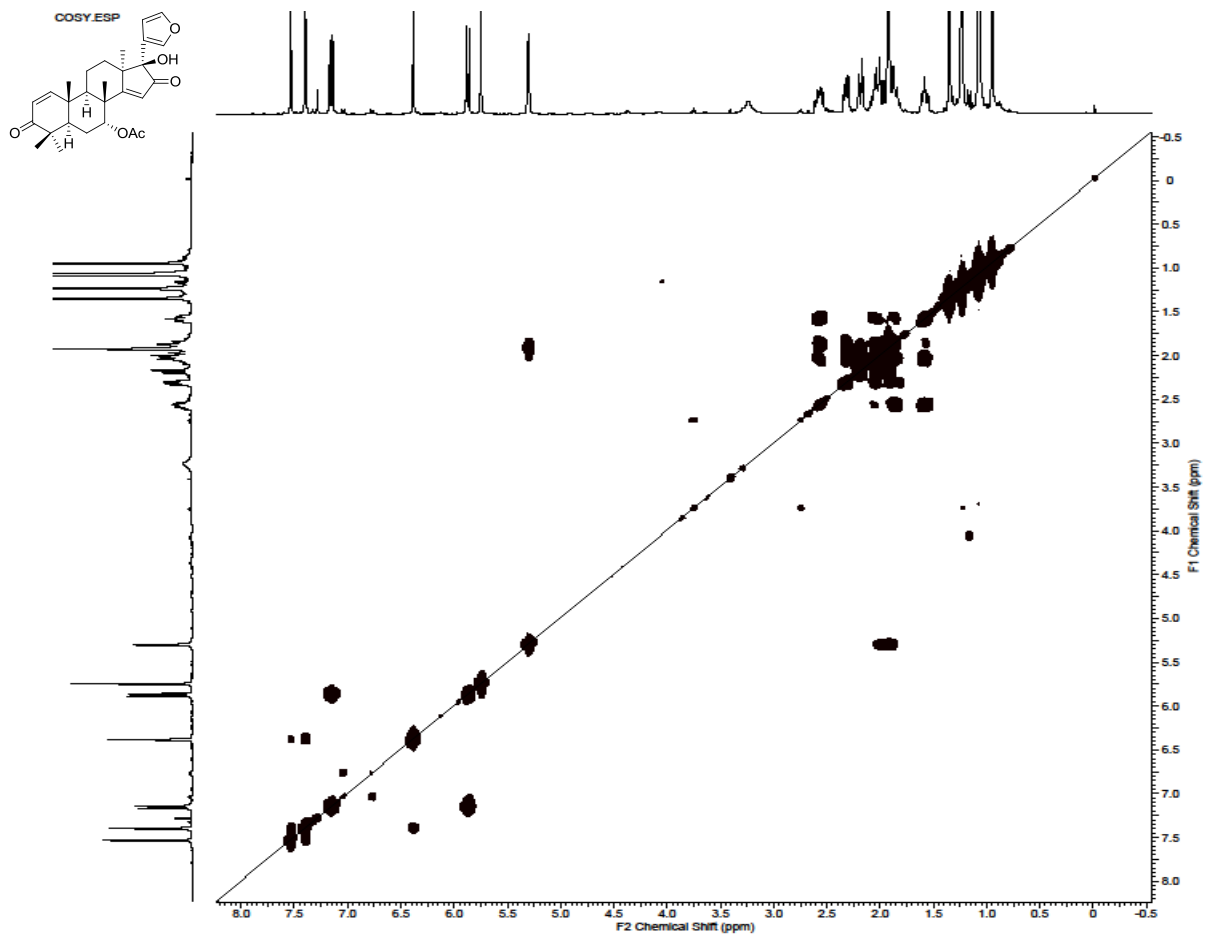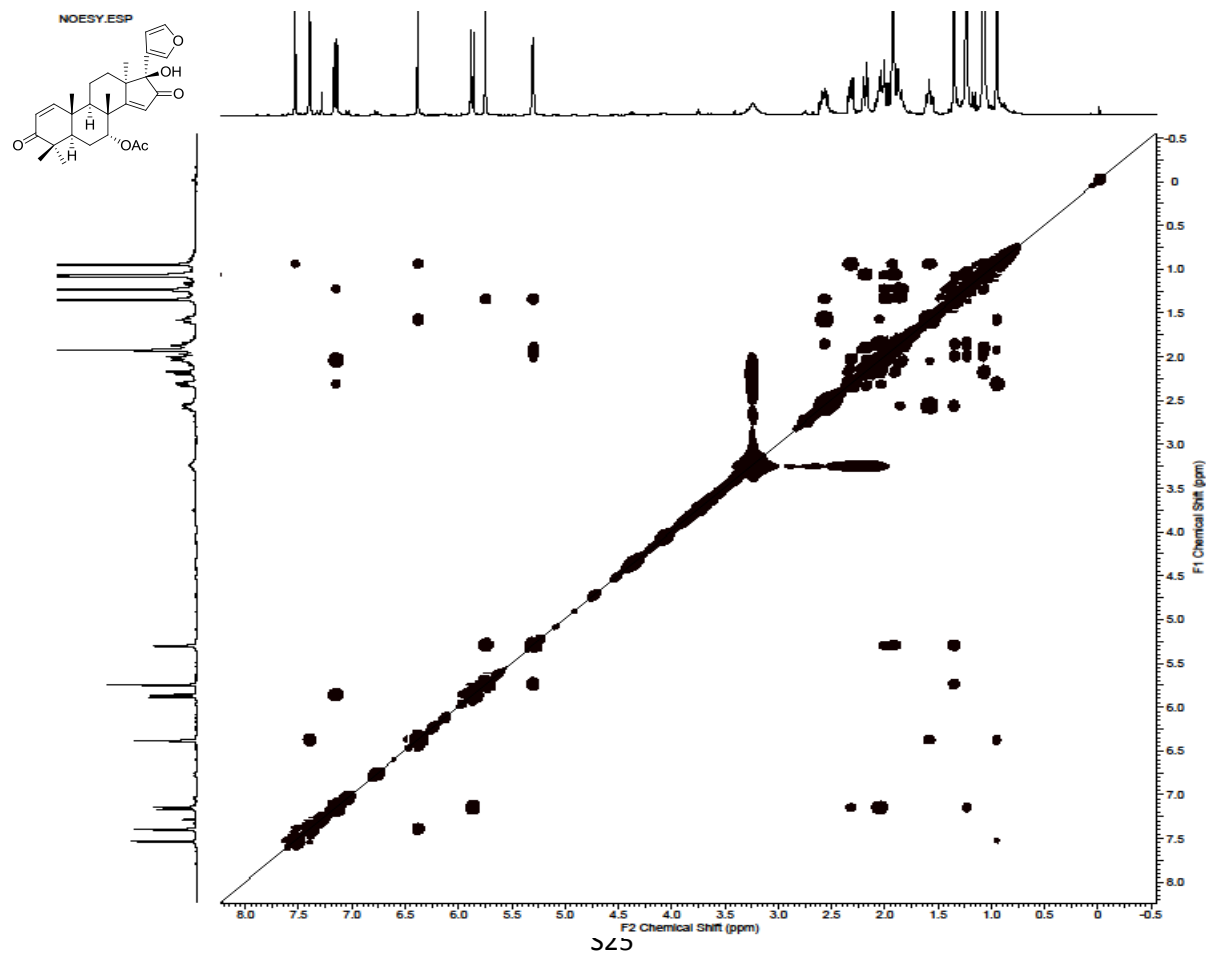

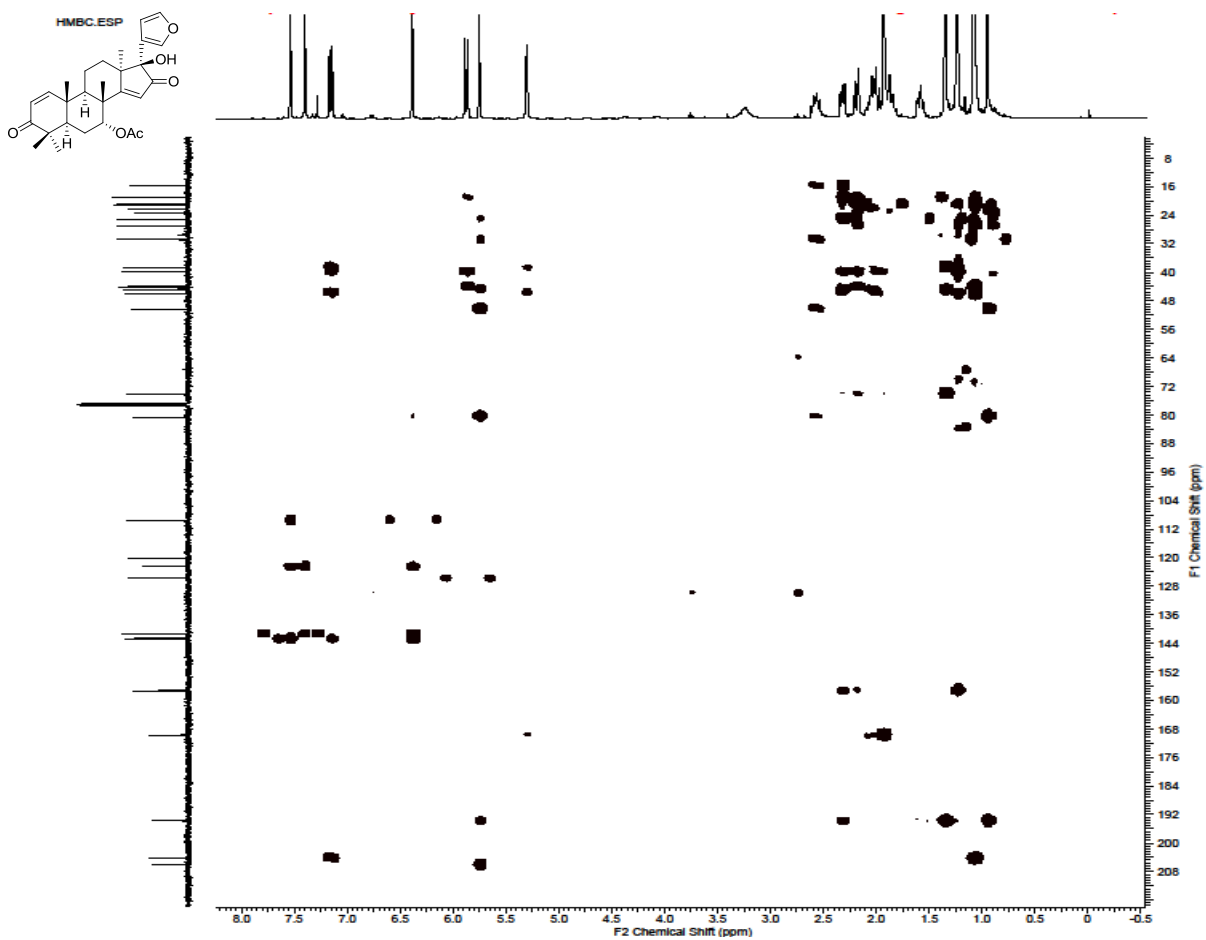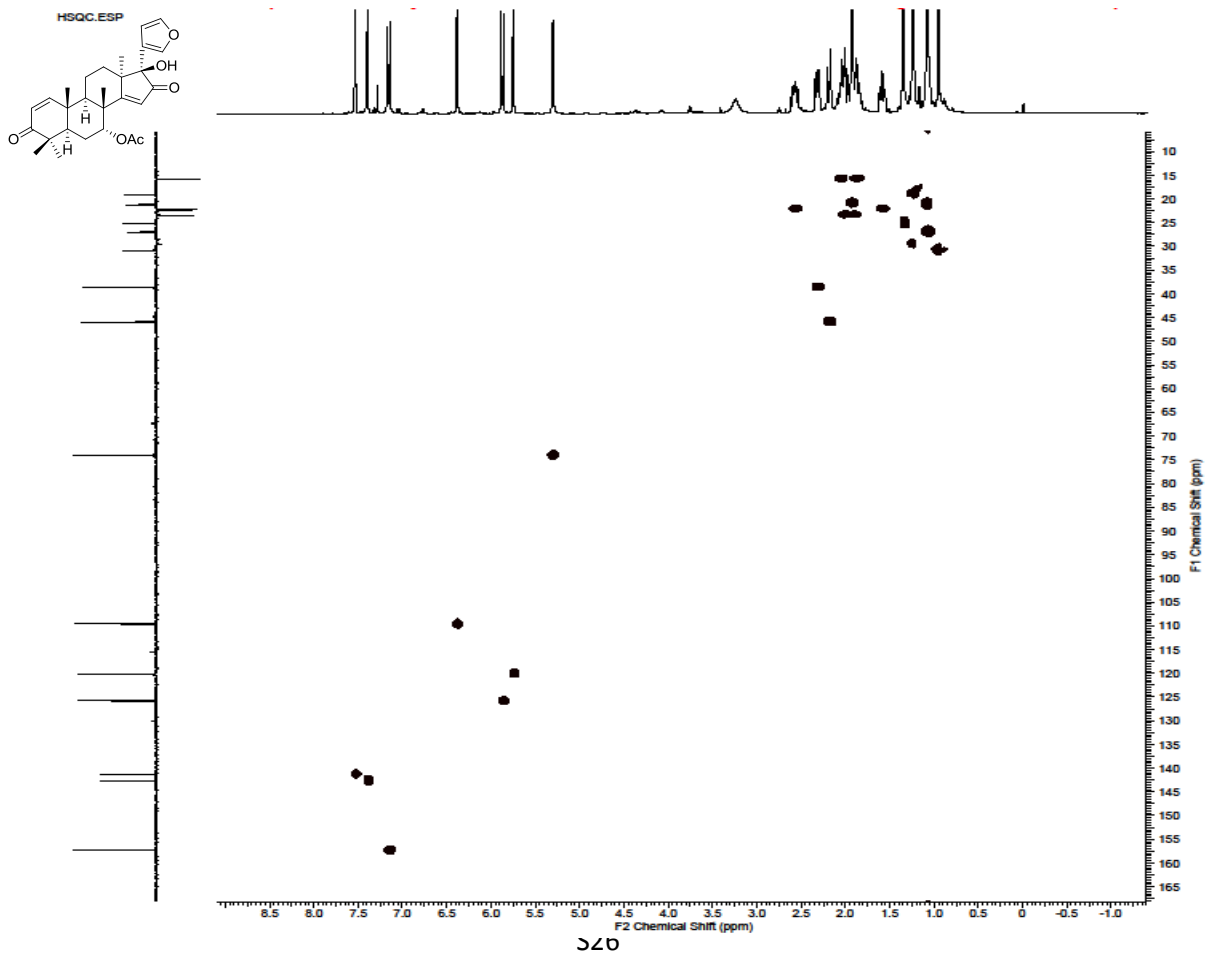

### 12 $\beta$ -Hydroxyazadiradione (3)

12 $\beta$ -Hydroxyazadiradione\_1H.ESP

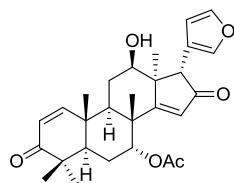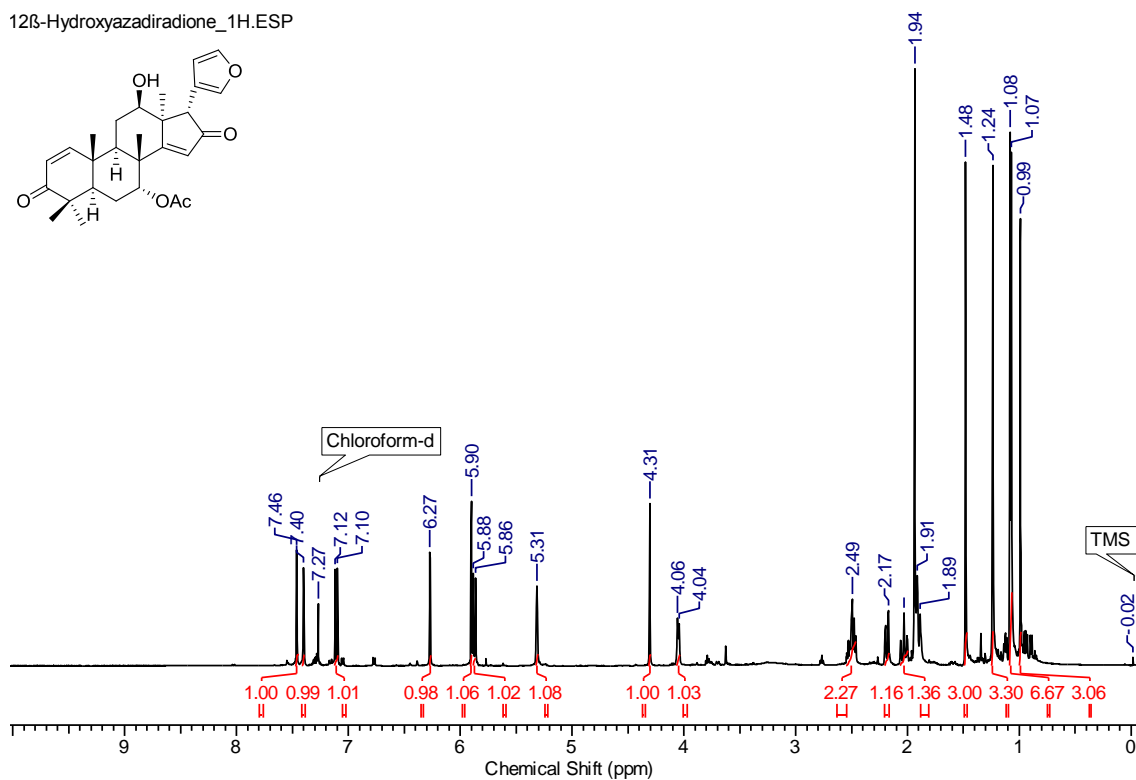

12 $\beta$ -Hydroxyazadiradione\_13C.ESP

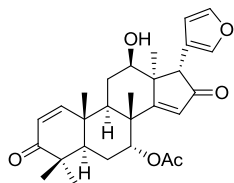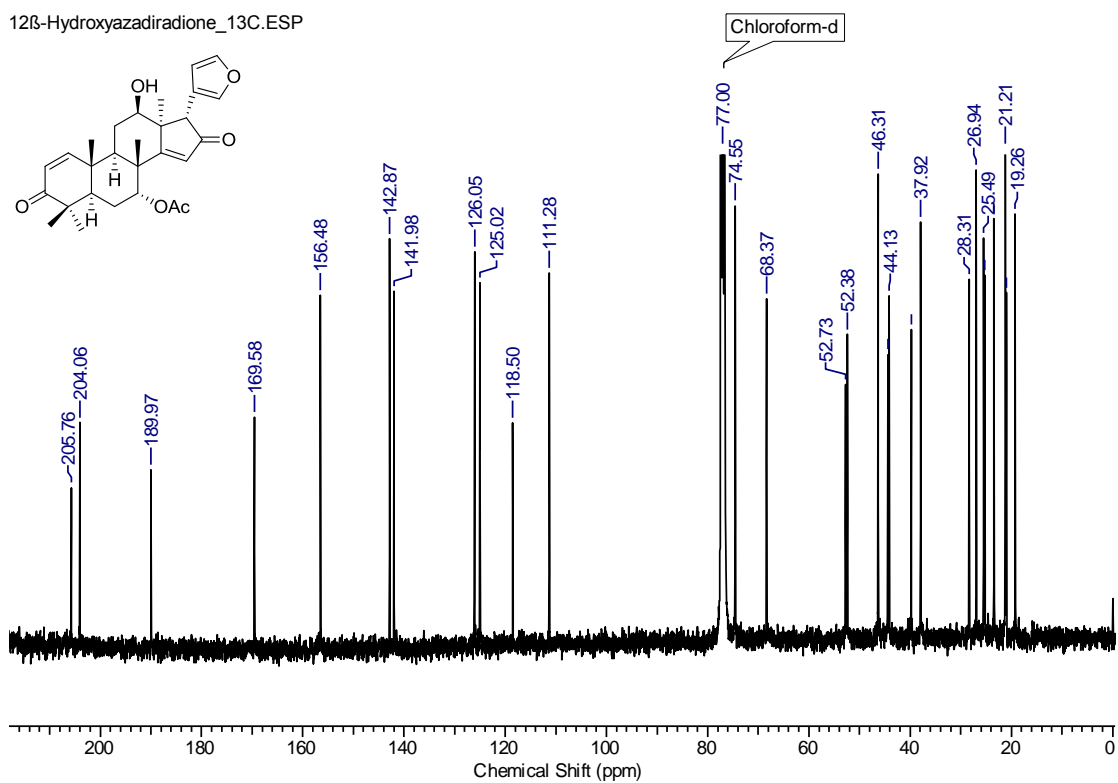

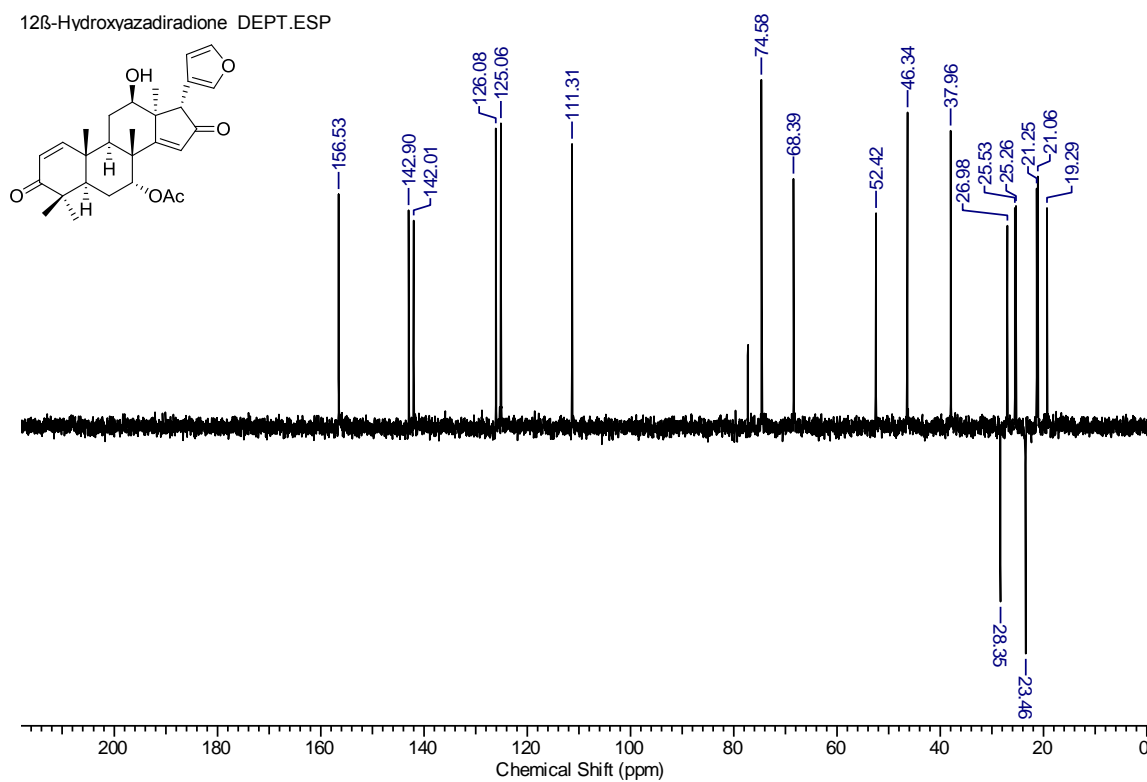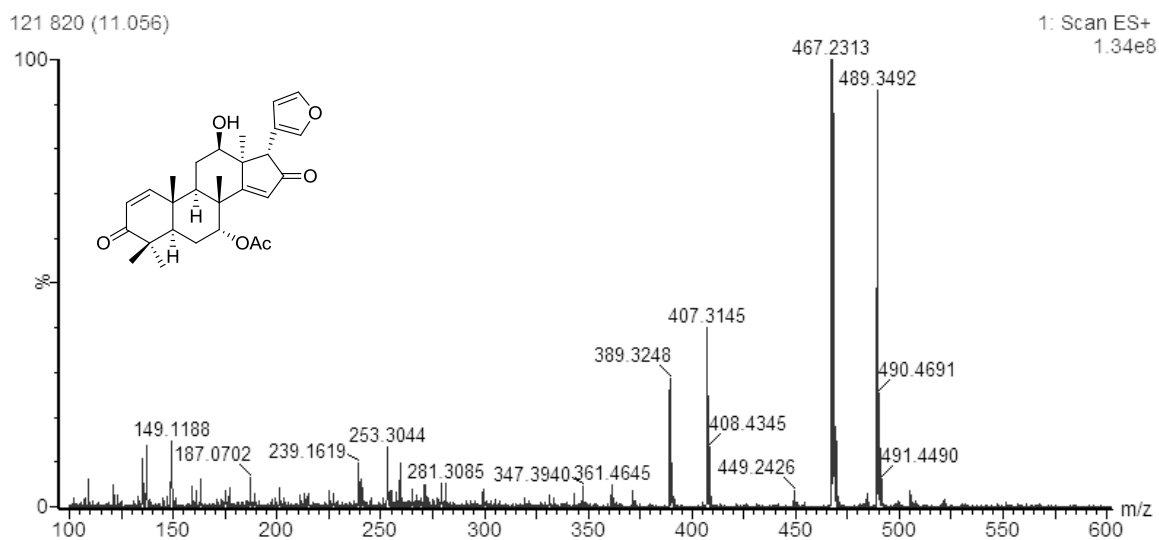

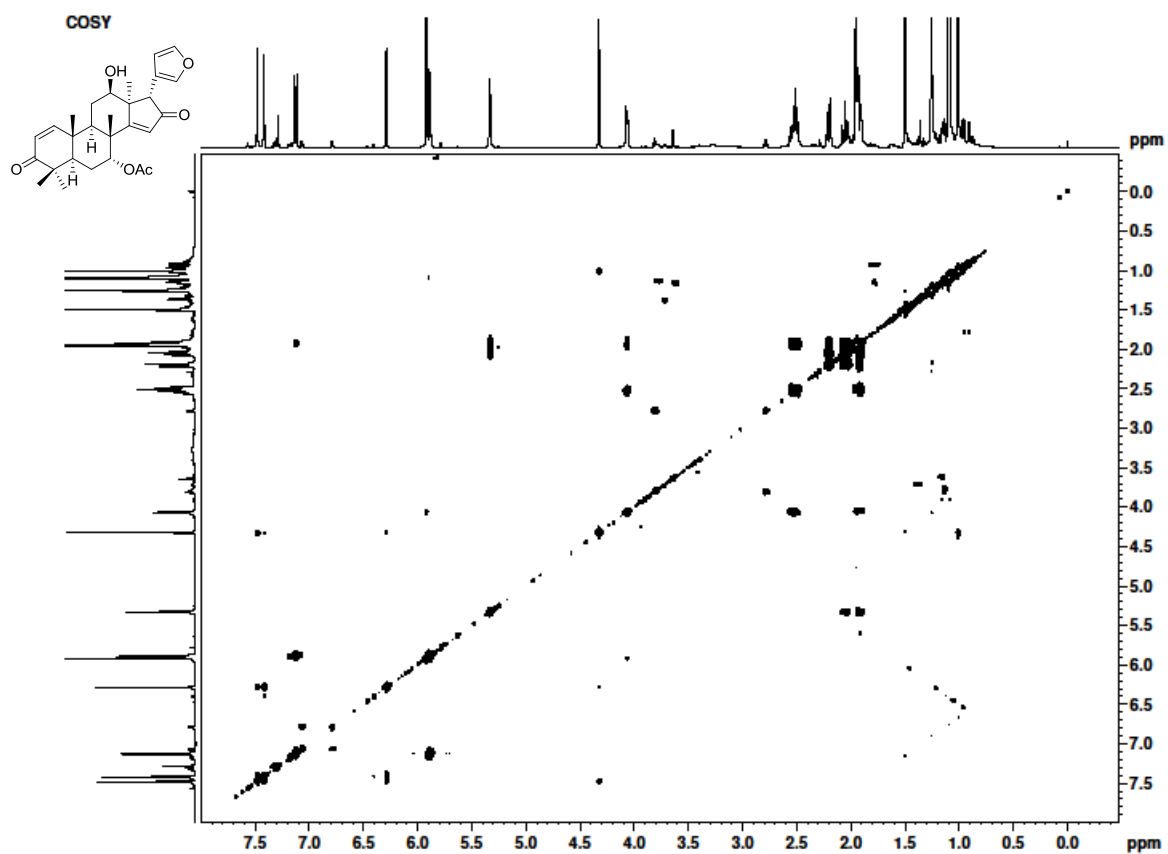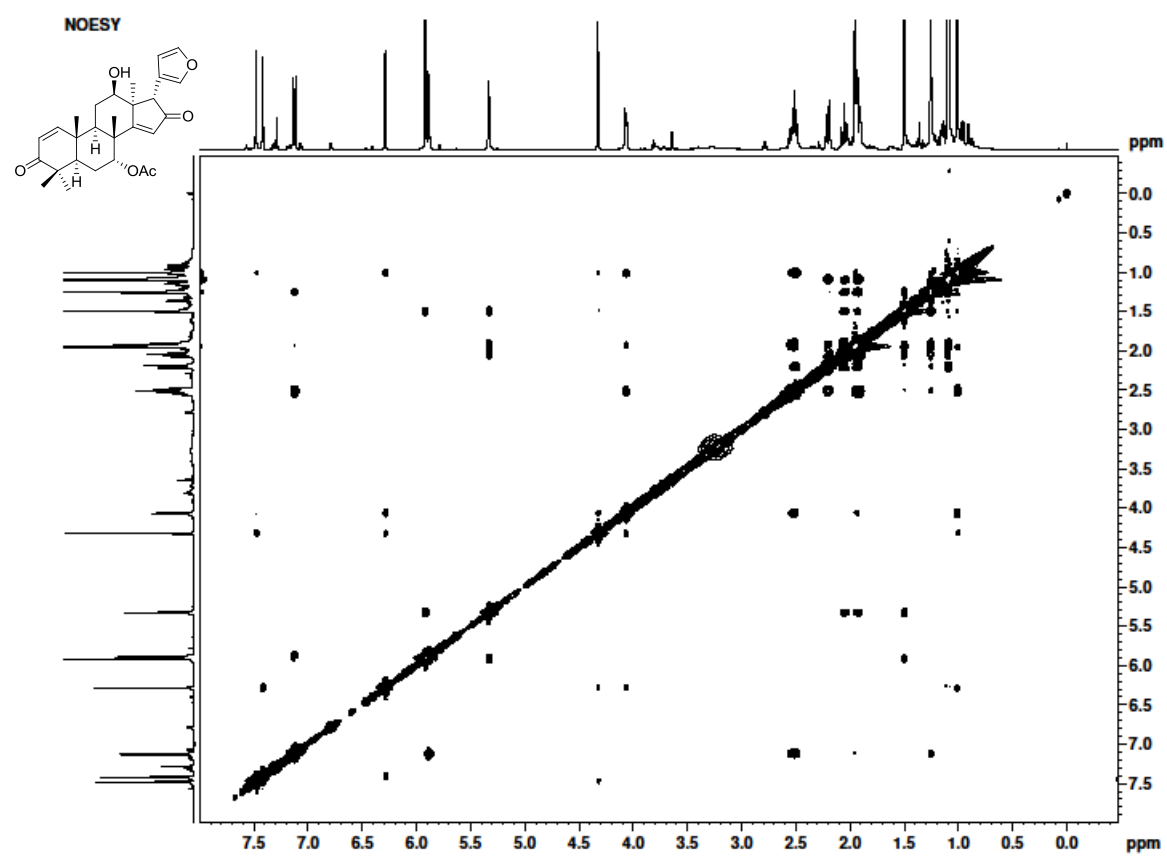

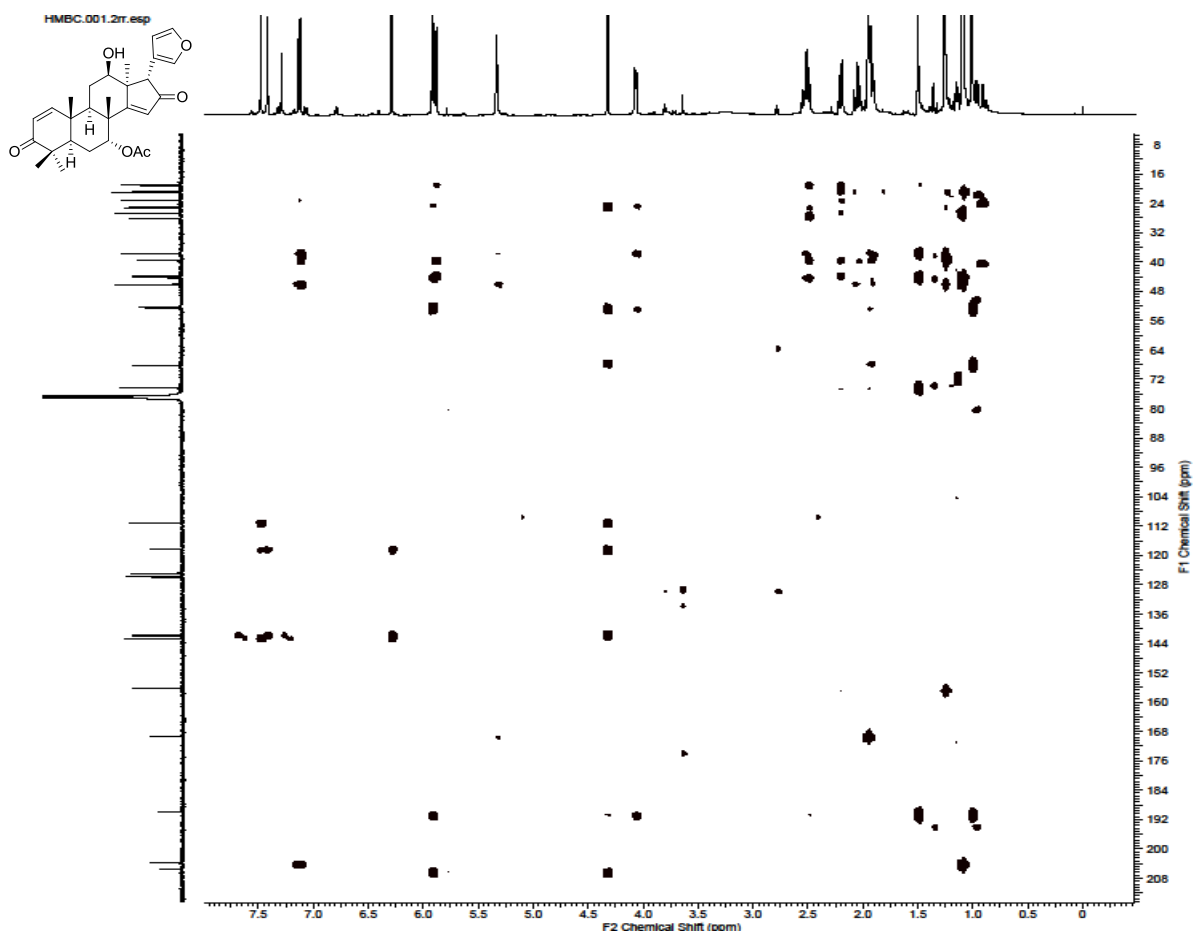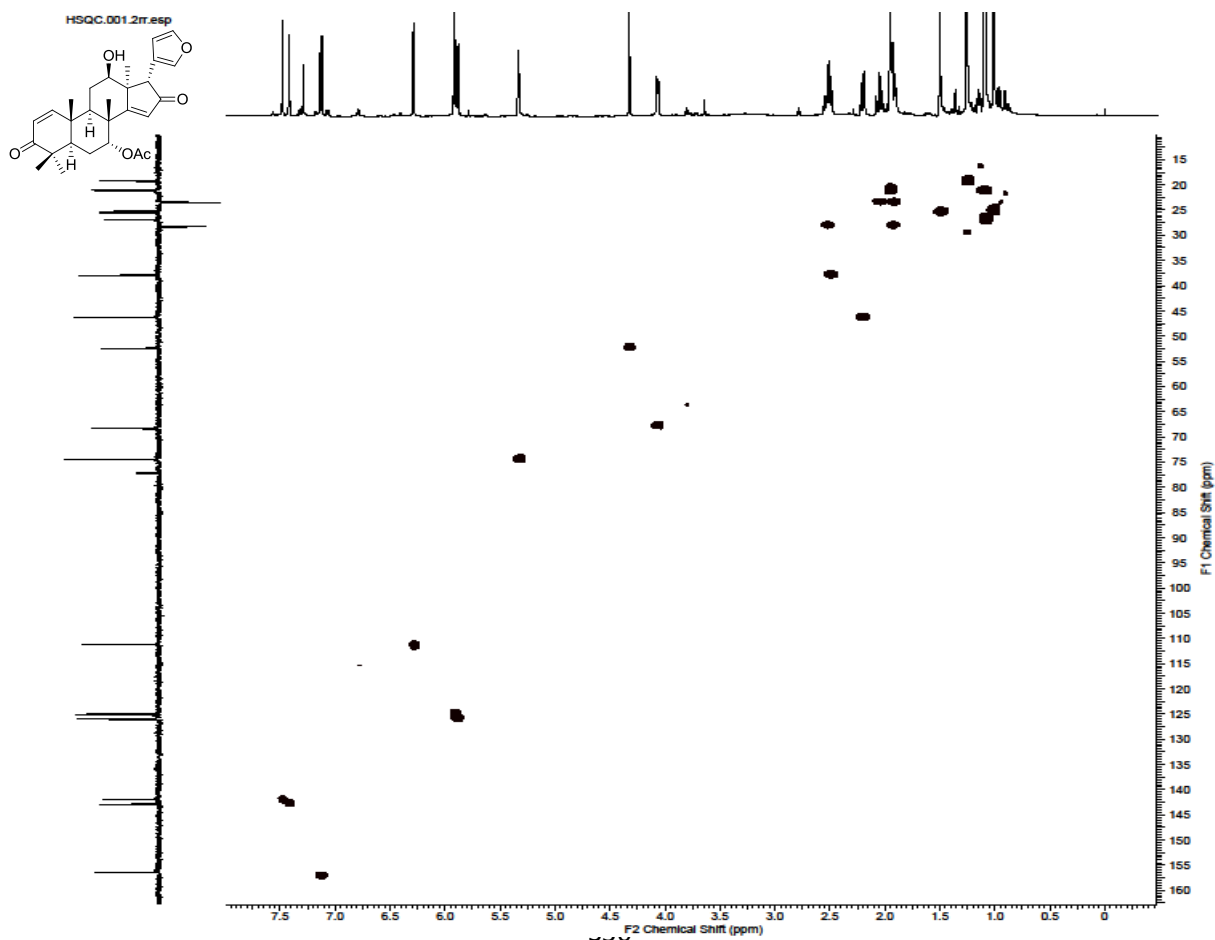

## 1,2-Dihydroazadiradione (4)

1,2-Dihydroazadiradione\_1H.ESP

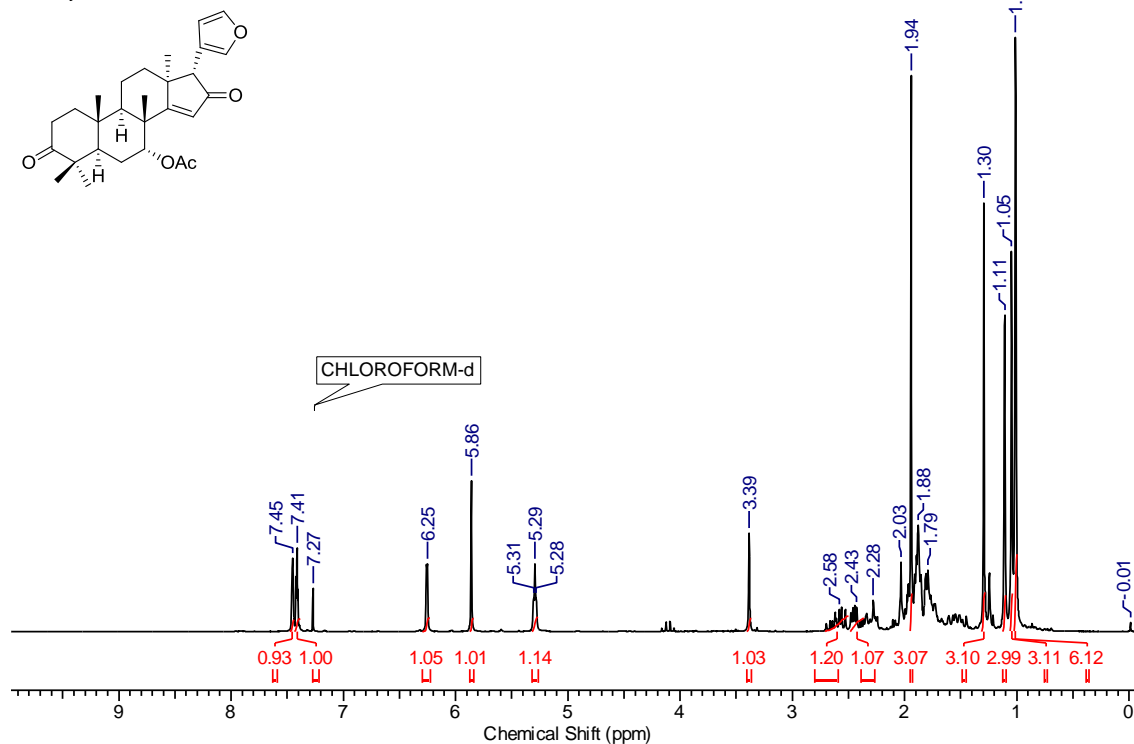

1,2-Dihydroazadiradione\_13C.ESP

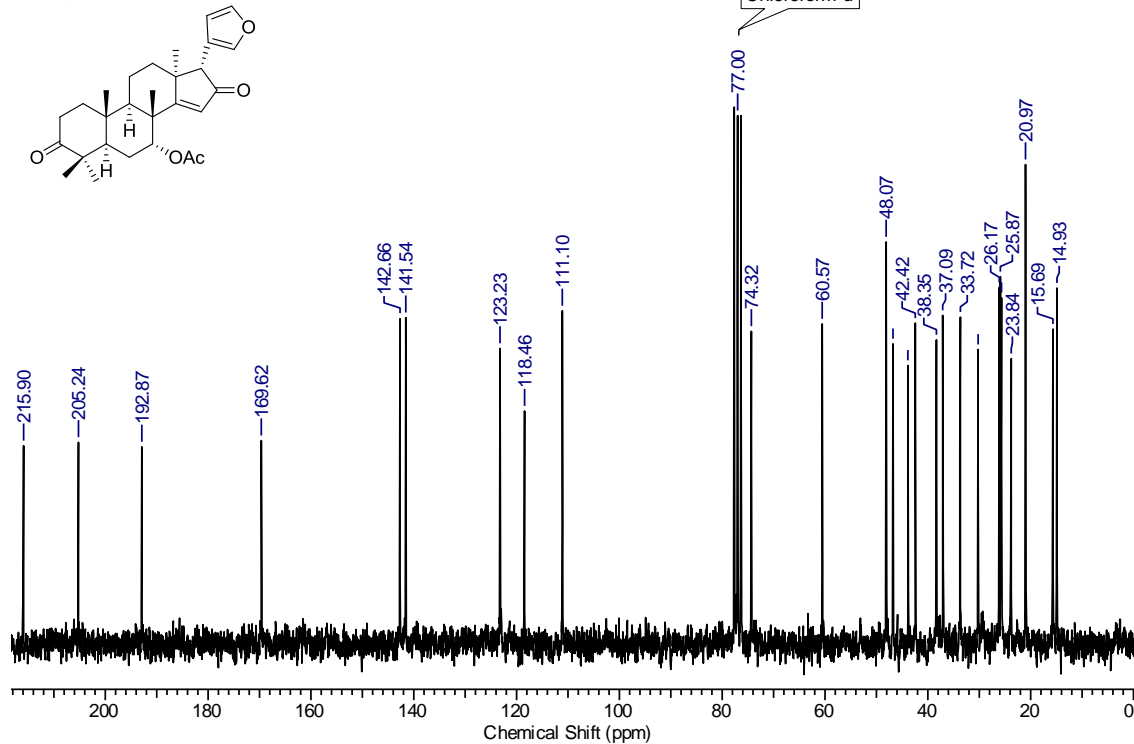

1,2-Dihydroazadiradione\_DEPT.ESP

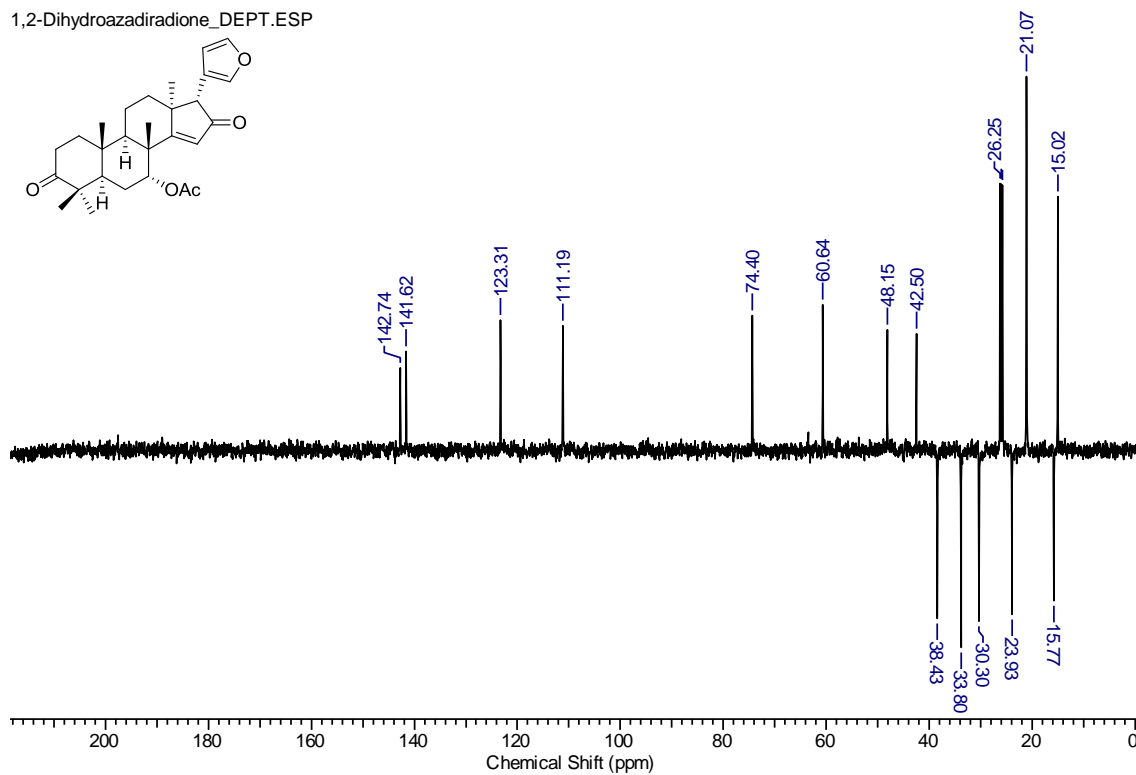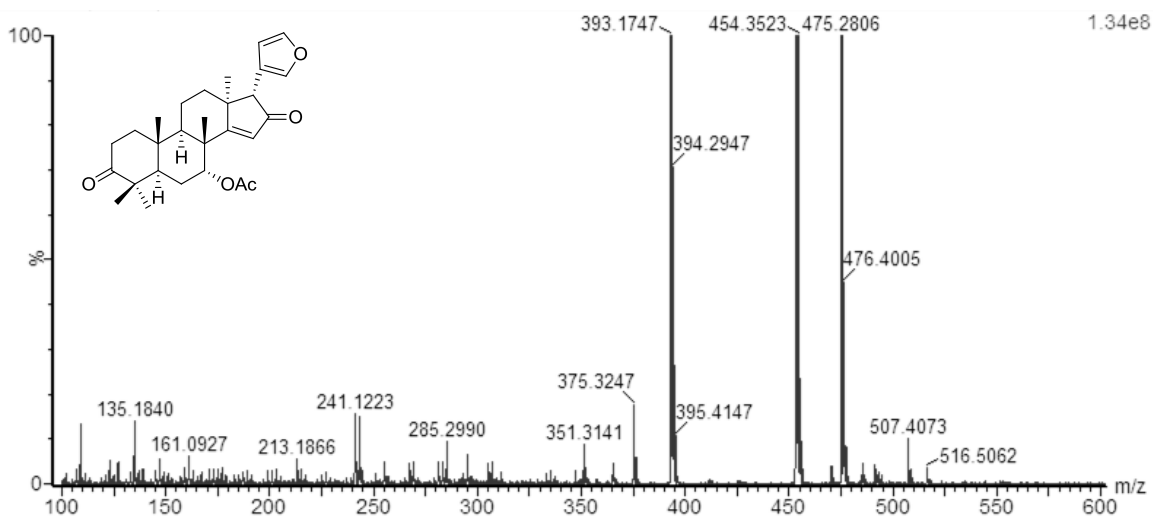

17 $\beta$ -Hydroxy-1,2-Dihydroazadiradione (5)



17 $\beta$ -Hydroxy-1,2-Dihydroazadiradione\_1H.ESP

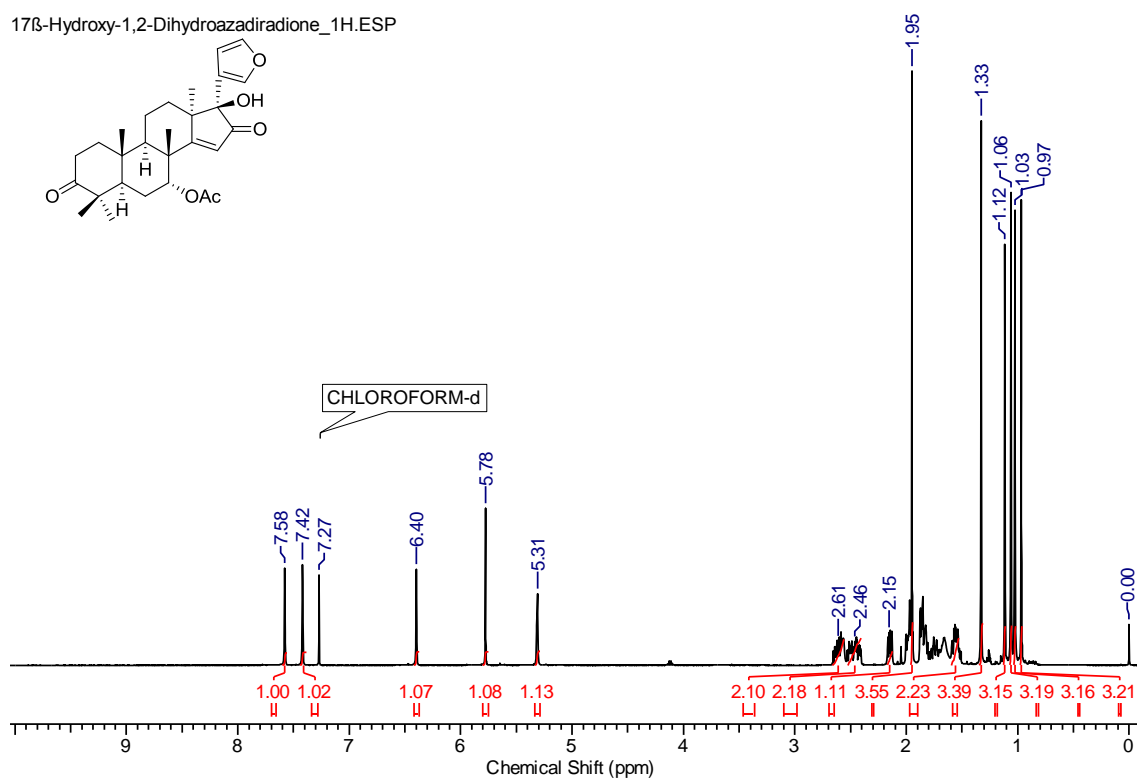

17 $\beta$ -Hydroxy-1,2-Dihydroazadiradione\_13C.ESP

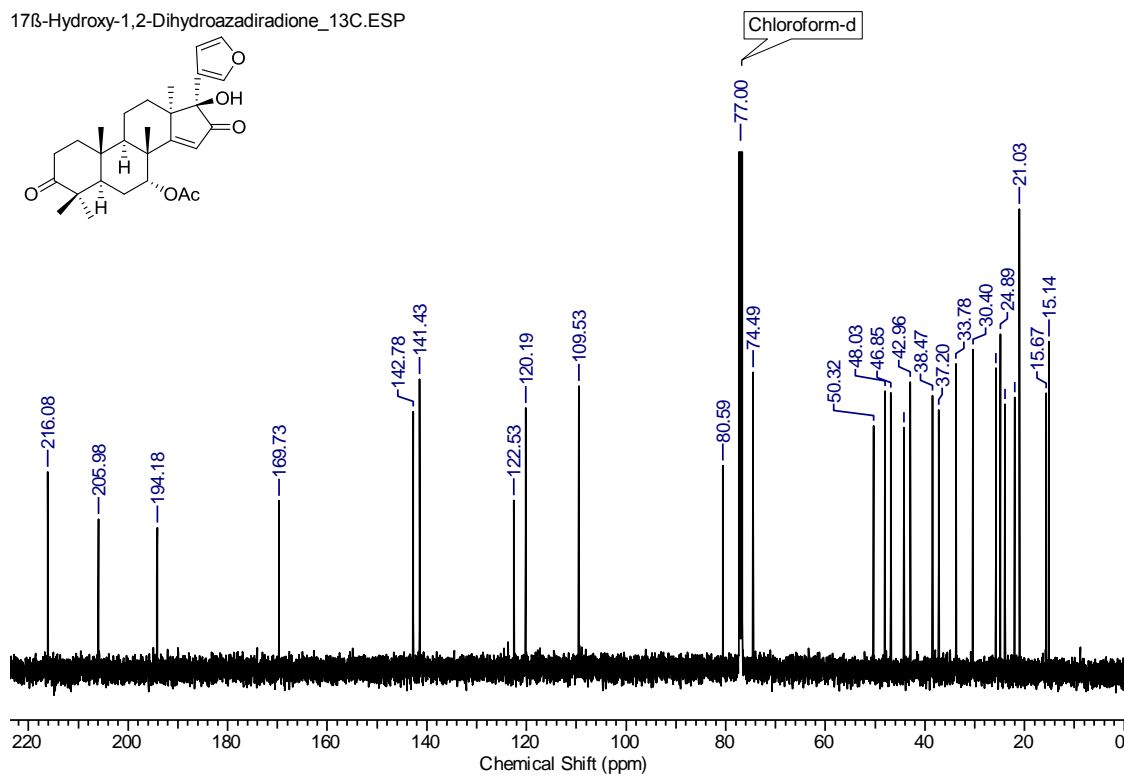

17 $\beta$ -Hydroxy-1,2-Dihydroazadiradione\_DEPT.ESP

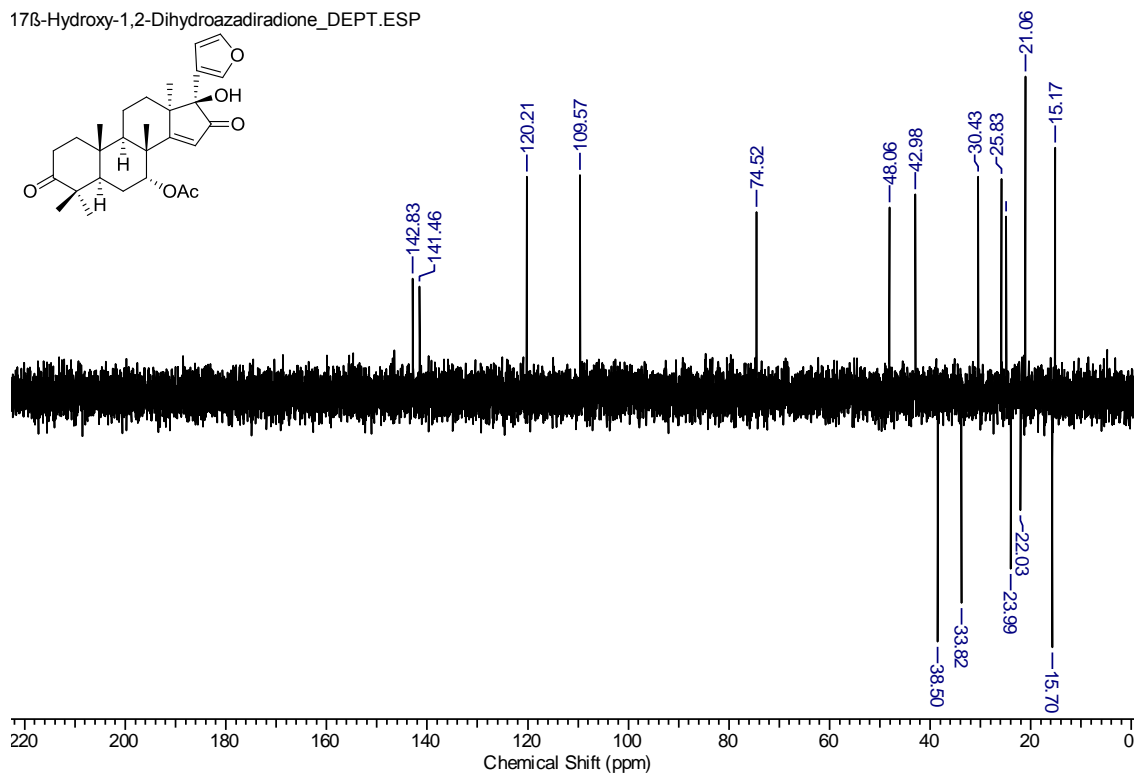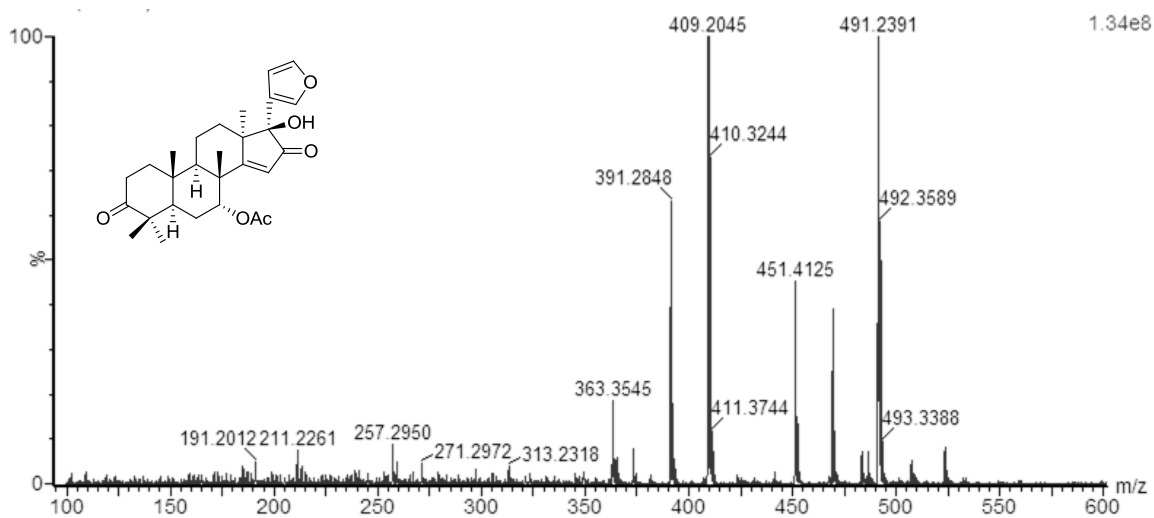

12 $\beta$ -Hydroxy-1,2-Dihydroazadiradione (6)

12 $\beta$ -Hydroxy-1,2-Dihydroazadiradione\_1H.ESP

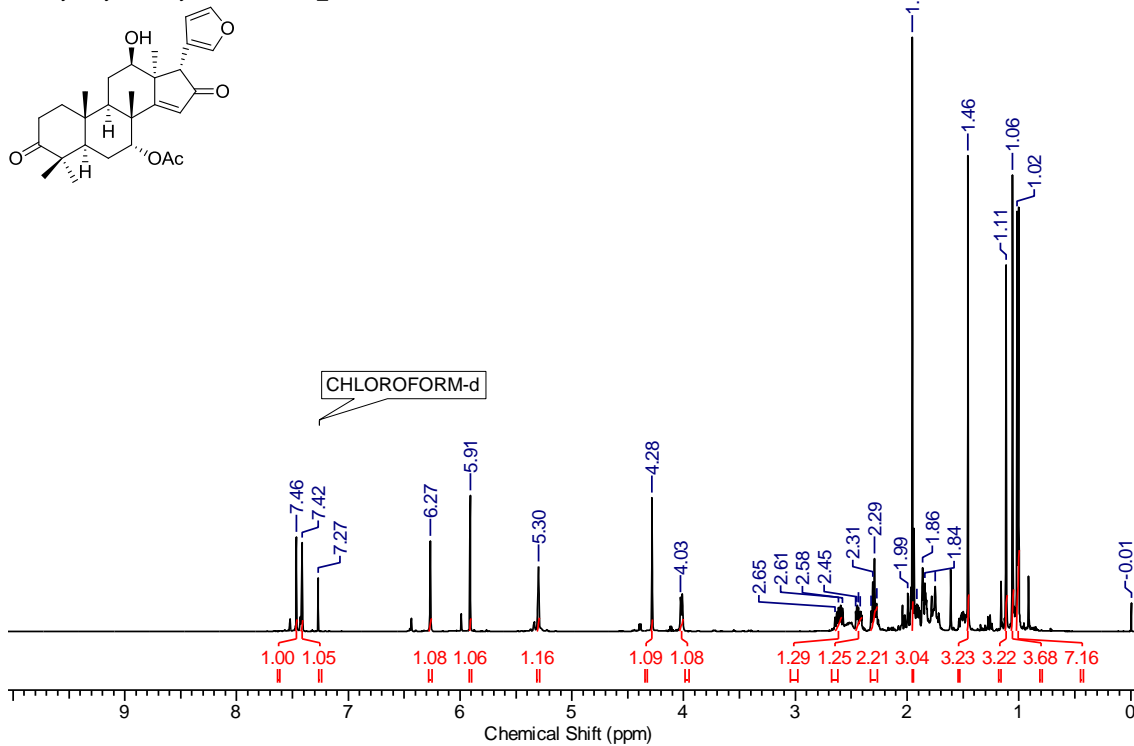

12 $\beta$ -Hydroxy-1,2-Dihydroazadiradione\_13C.ESP

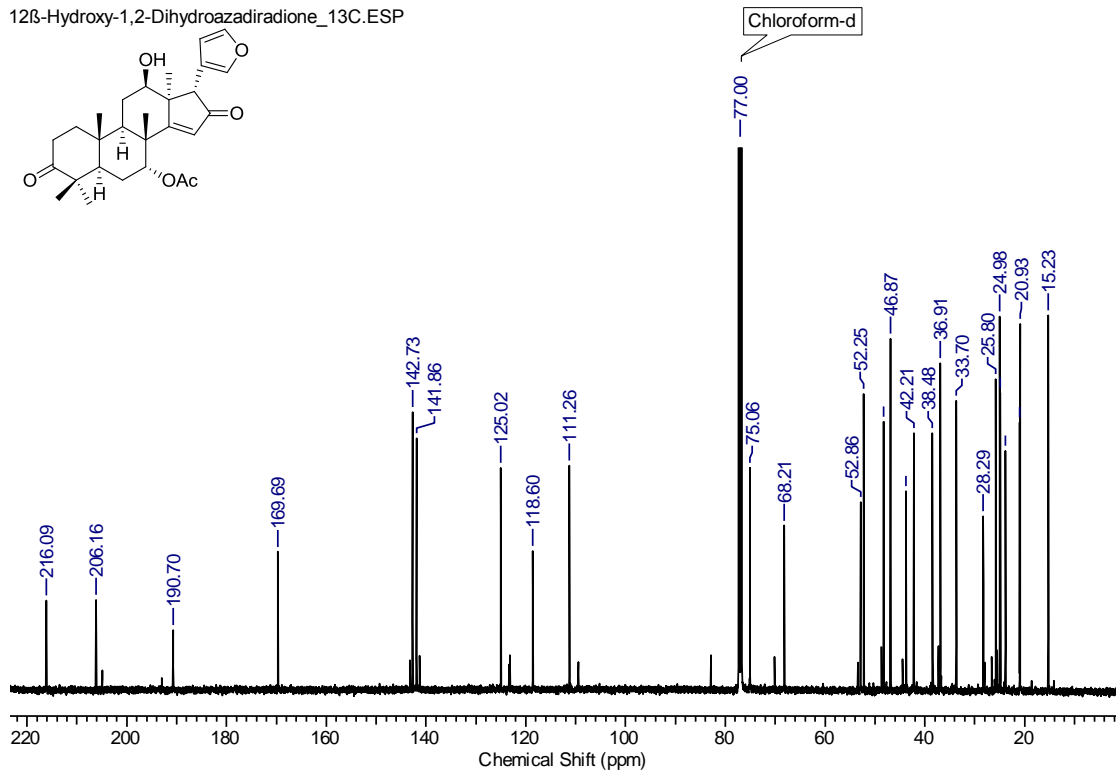

12 $\beta$ -Hydroxy-1,2-Dihydroazadiradione\_DEPT.ESP

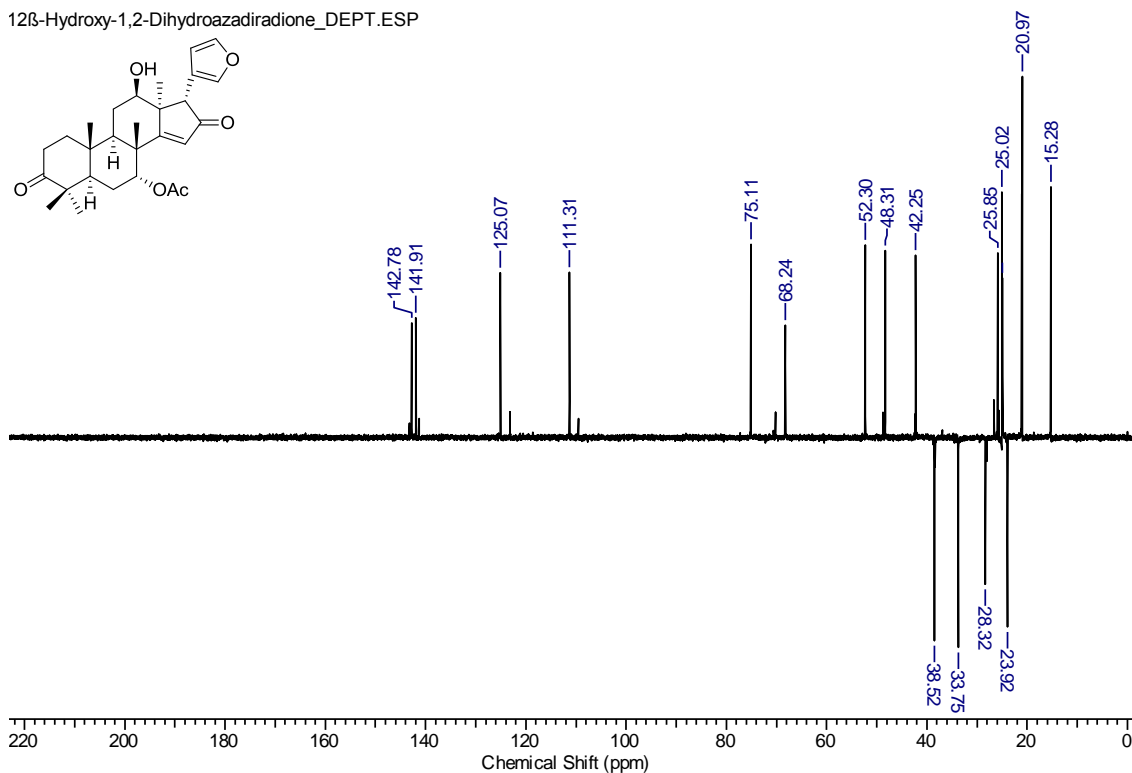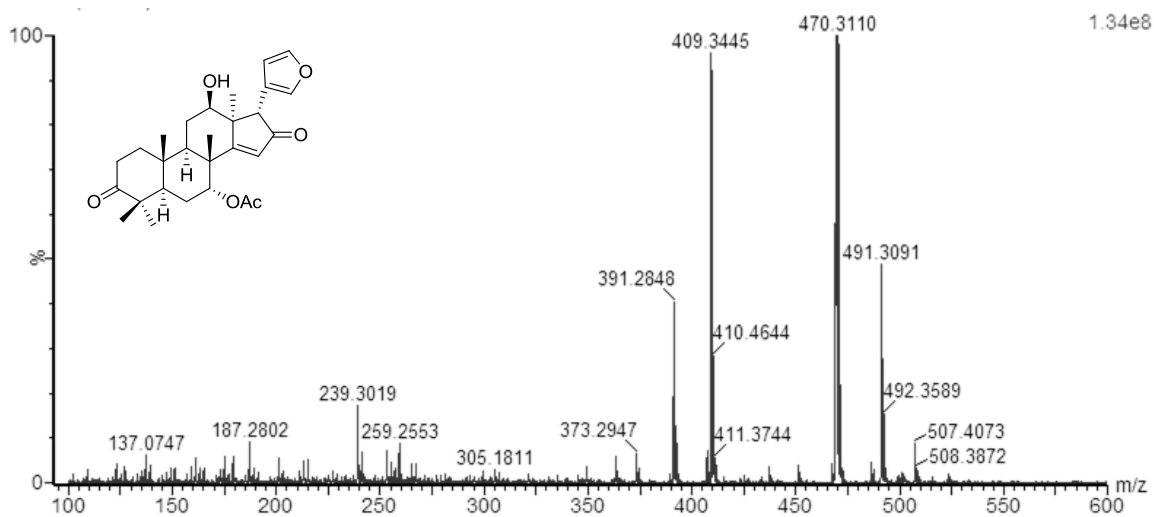

## 1,2 $\alpha$ -Epoxyazadiradione (**7**)

1,2-Epoxyazadiradione\_1H.ESP

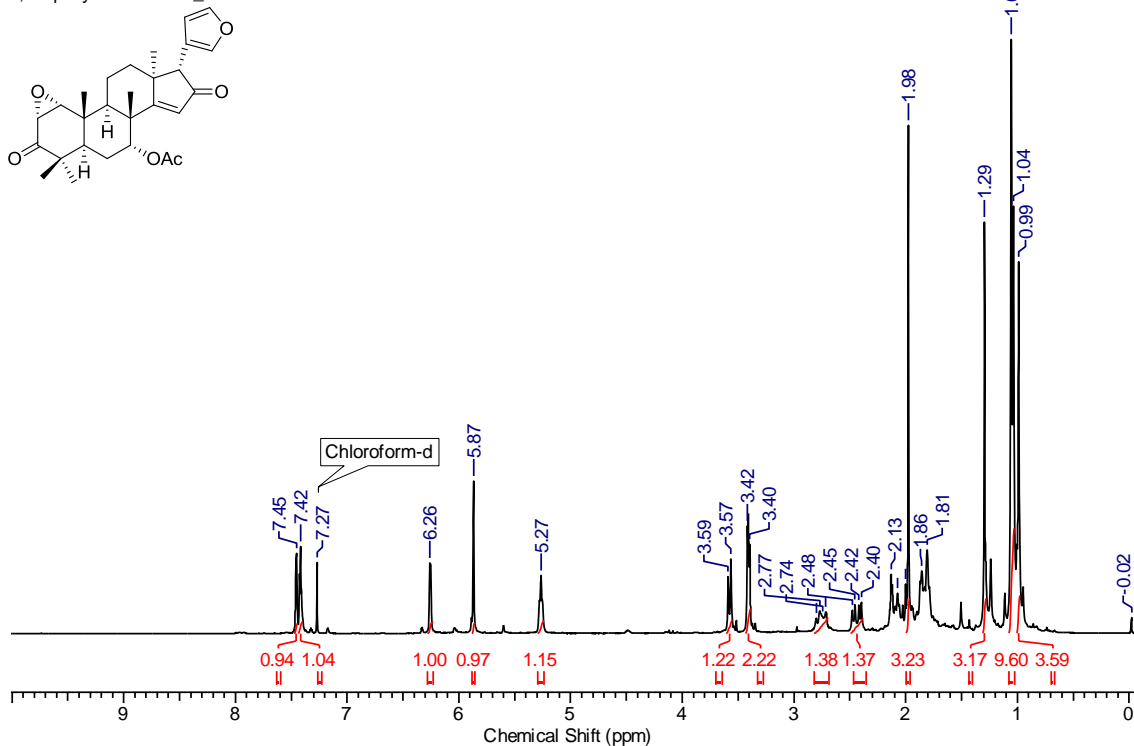

1,2-Epoxyazadiradione\_13C.ESP

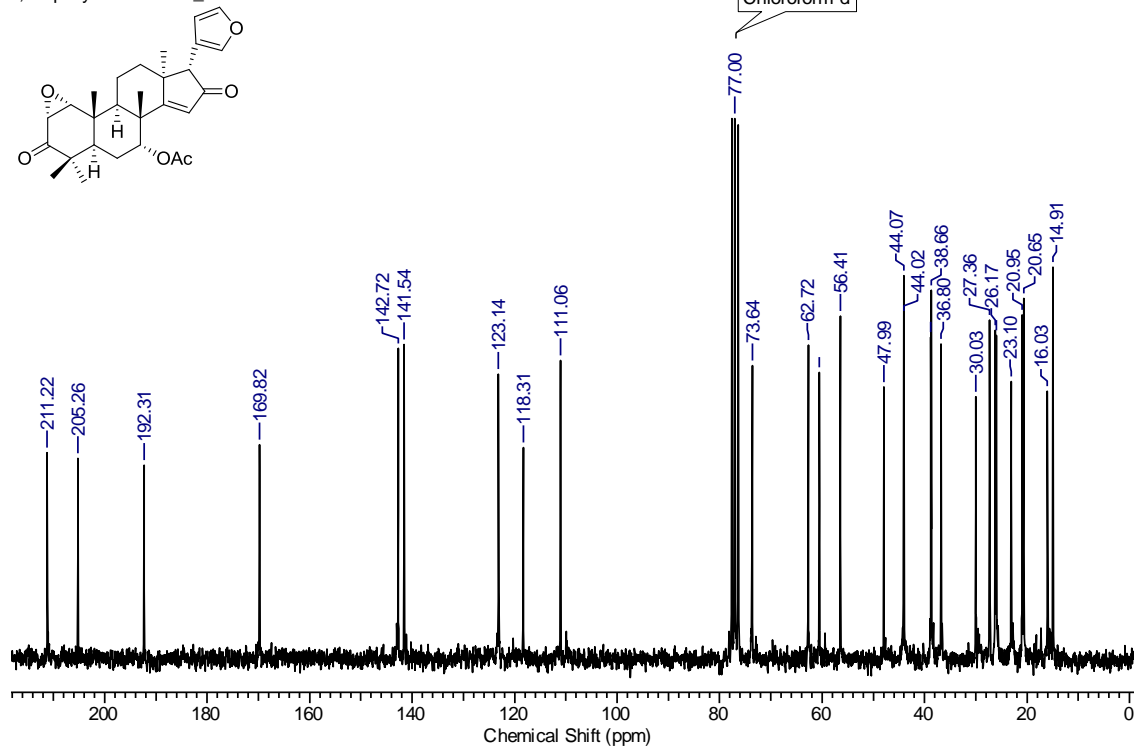

1,2-Epoxyazadiradione\_DEPT.ESP

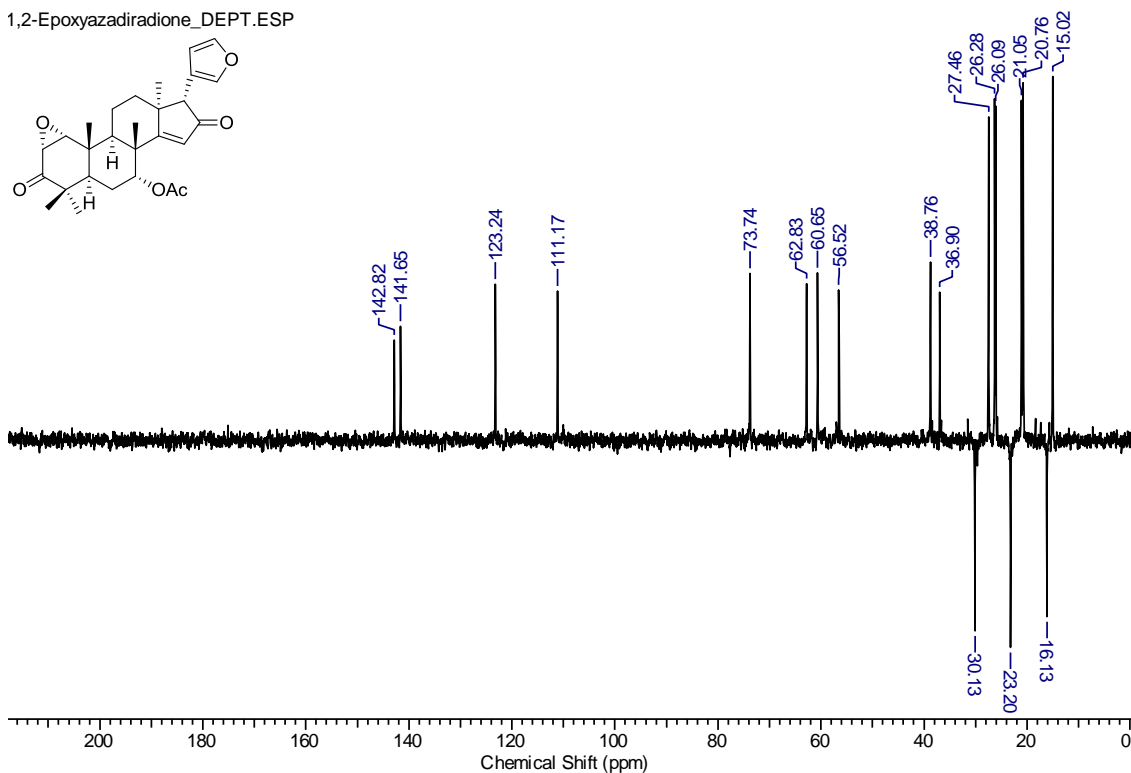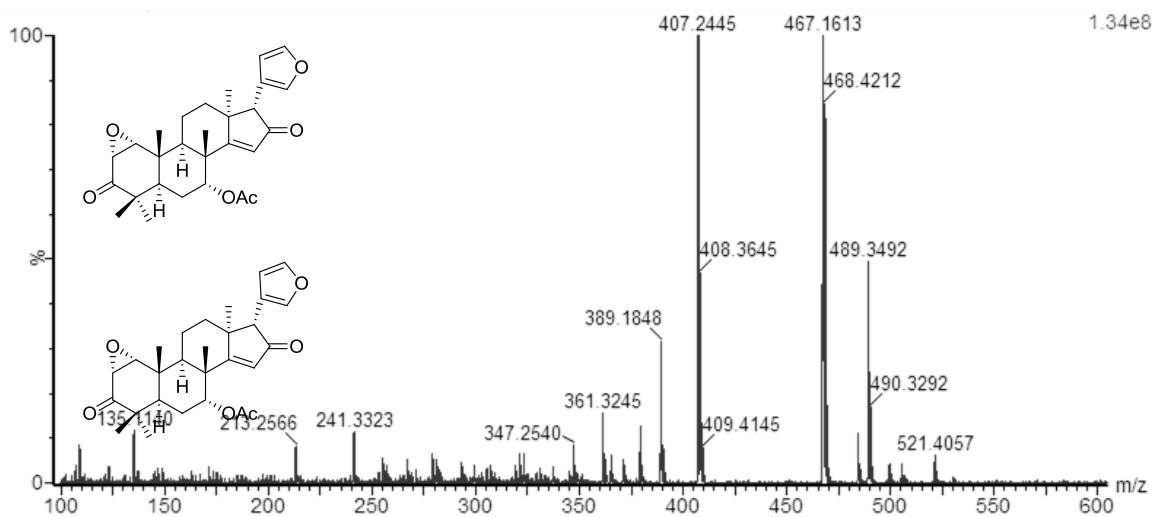

## 17 $\beta$ -Hydroxy-1,2 $\alpha$ -Epoxyazadiradione (**8**)

17 $\beta$ -Hydroxy-1,2-Epoxyazadiradione\_1H.ESP

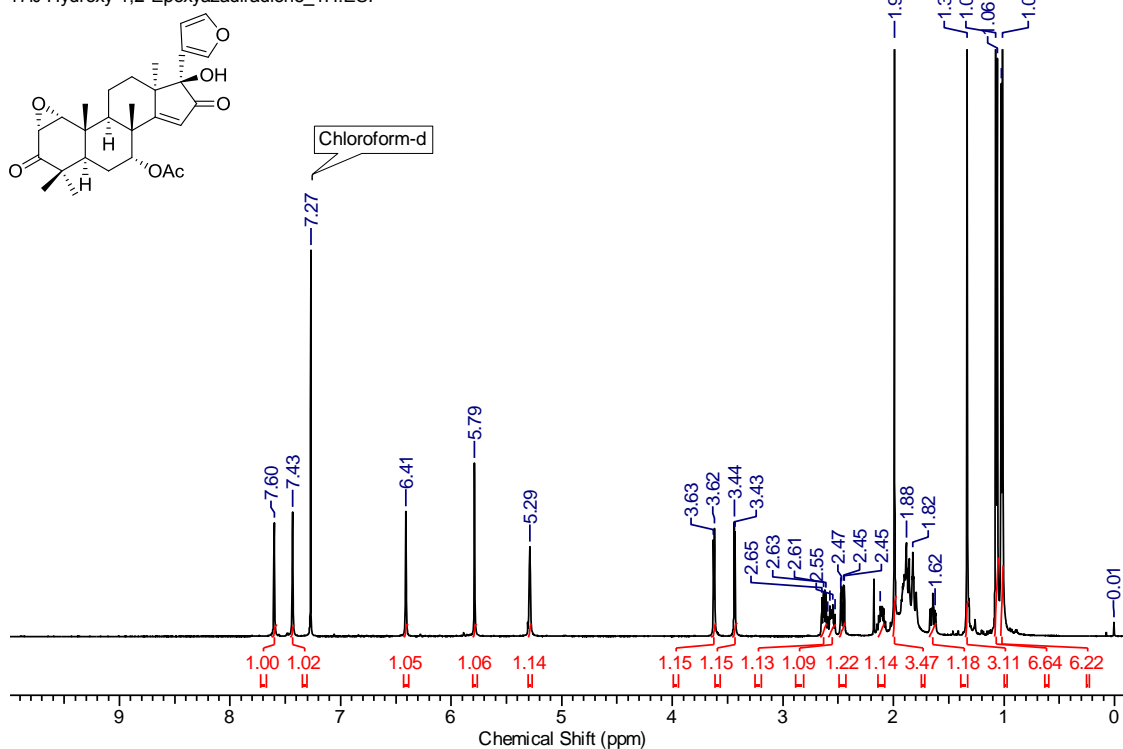

17 $\beta$ -Hydroxy-1,2-Epoxyazadiradione\_13C.ESP

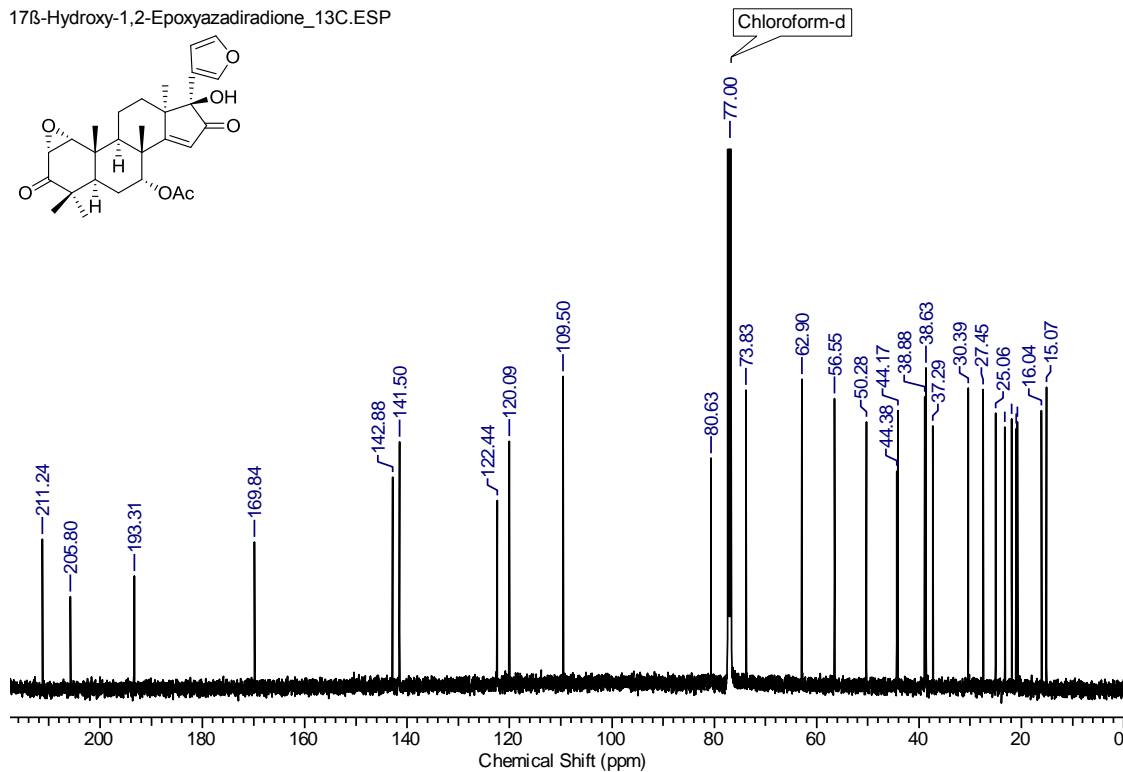

17 $\beta$ -Hydroxy-1,2-Epoxyazadiradione\_DEPT.ESP

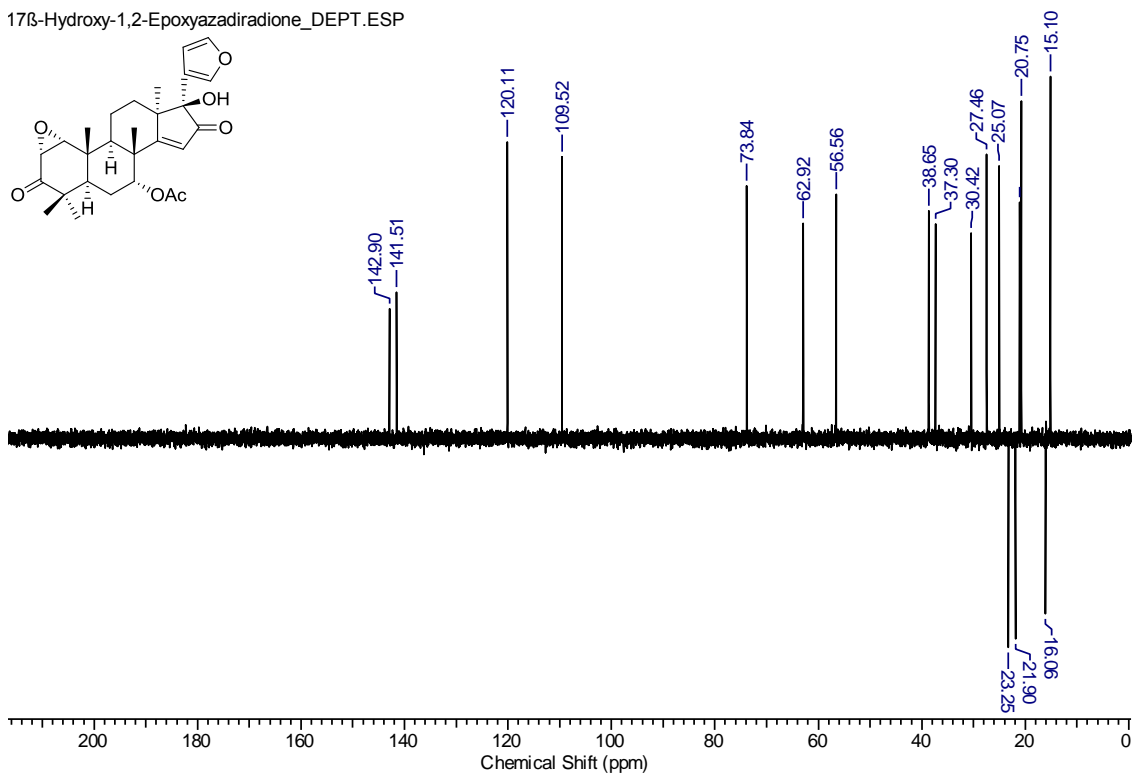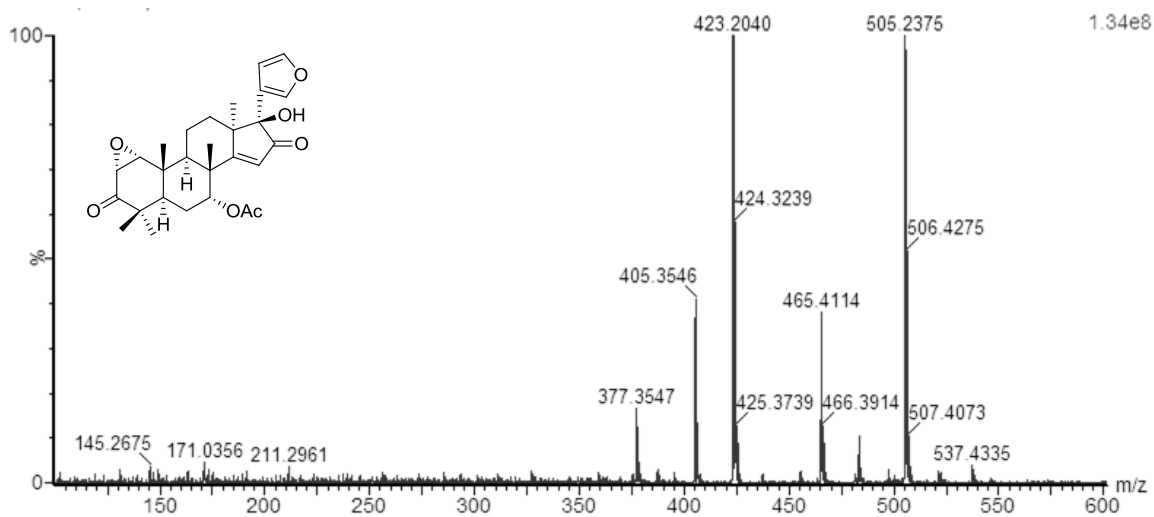



## 12 $\beta$ -Hydroxy-1,2 $\alpha$ -Epoxyzadiradione (9)

12 $\beta$ -Hydroxy-1,2-Epoxyzadiradione\_1H.ESP

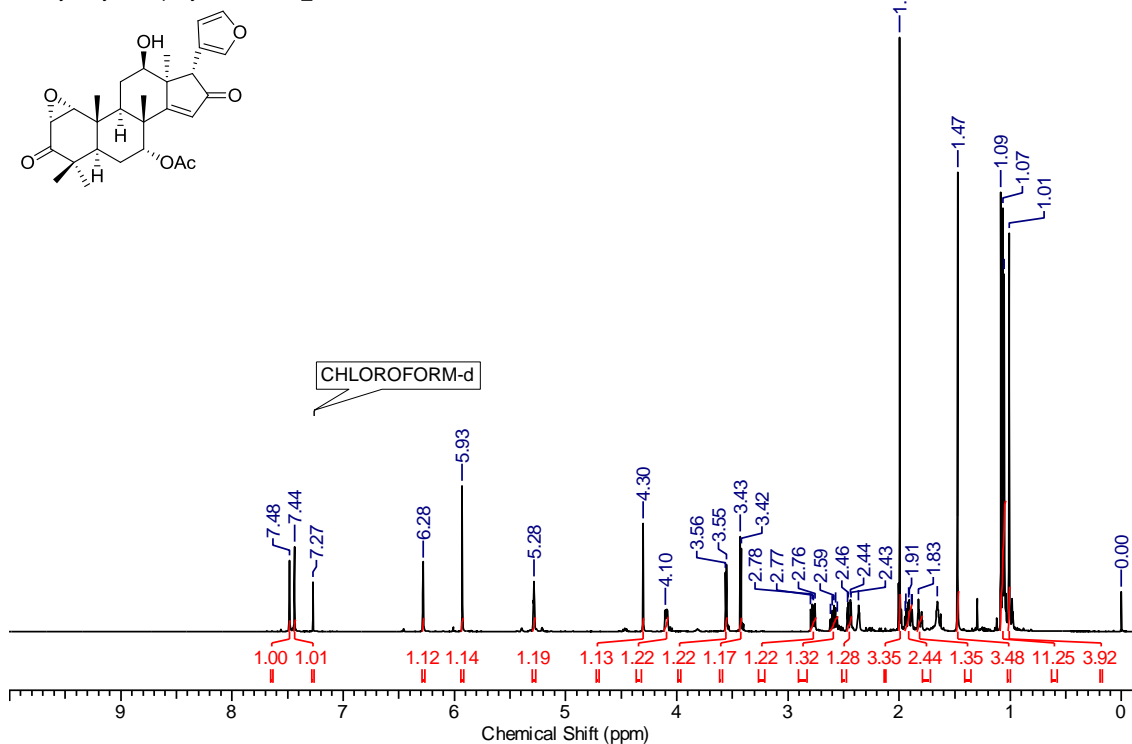

12 $\beta$ -Hydroxy-1,2-Epoxyzadiradione\_13C.ESP

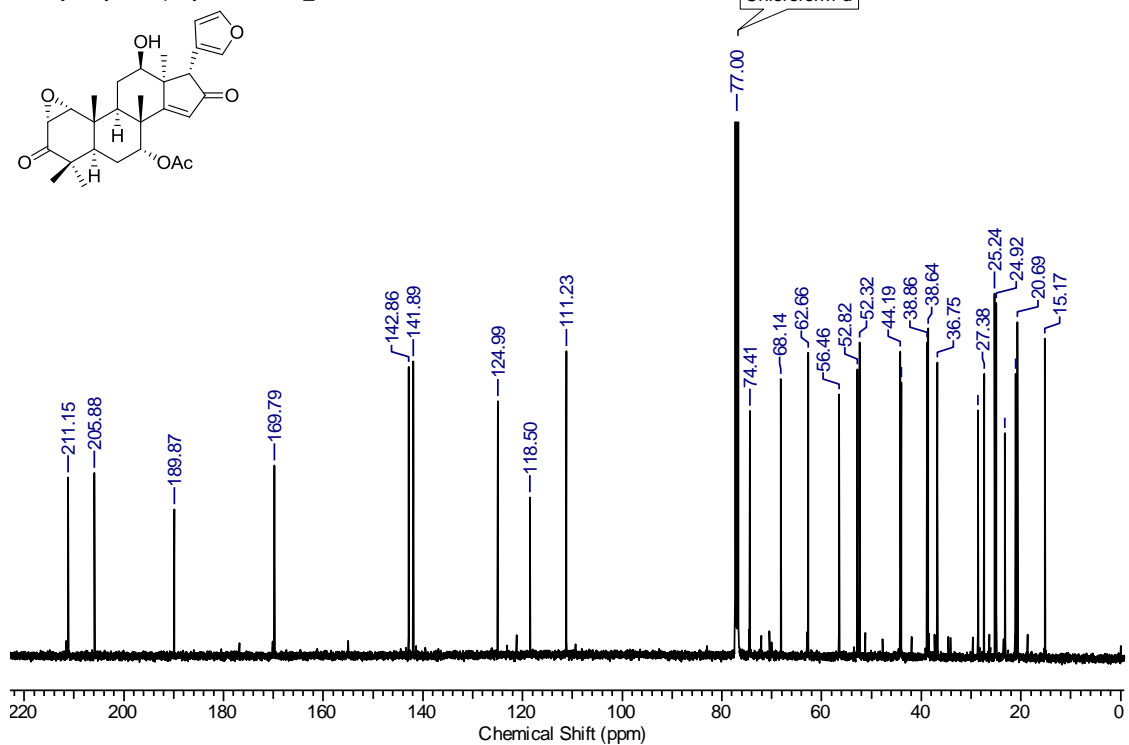

12 $\beta$ -Hydroxy-1,2-Epoxyazadiradione\_DEPT.ESP

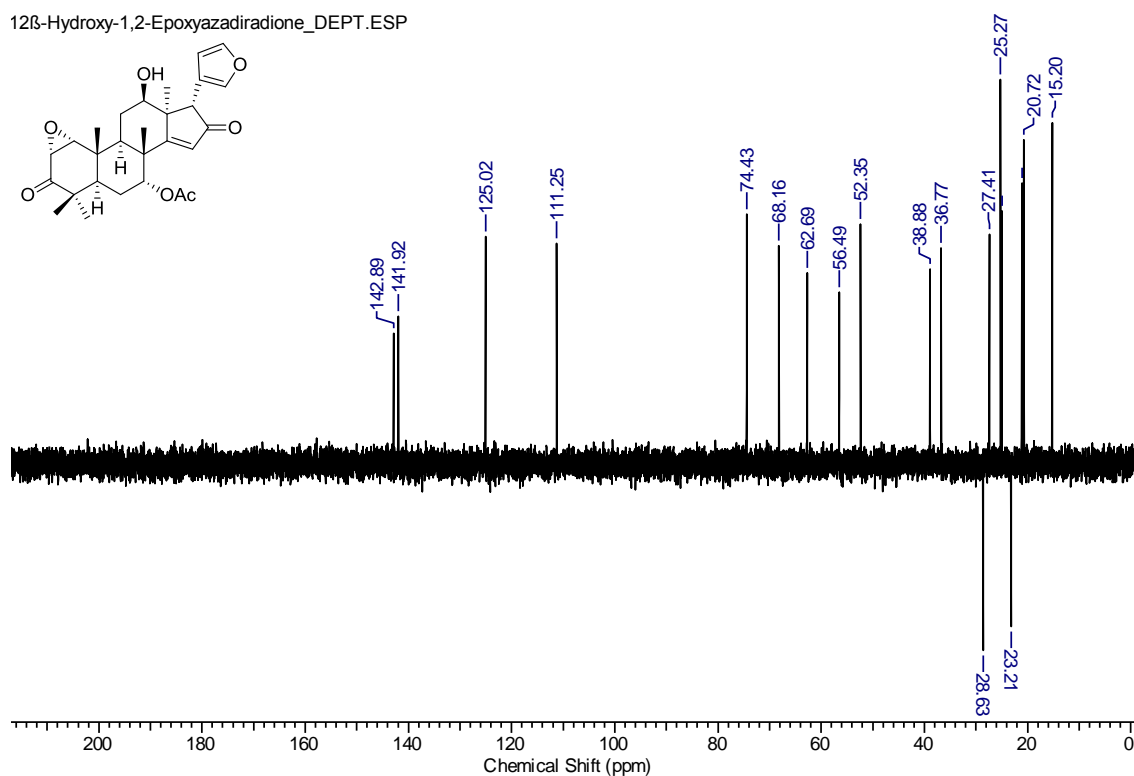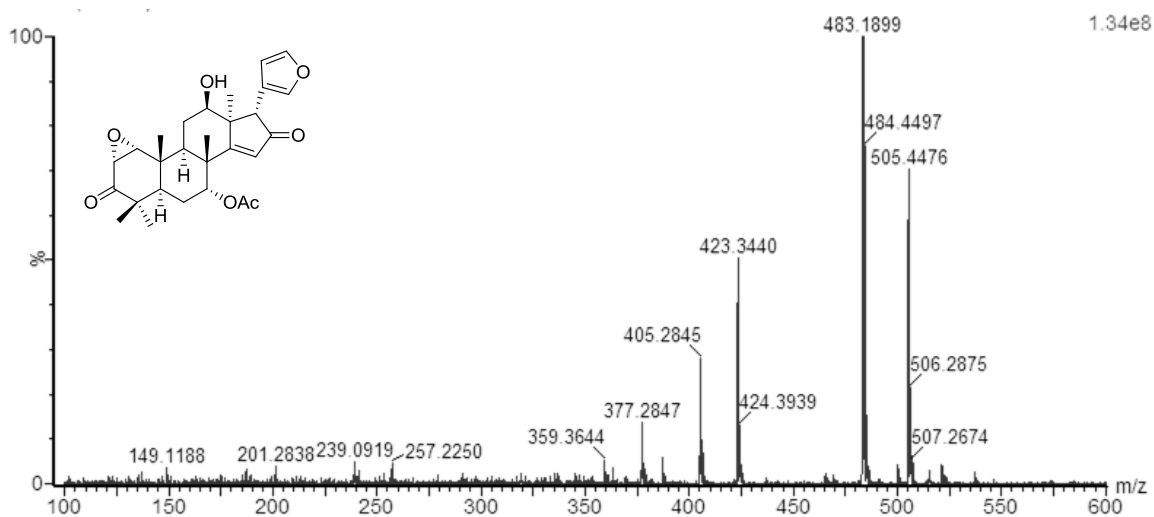

## Epoxyzadiradione (10)

Epoxyzadiradione\_1H.ESP

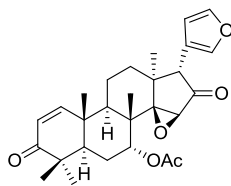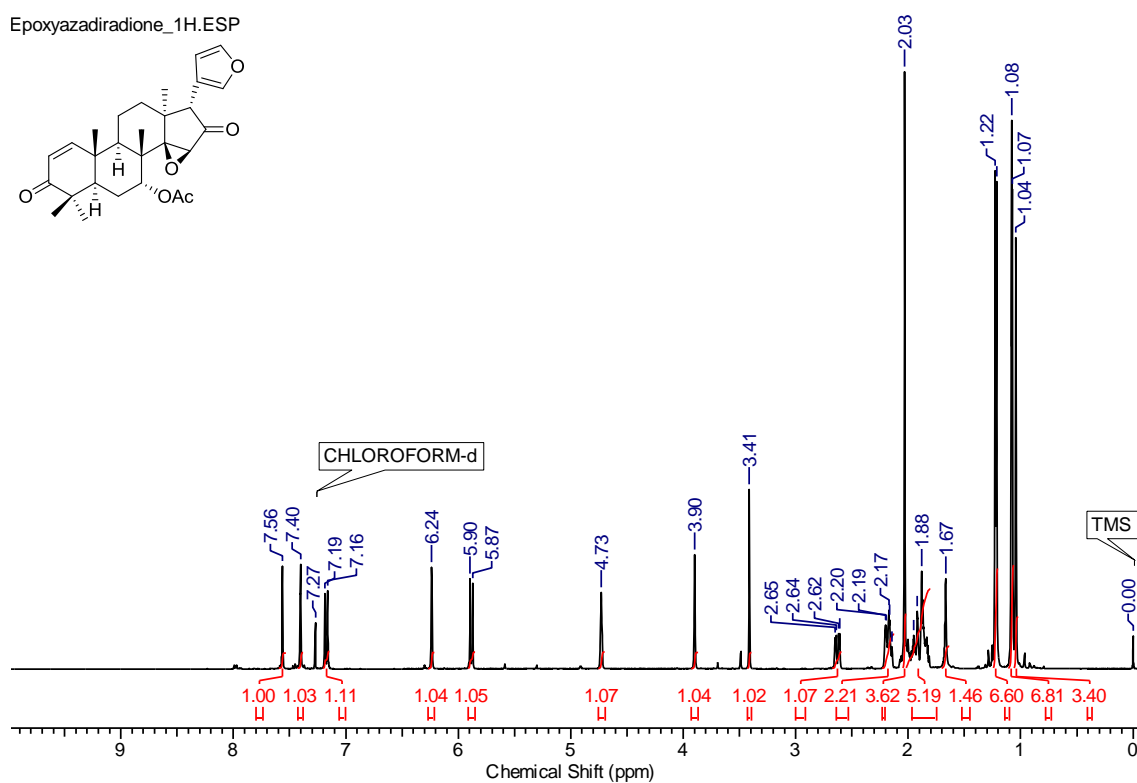

Epoxyzadiradione\_13C.ESP

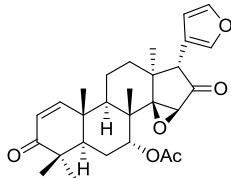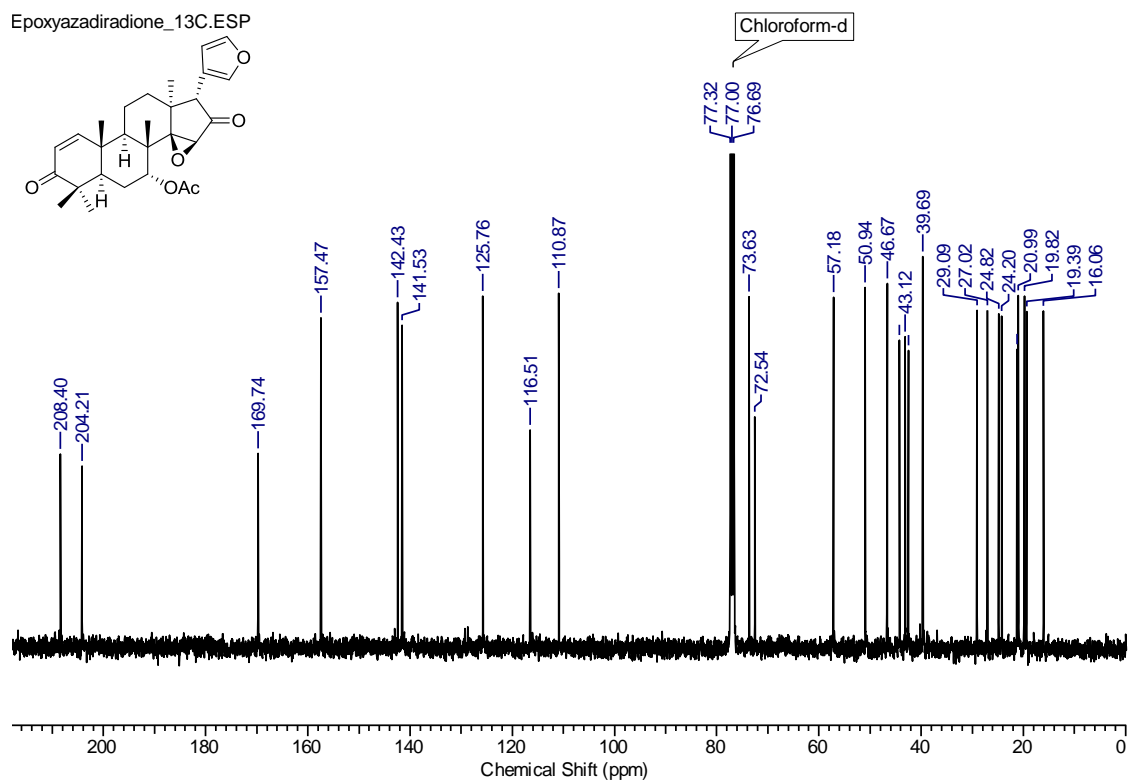

Epoxyazadiradione\_DEPT.ESP

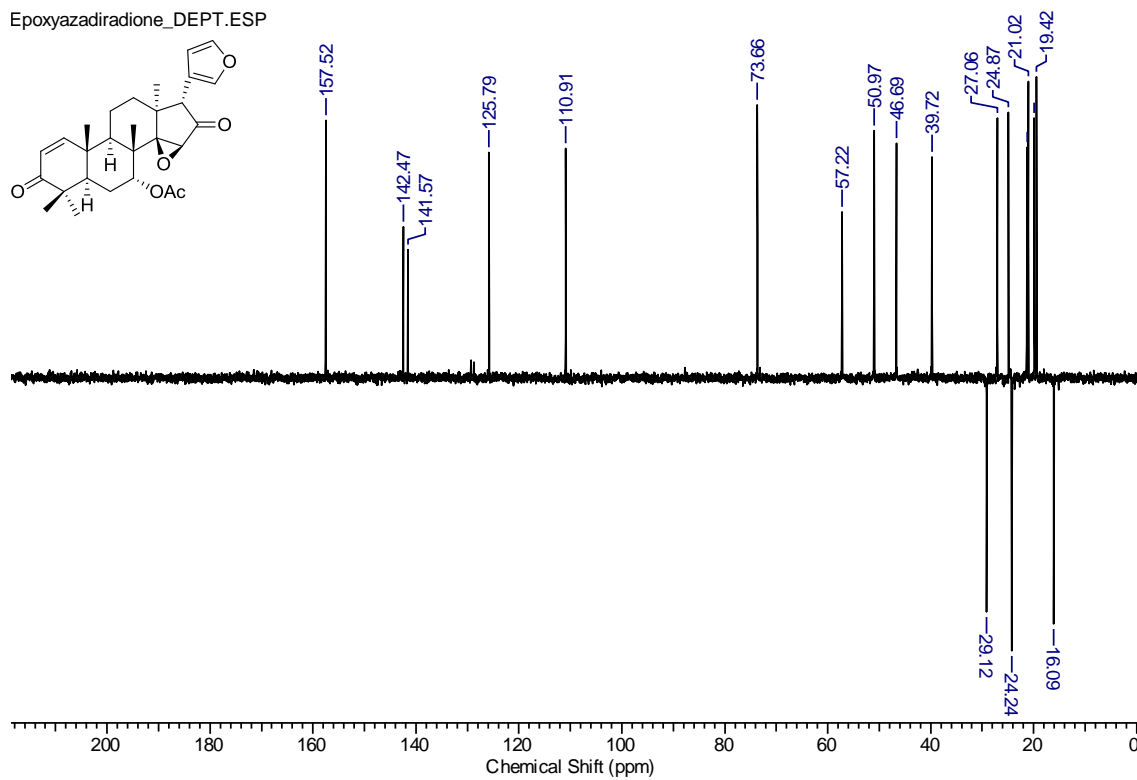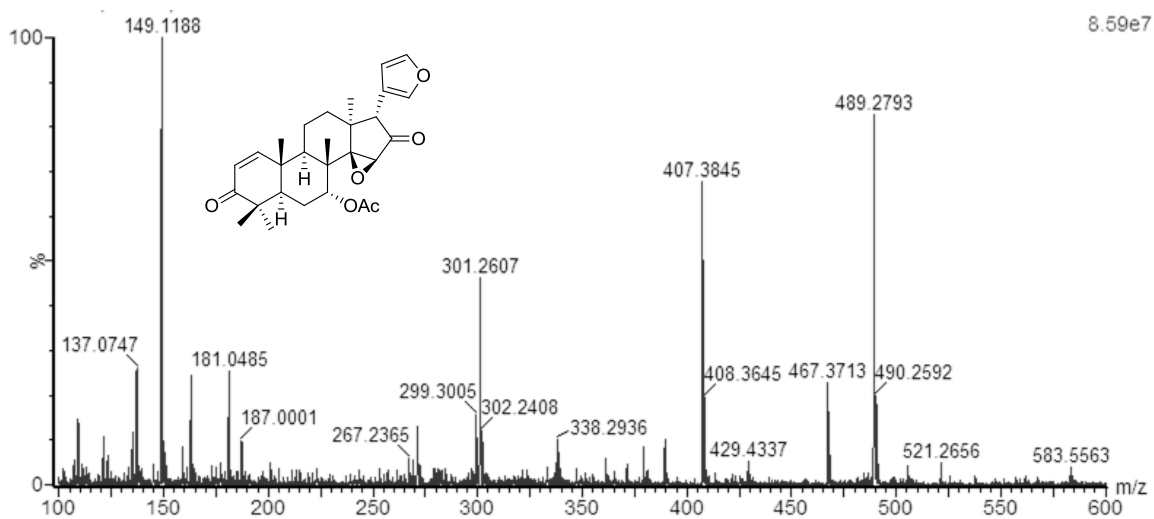

## 12 $\beta$ -Hydroxyepoxyazadiradione (**11**)

12 $\beta$ -Hydroxyepoxyazadiradione\_1H.ESP

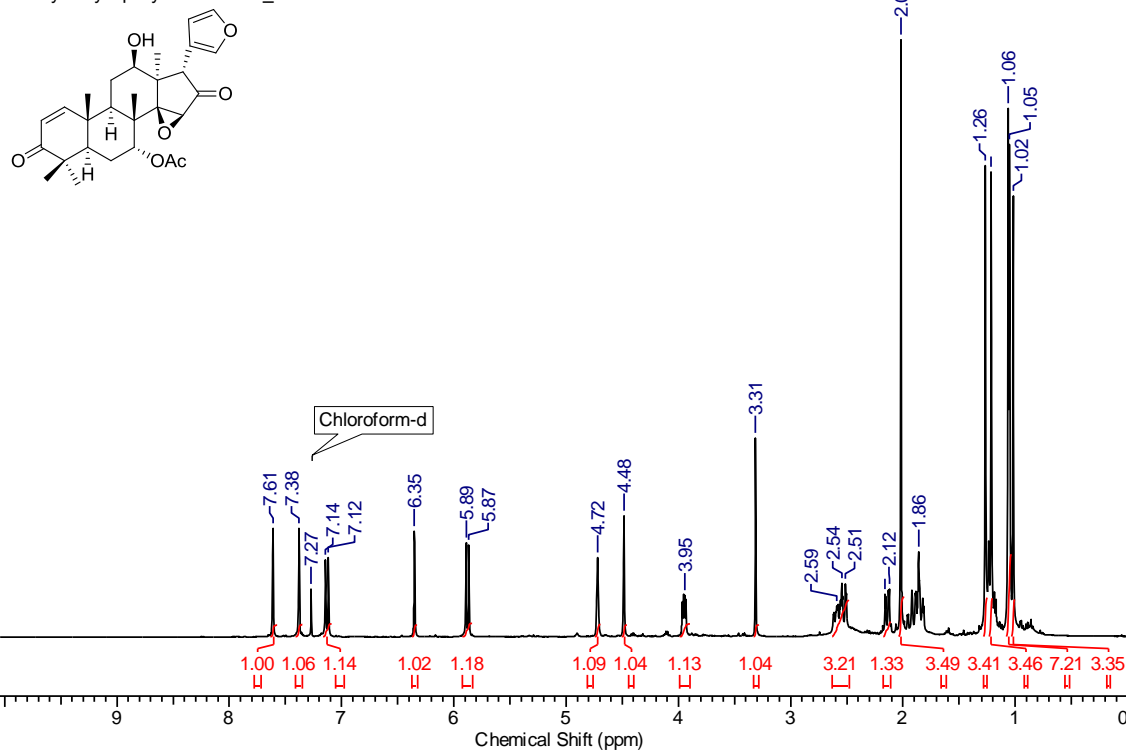

12 $\beta$ -Hydroxyepoxyazadiradione\_13C.ESP

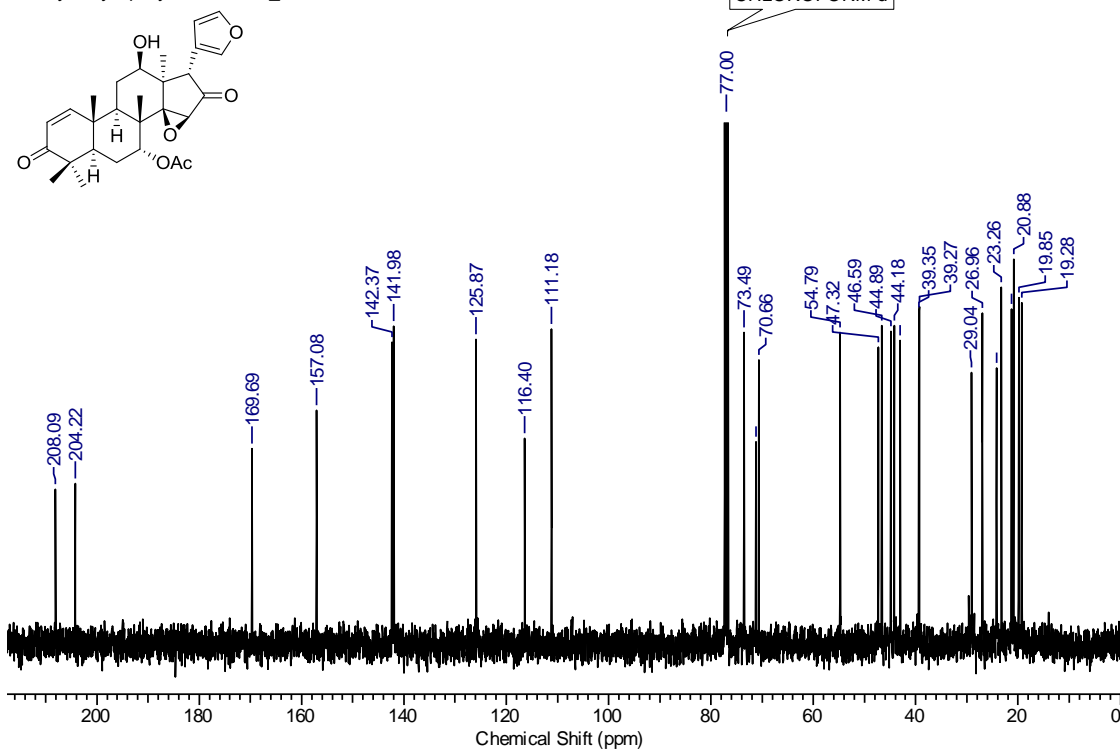

12 $\beta$ -Hydroxyaepoxyazadiradione\_DEPT.ESP

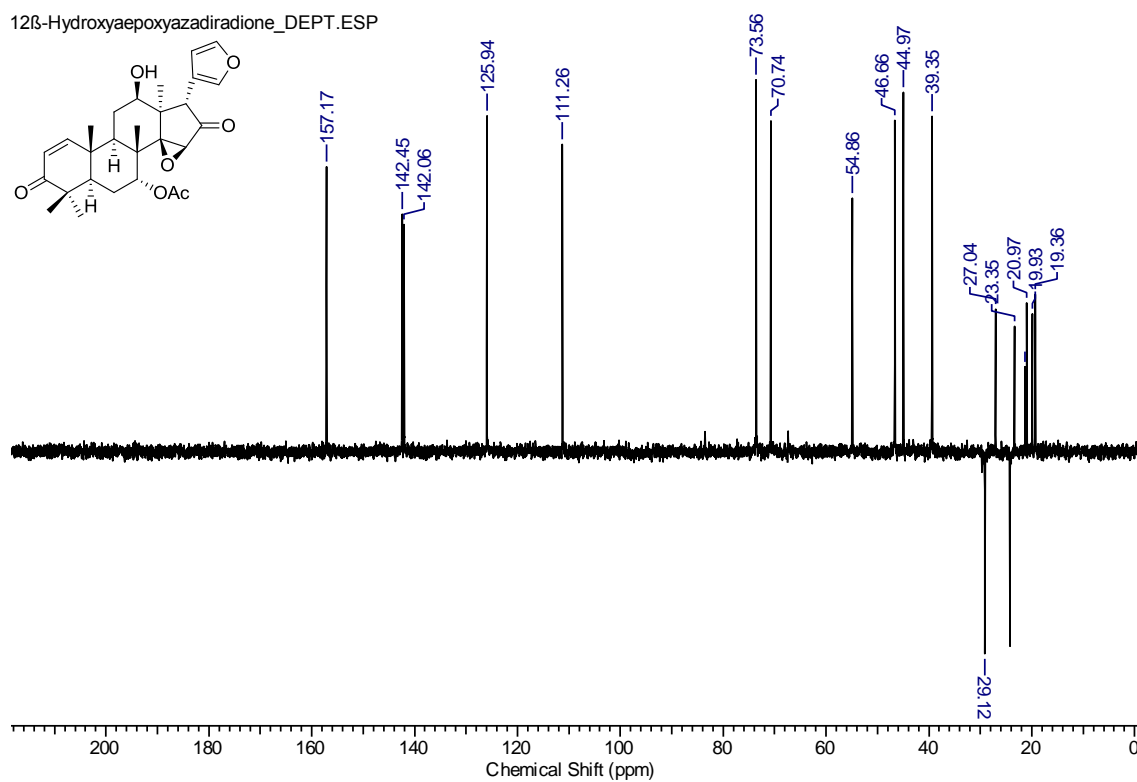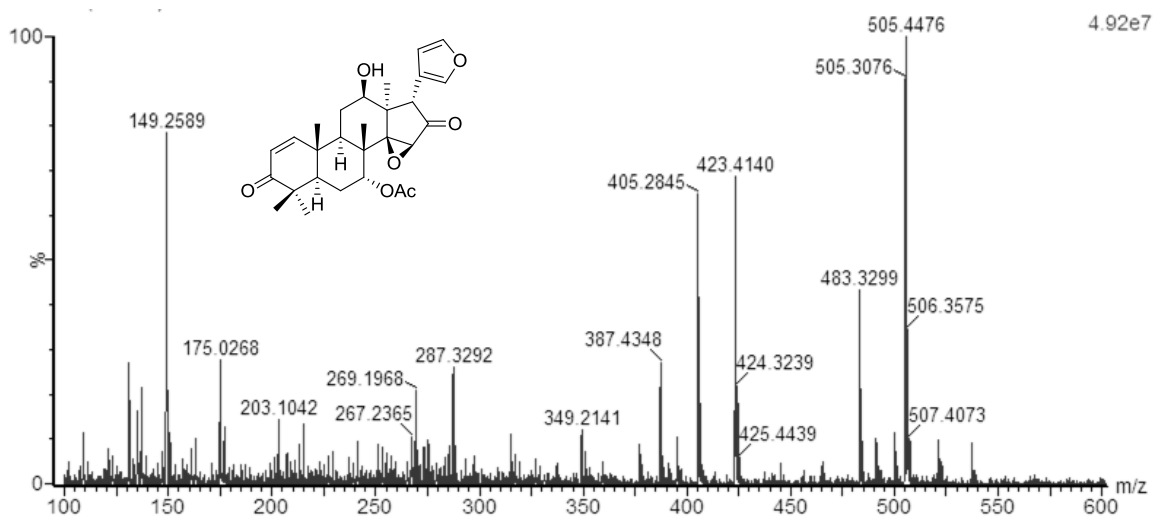

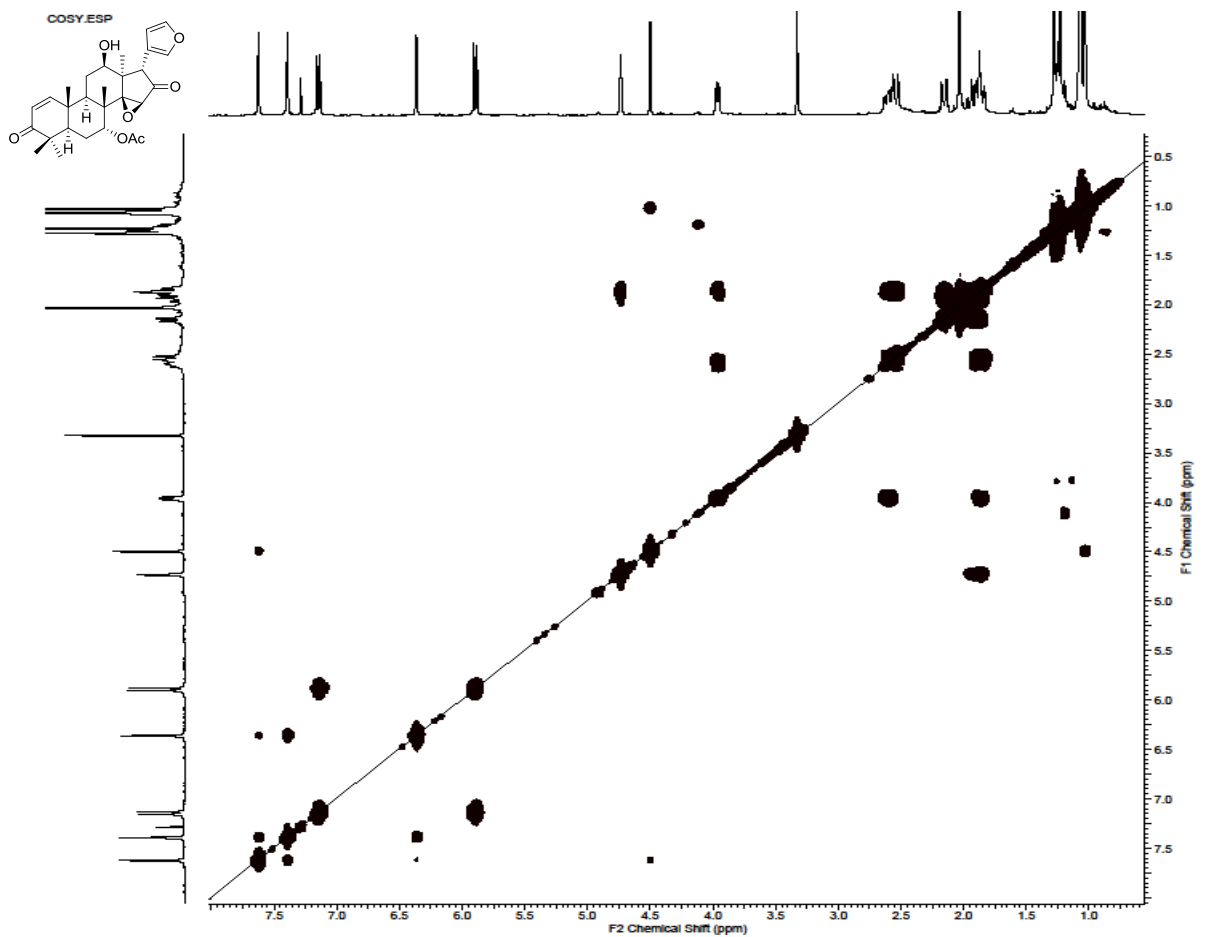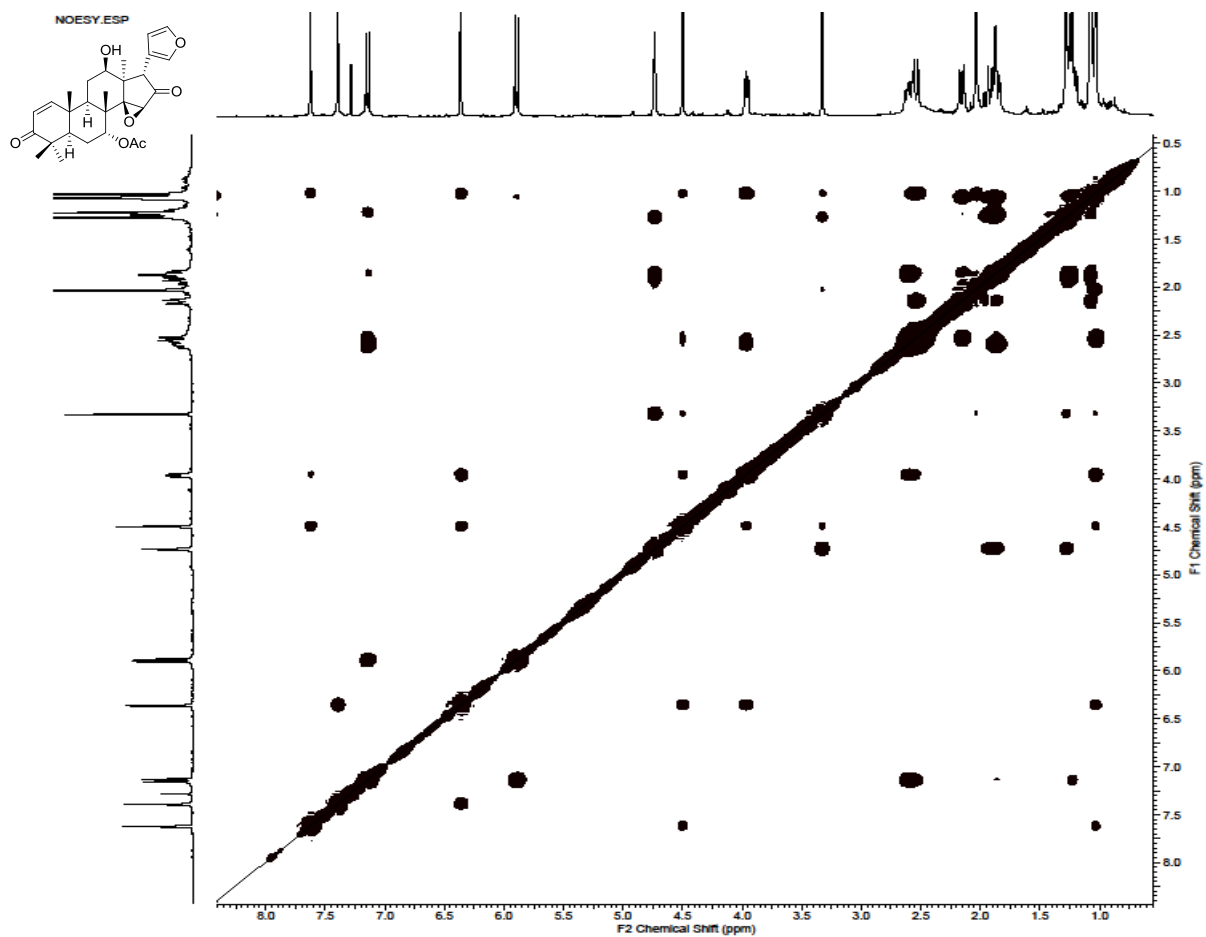

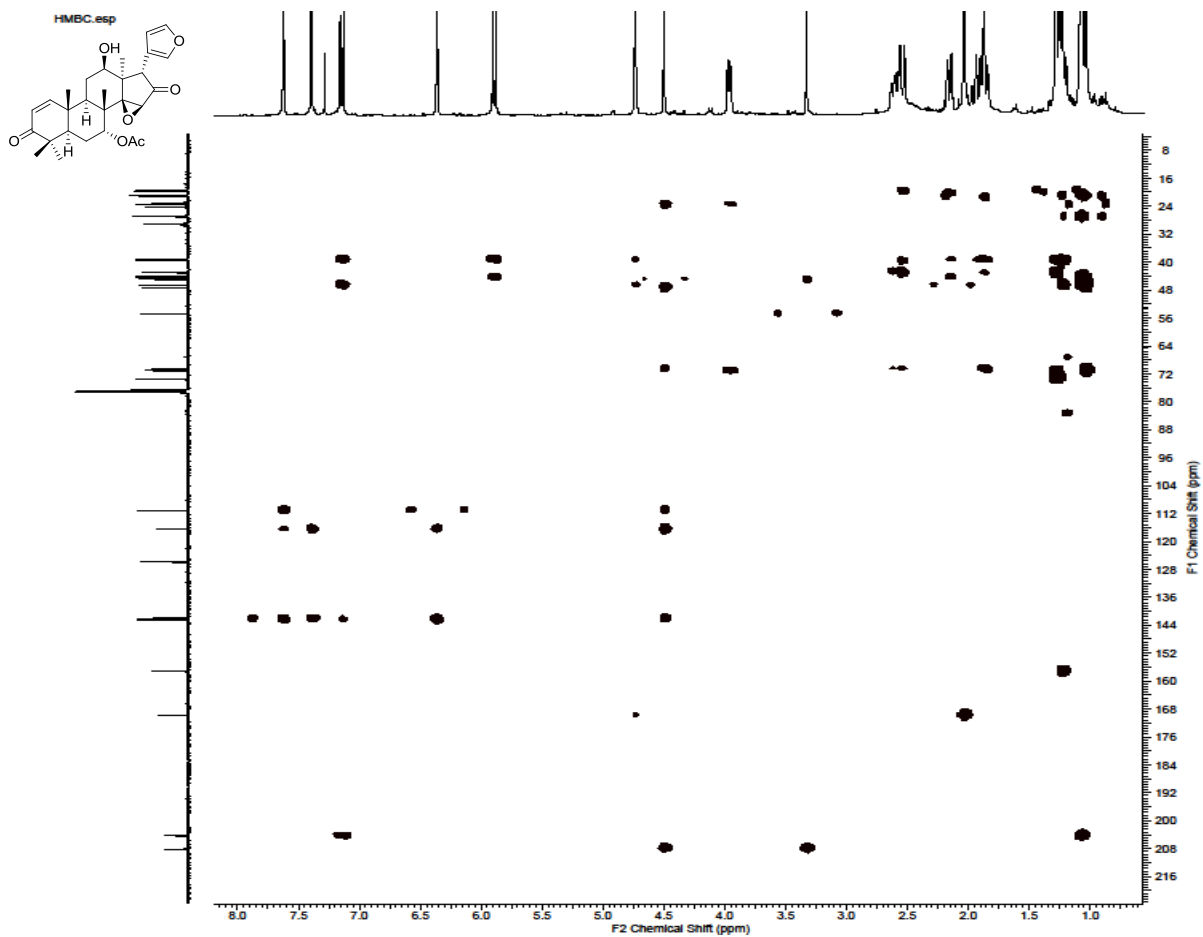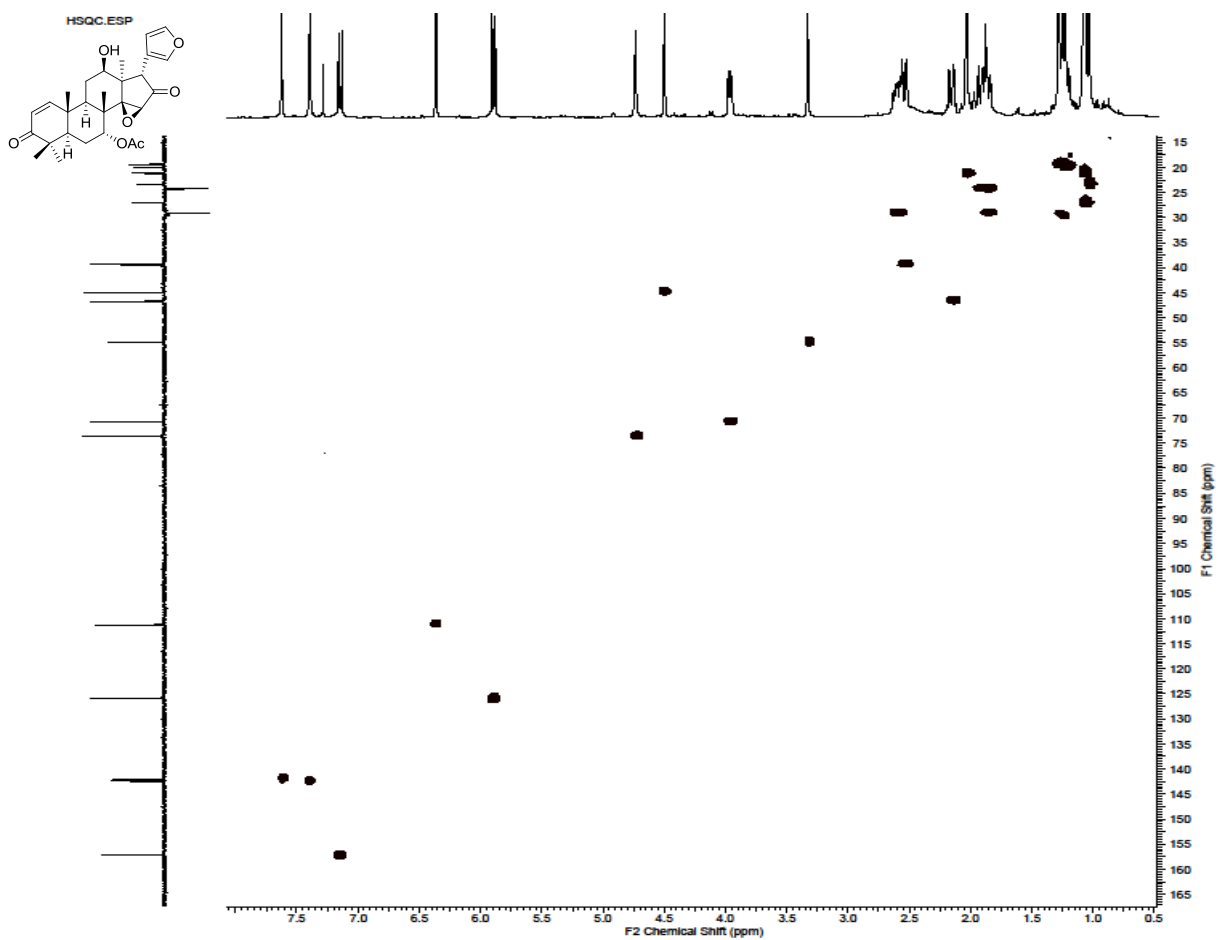



## 1,2-Dihydroepoxyazadiradione (12)

1,2-Dihydroepoxyazadiradione\_1H.ESP

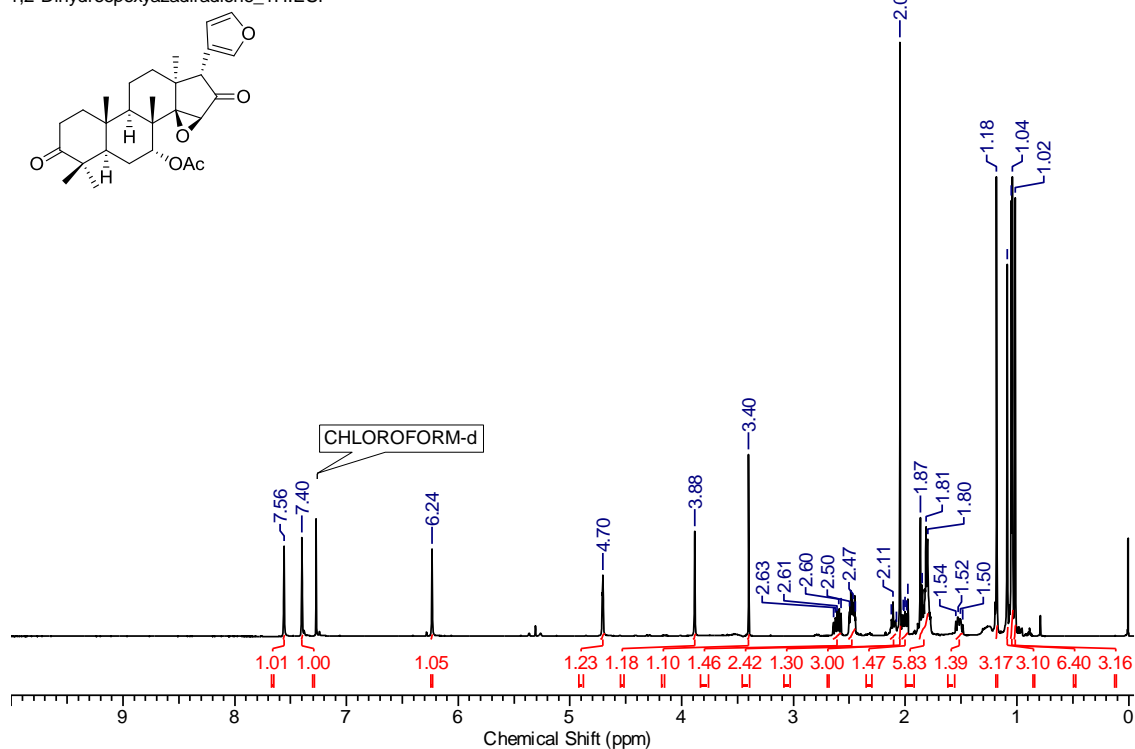

1,2-Dihydroepoxyazadiradione\_13C.ESP

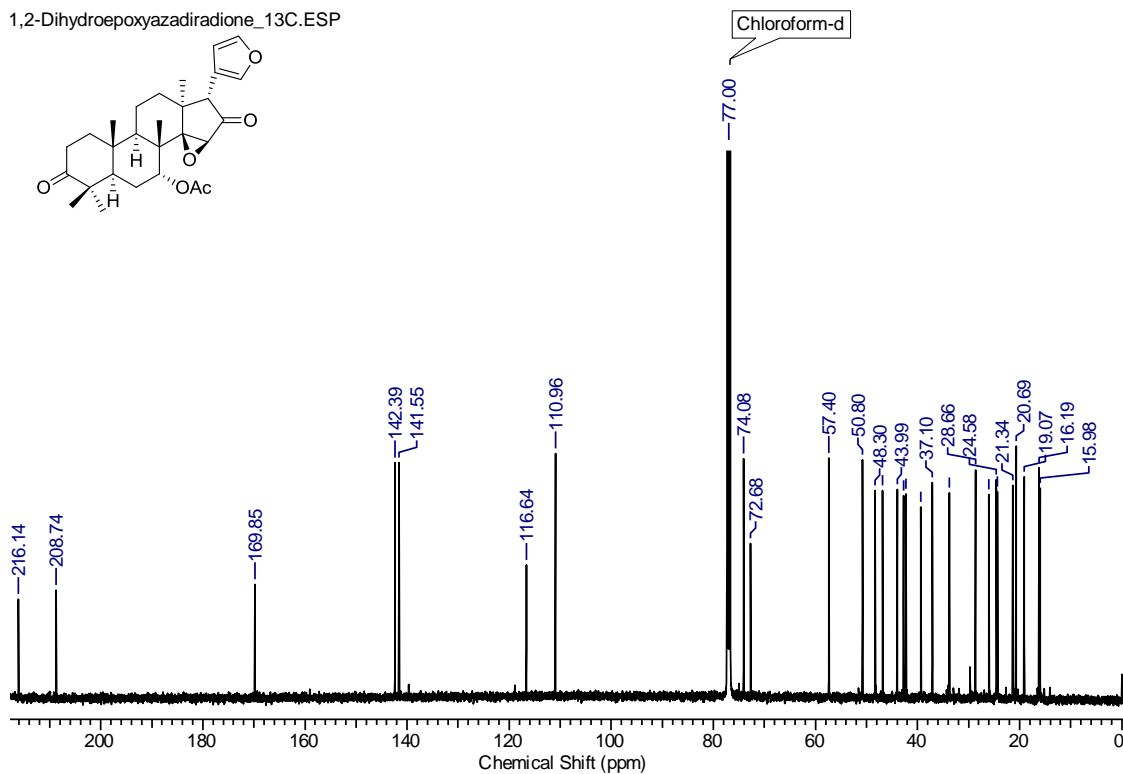

1,2-Dihydroepoxyazadiradione\_DEPT.ESP

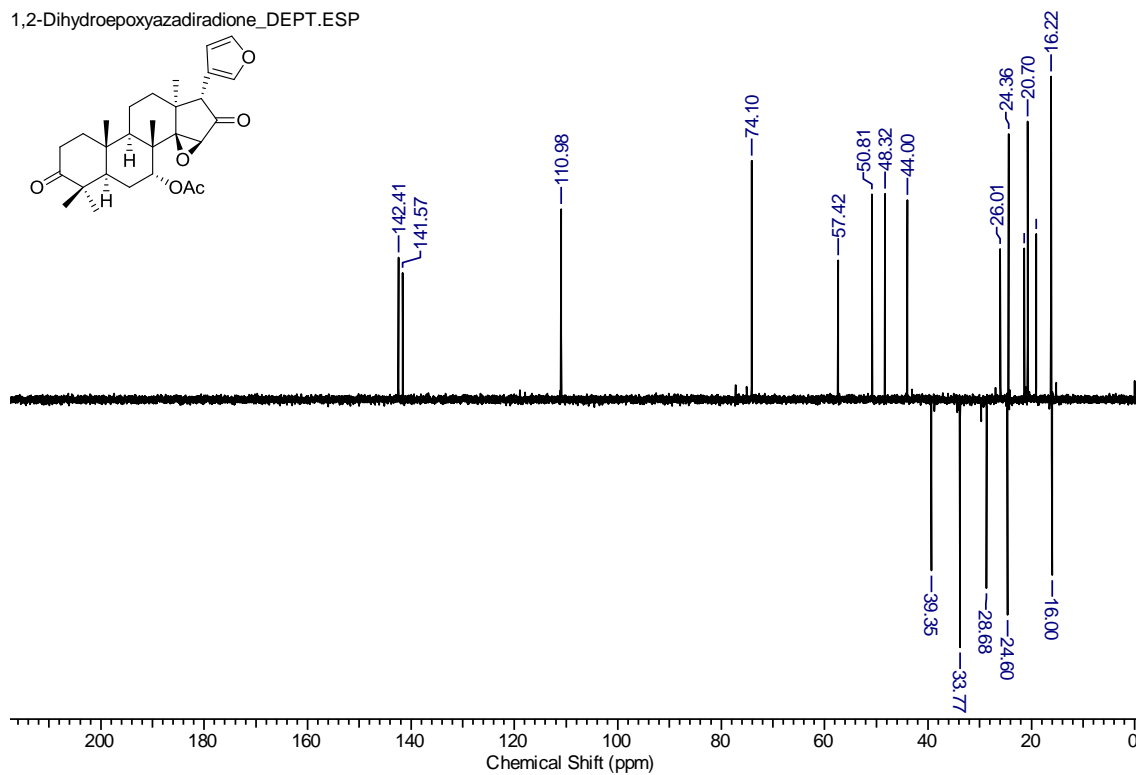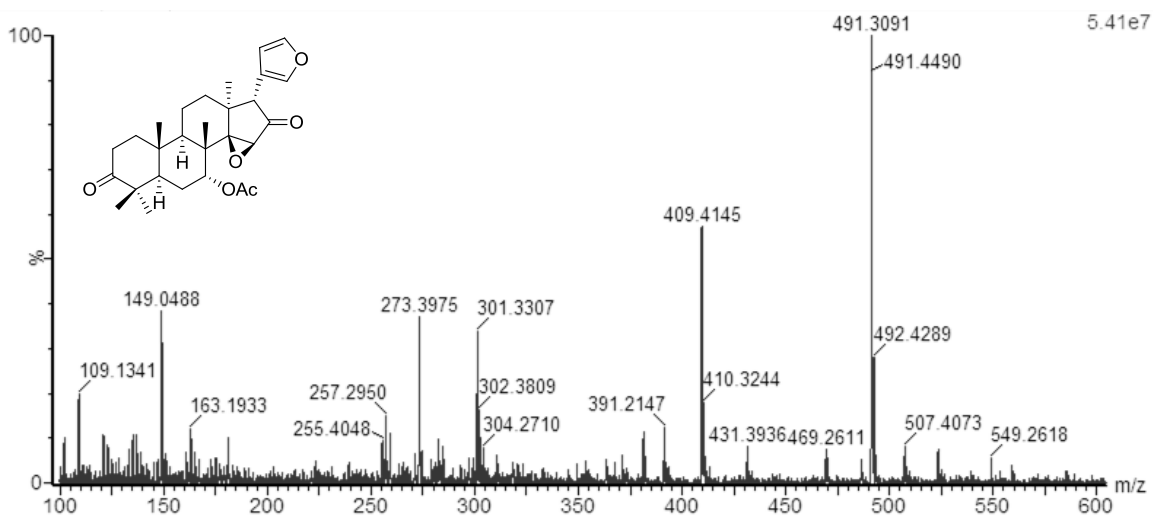

## 12 $\beta$ -Hydroxy-1,2-Dihydroepoxyazadiradione (**13**)

12 $\beta$ -Hydroxy-1,2-Dihydroepoxyazadiradione\_1H.ESP

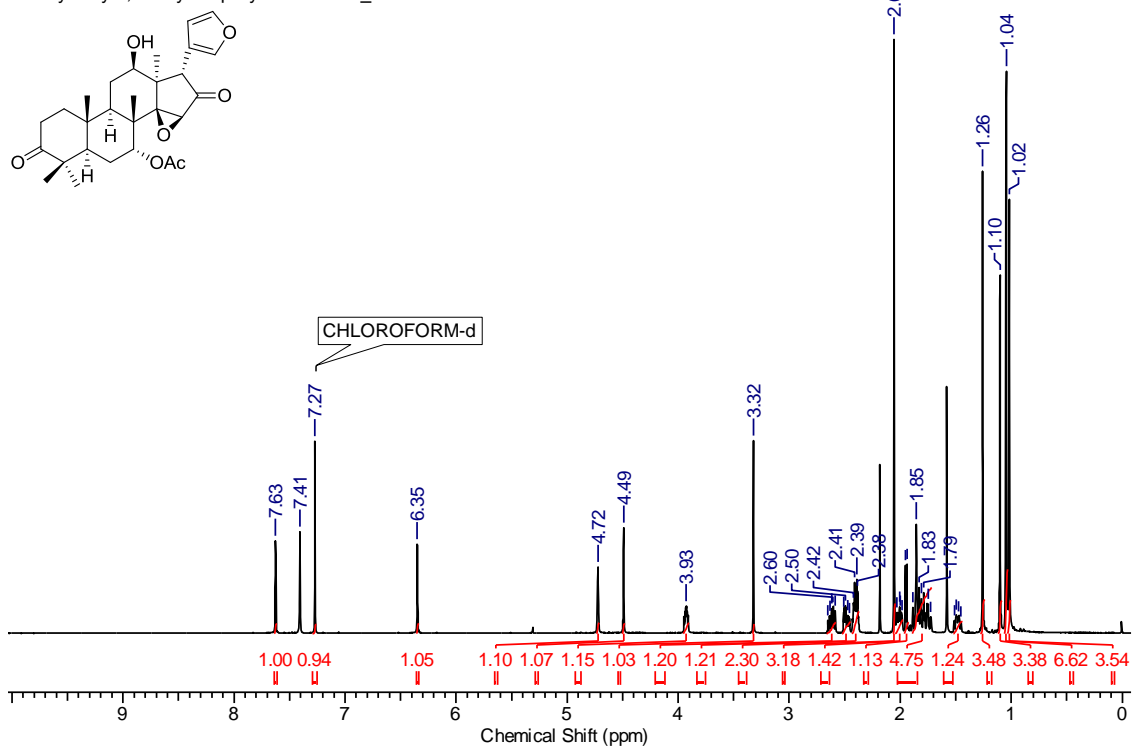

12 $\beta$ -Hydroxy-1,2-Dihydroepoxyazadiradione\_13C.ESP

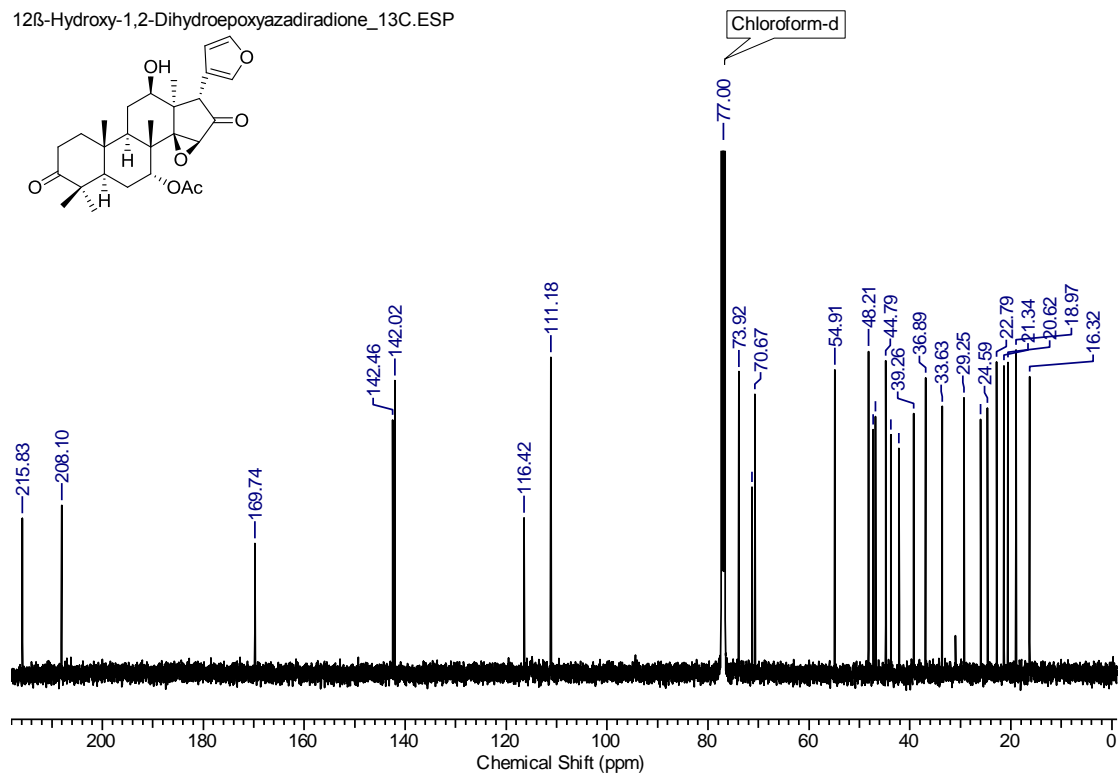

12 $\beta$ -Hydroxy-1,2-Dihydroepoxyazadiradione\_DEPT.ESP

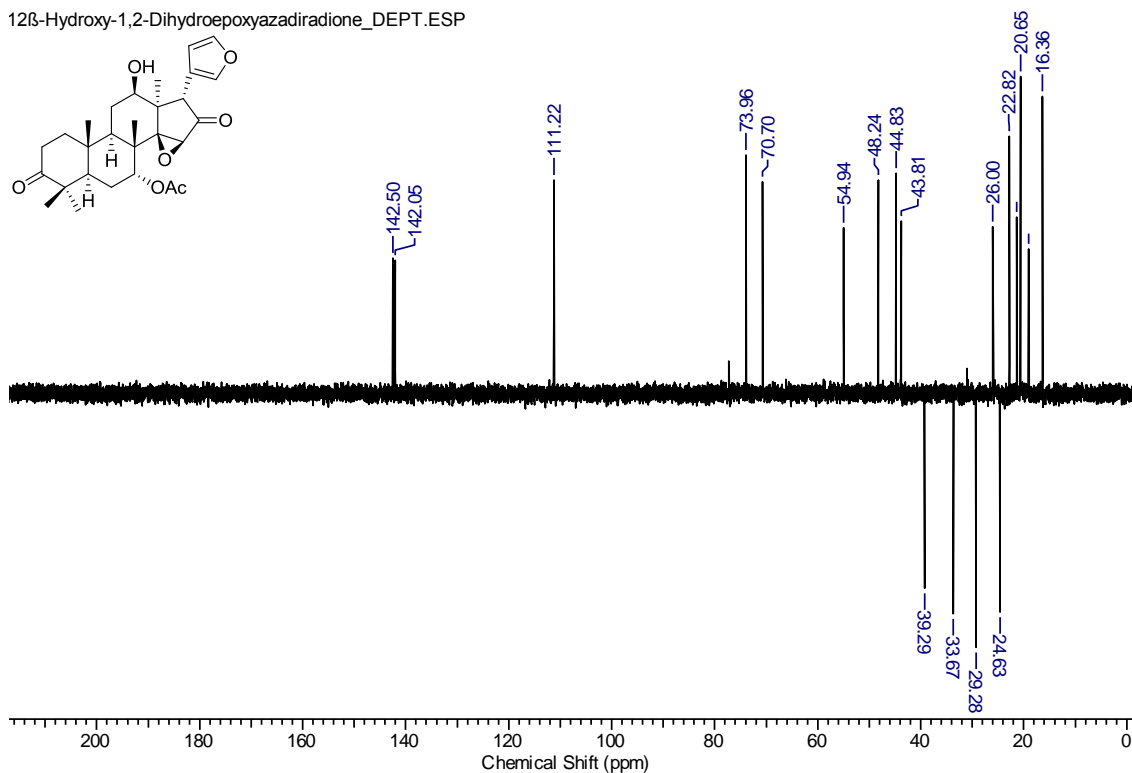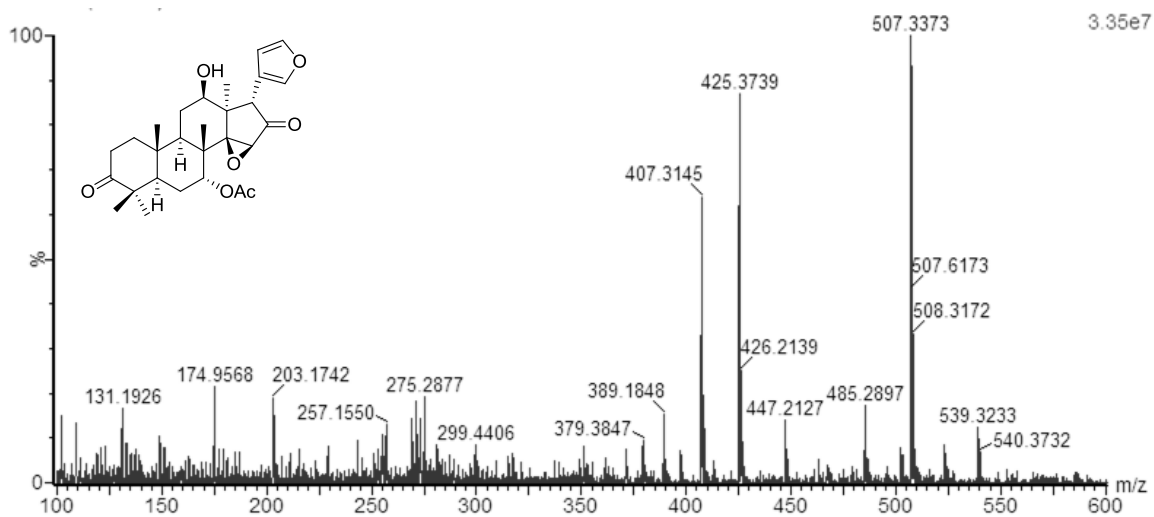

## Nimbocinol (14)

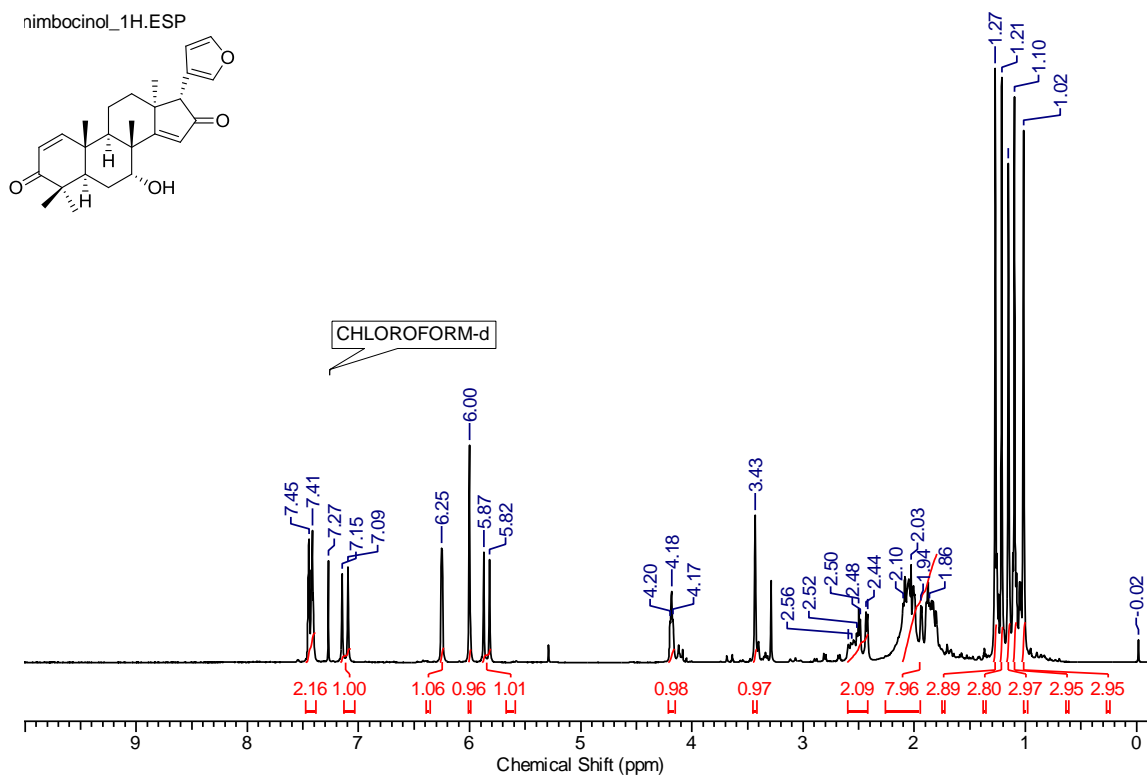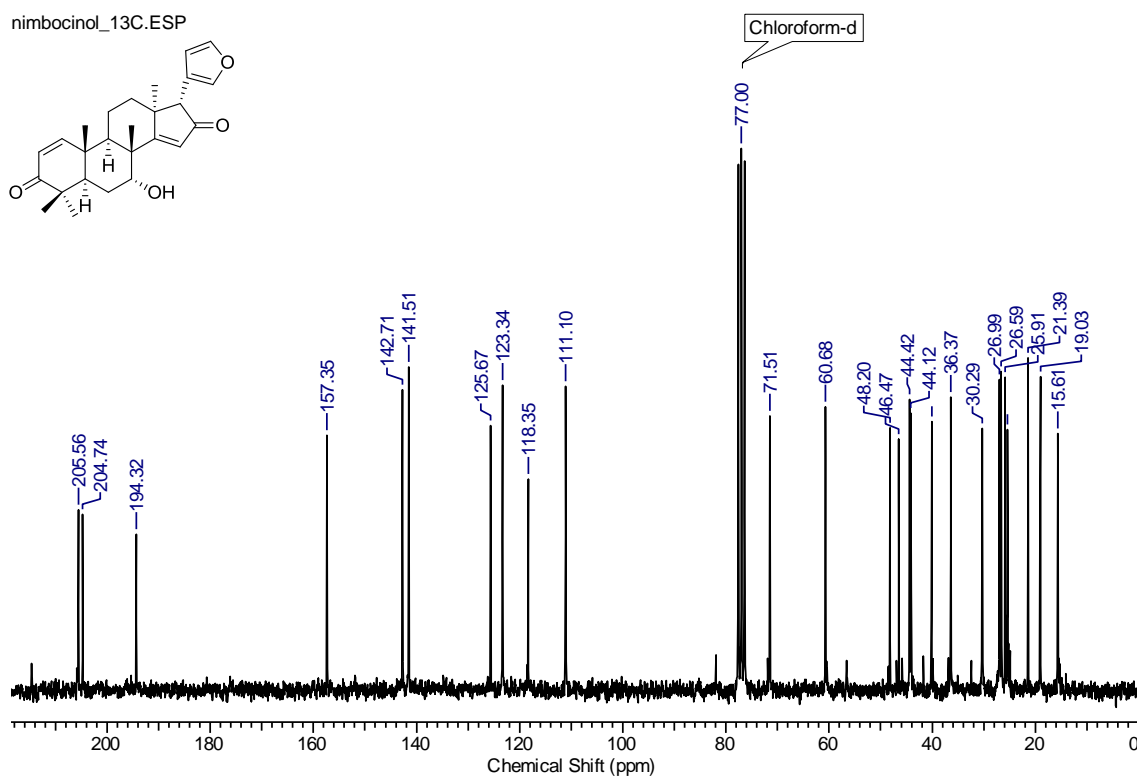

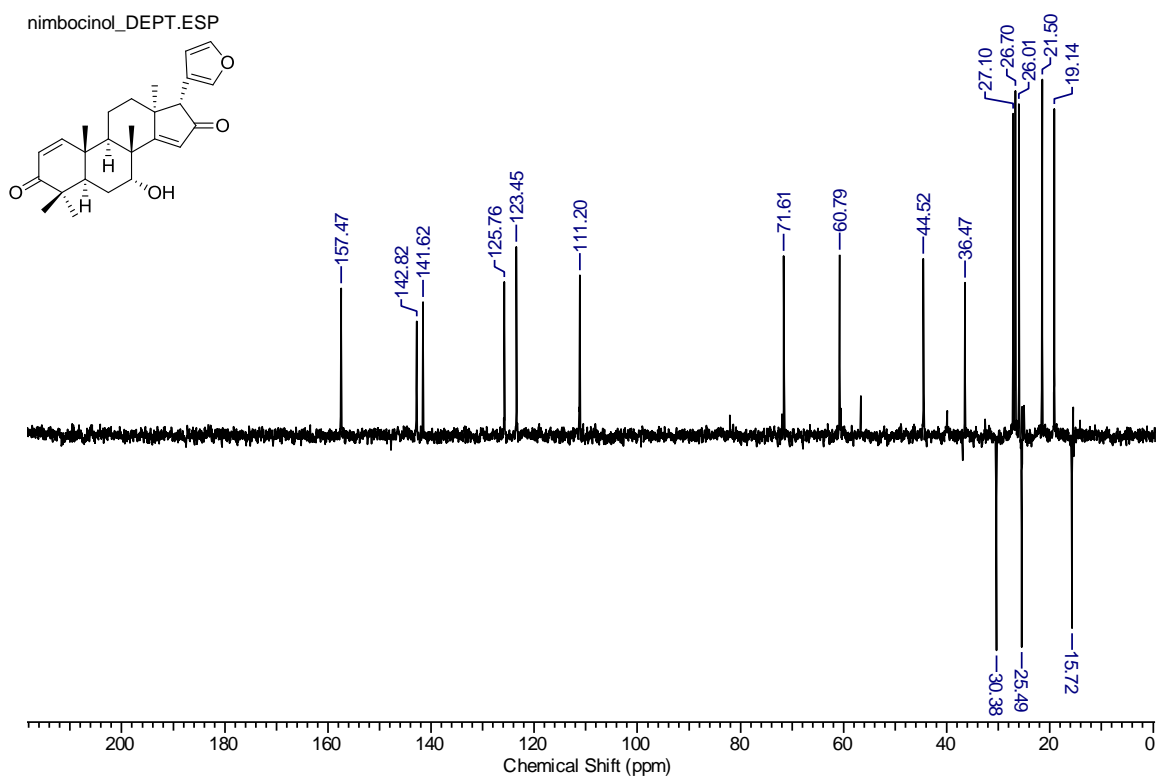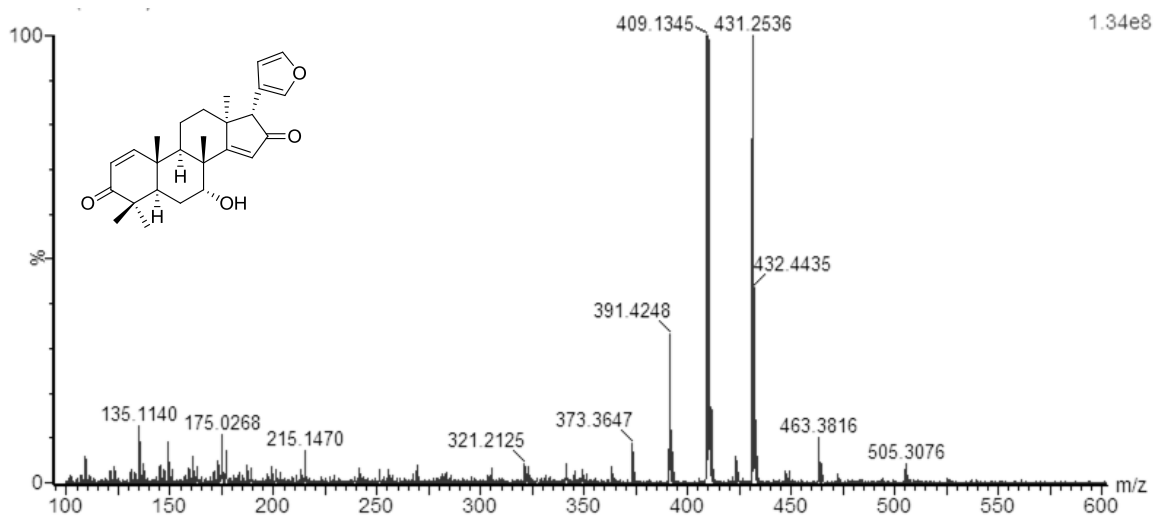

## 17 $\beta$ -Hydroxynimbocinol (15)

17 $\beta$ -Hydroxynimbocinol\_1H.ESP

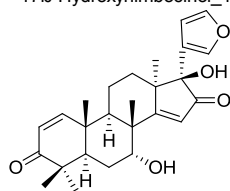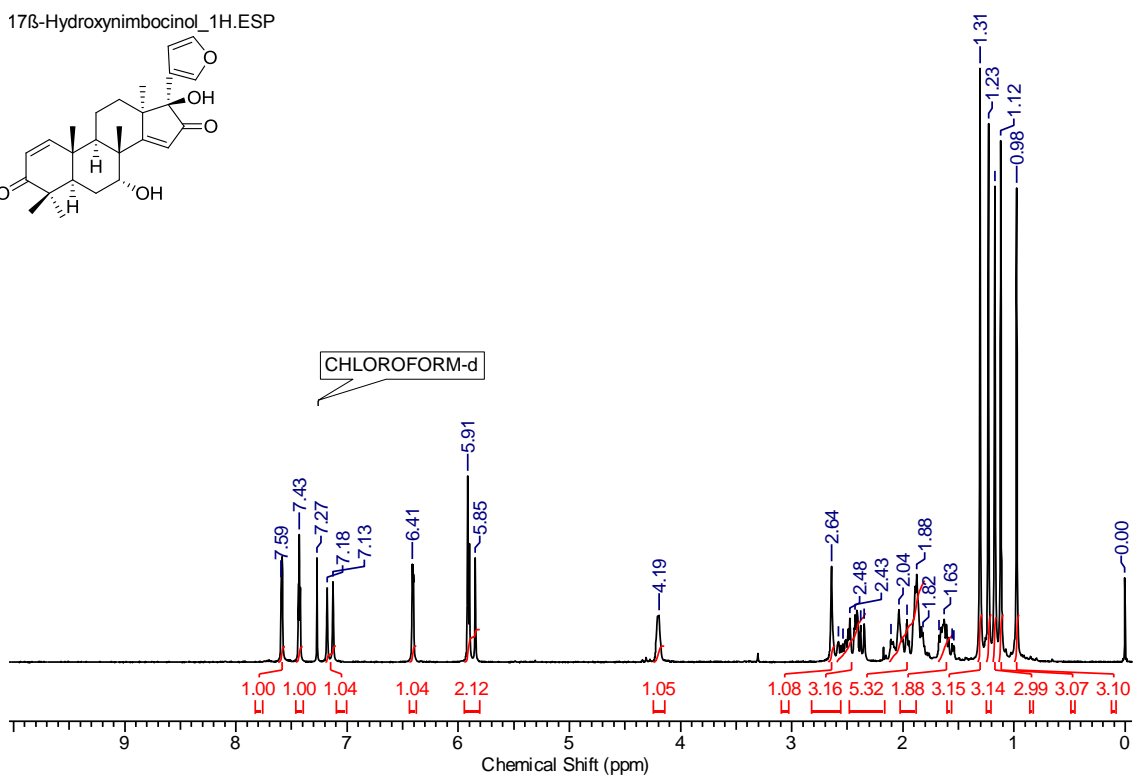

17 $\beta$ -Hydroxynimbocinol\_13C.ESP

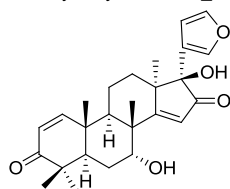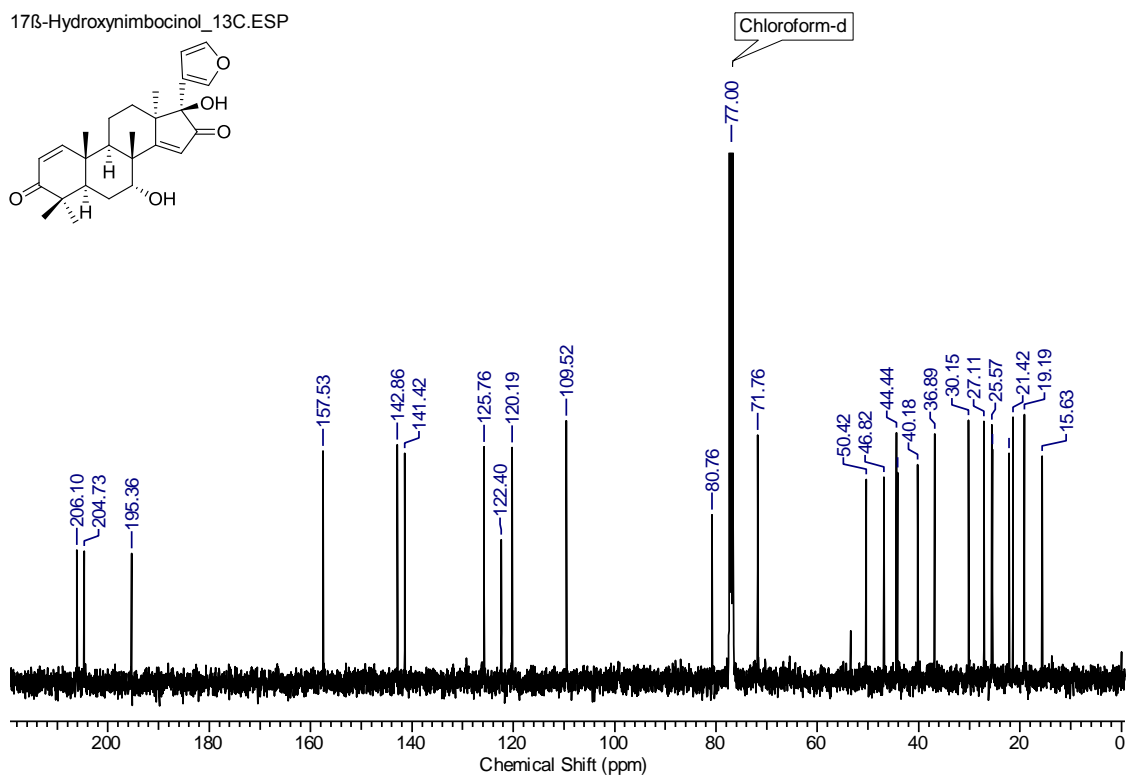

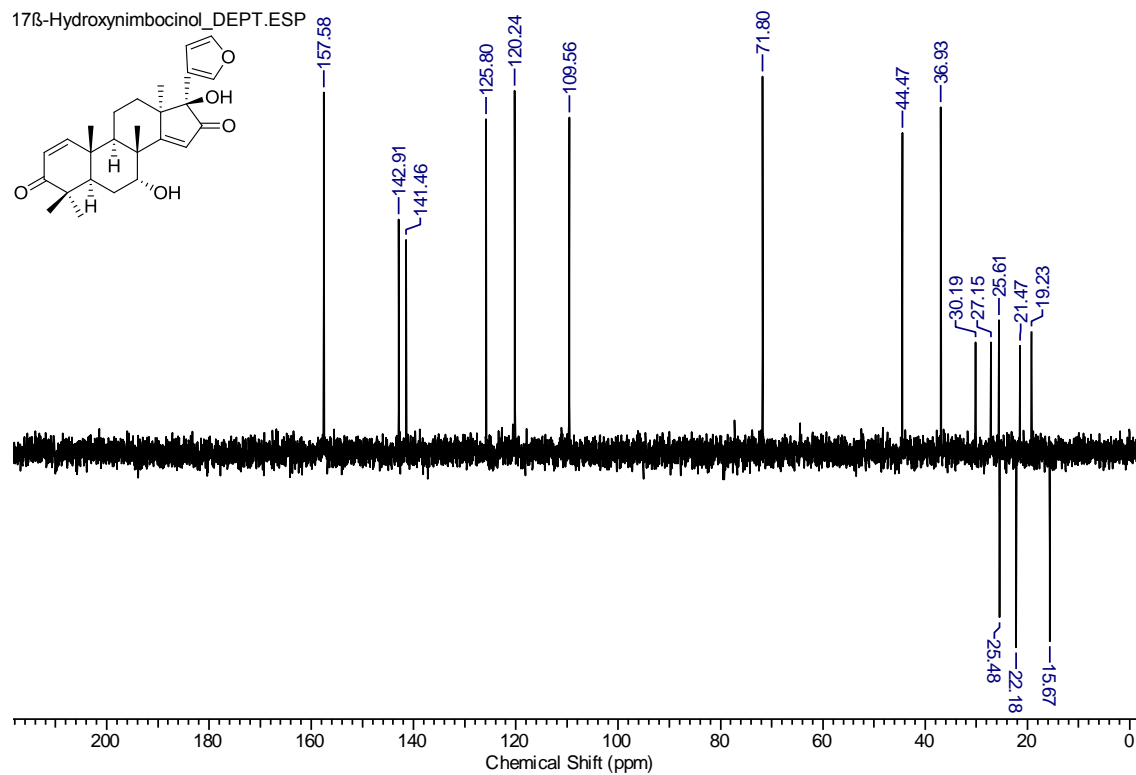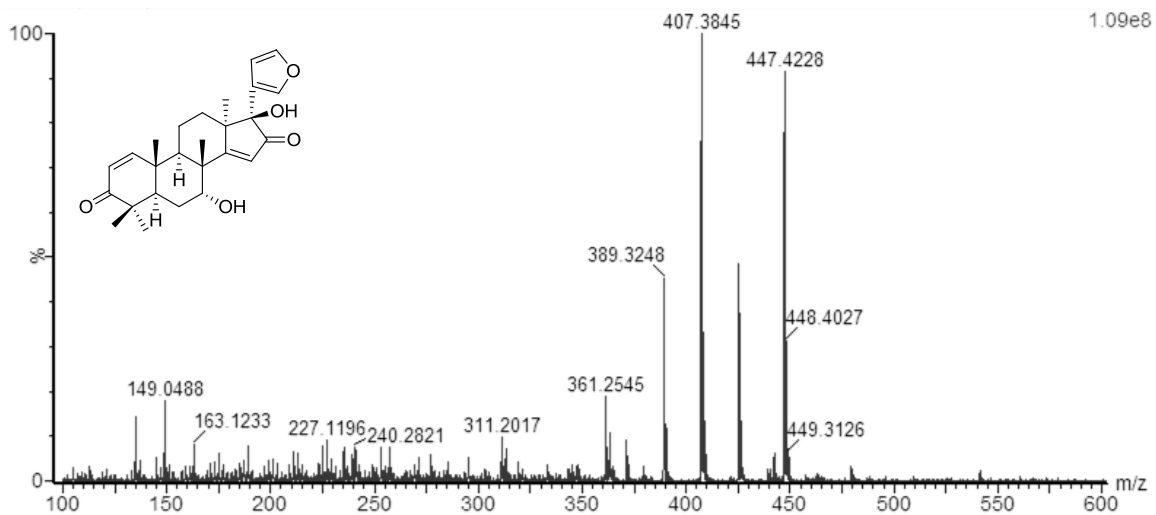



## 17 $\beta$ -Hydroxy-7-oxonimbocinol (16)

17 $\beta$ -Hydroxy-7-oxonimbocinol\_1H.ESP

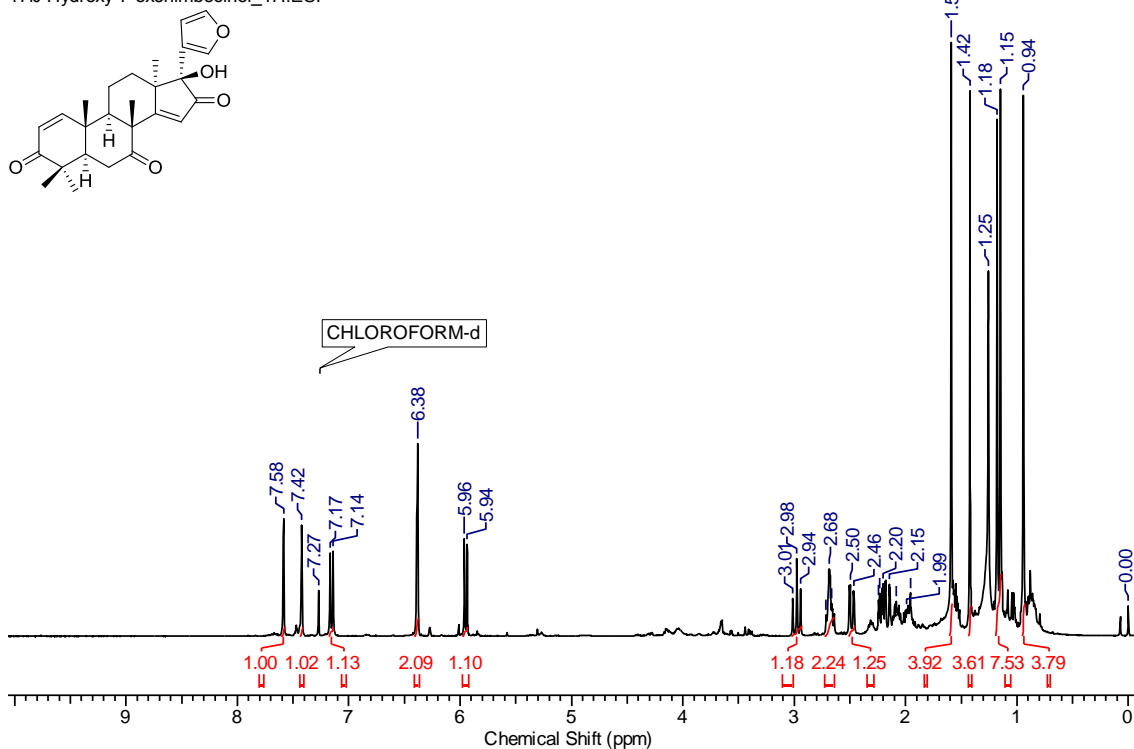

17 $\beta$ -Hydroxy-7-oxonimbocinol\_13C.ESP

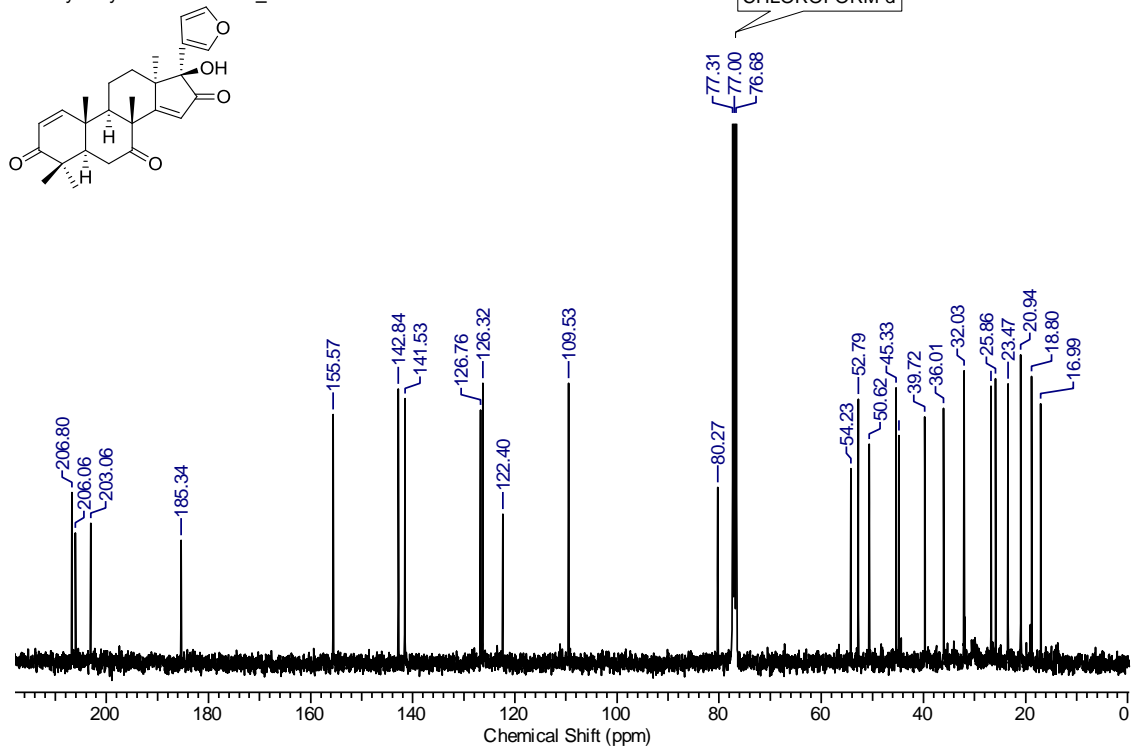

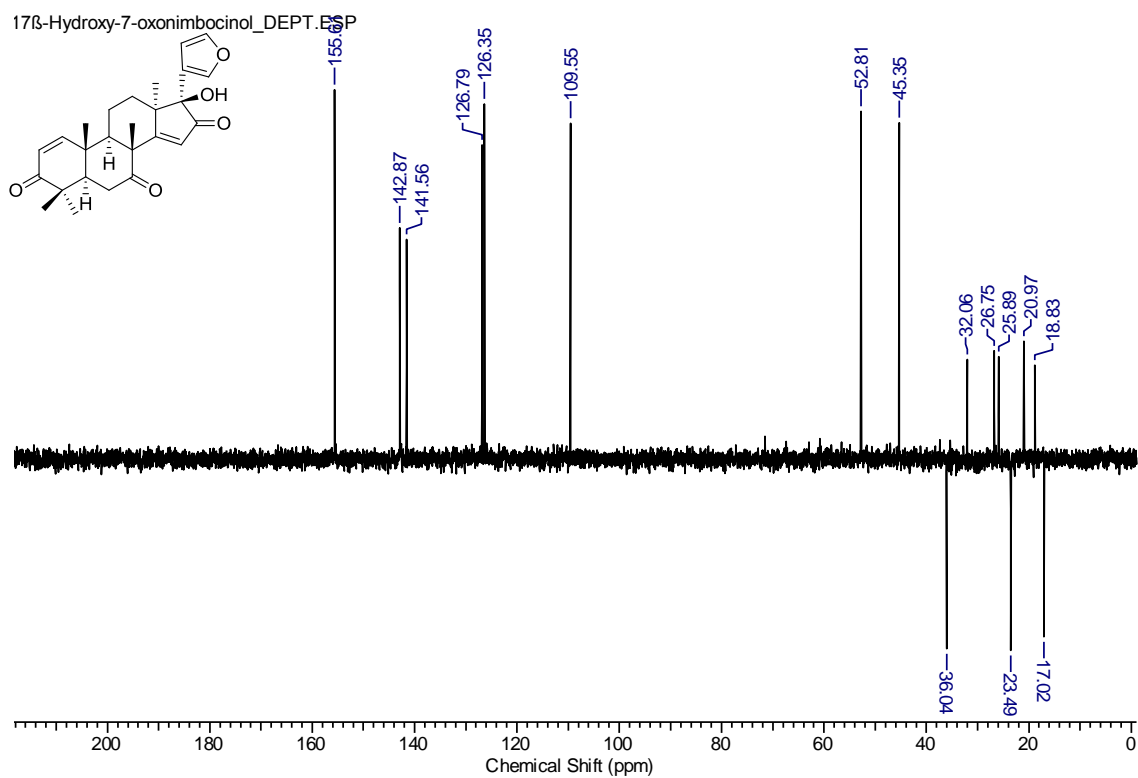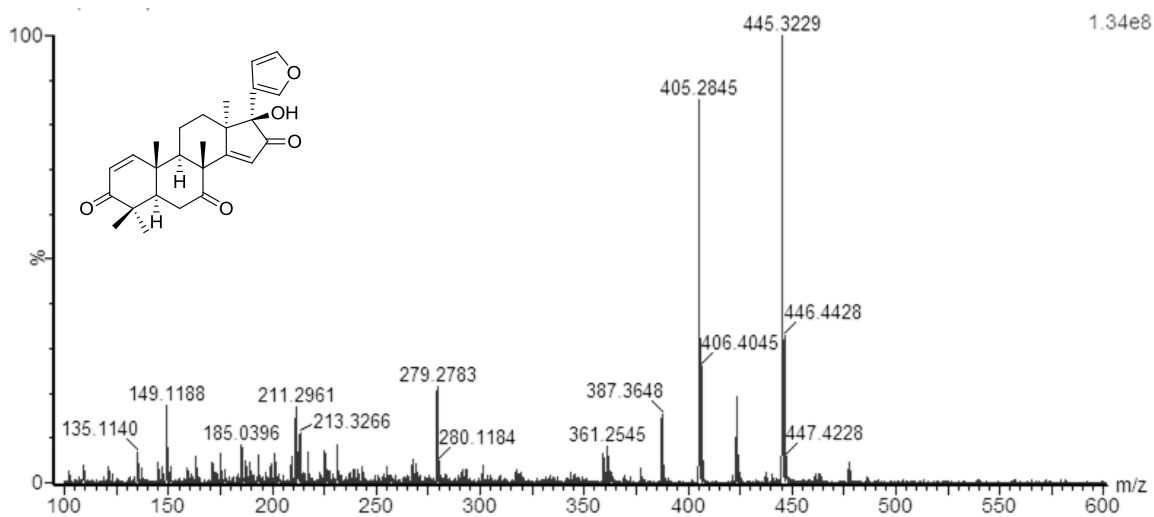

## 7-Deacetylepoxызadiradione (17)

DeOAc Epaz\_1H.ESP

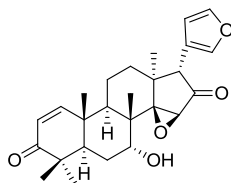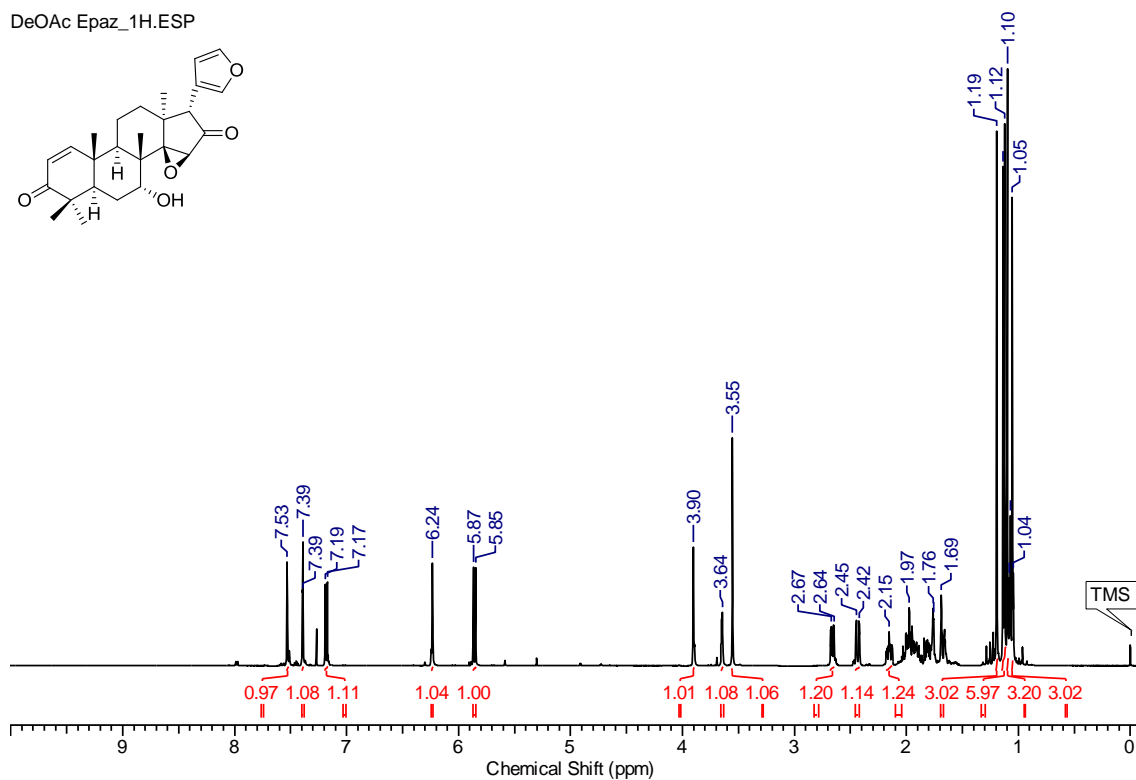

DeOAc Epaz\_13C.ESP

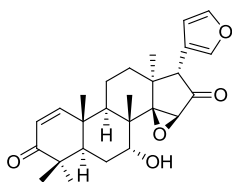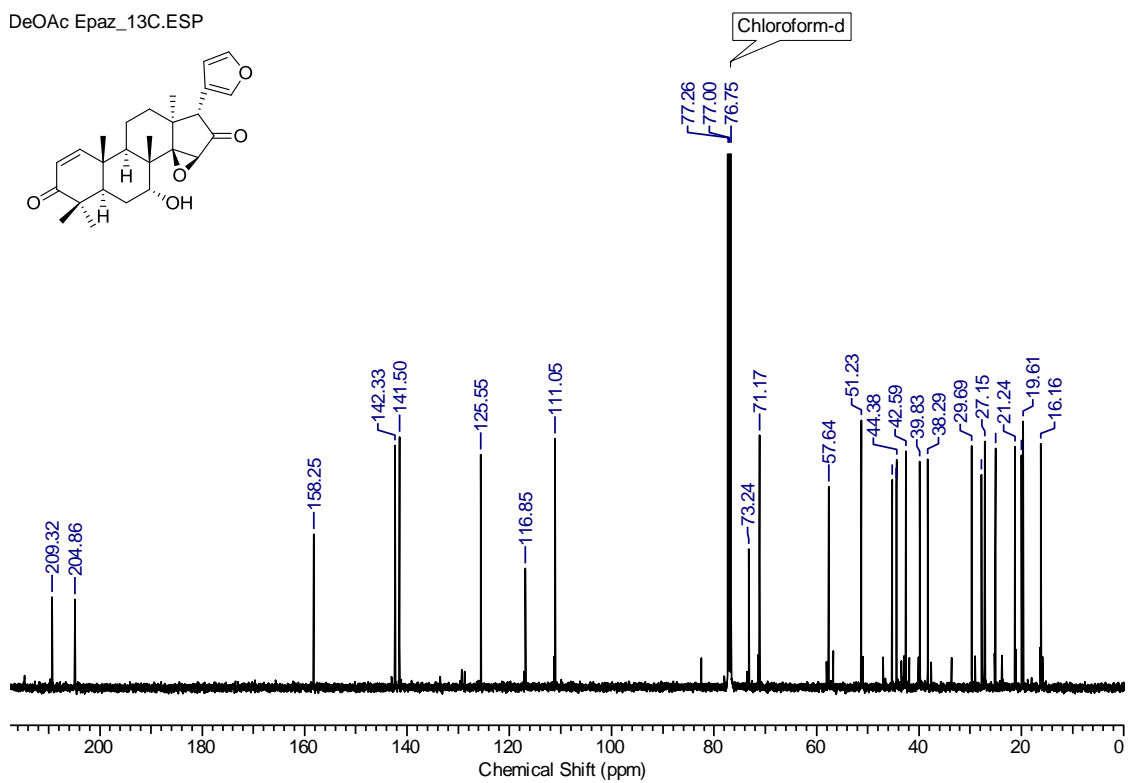

DeOAc Epaz\_DEPT.ESP

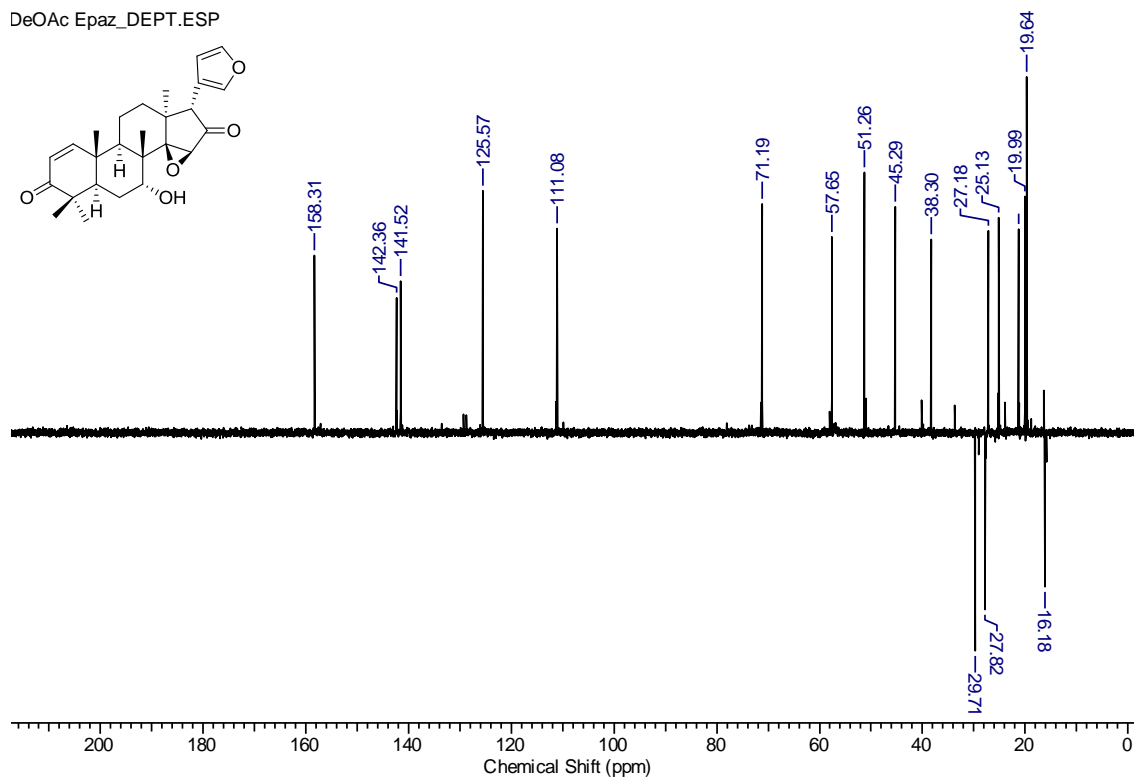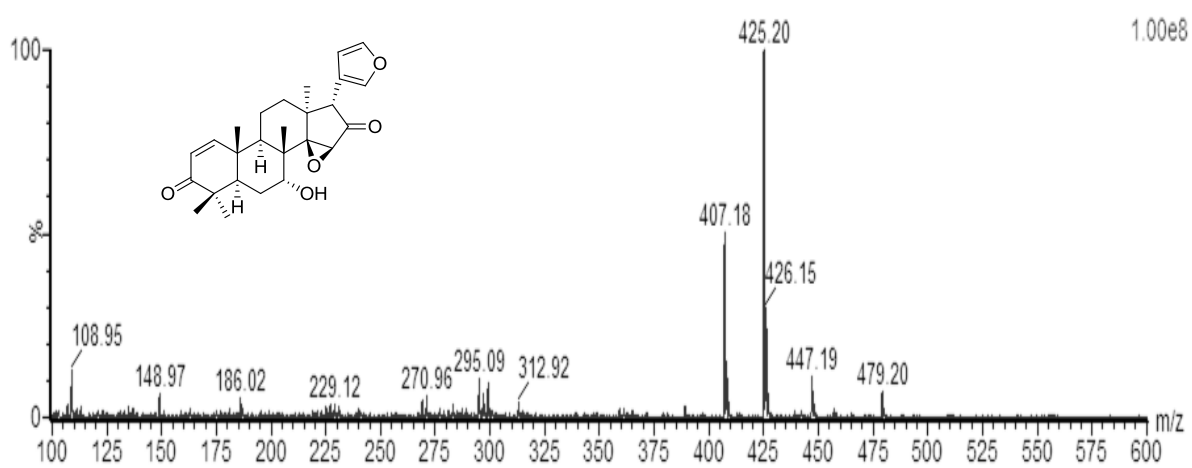

## 12 $\beta$ -Hydroxy-7-deacetylepoxyzadiradione (18)

12-OH DeOAc Epaz\_1H.ESP

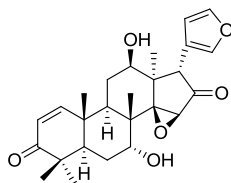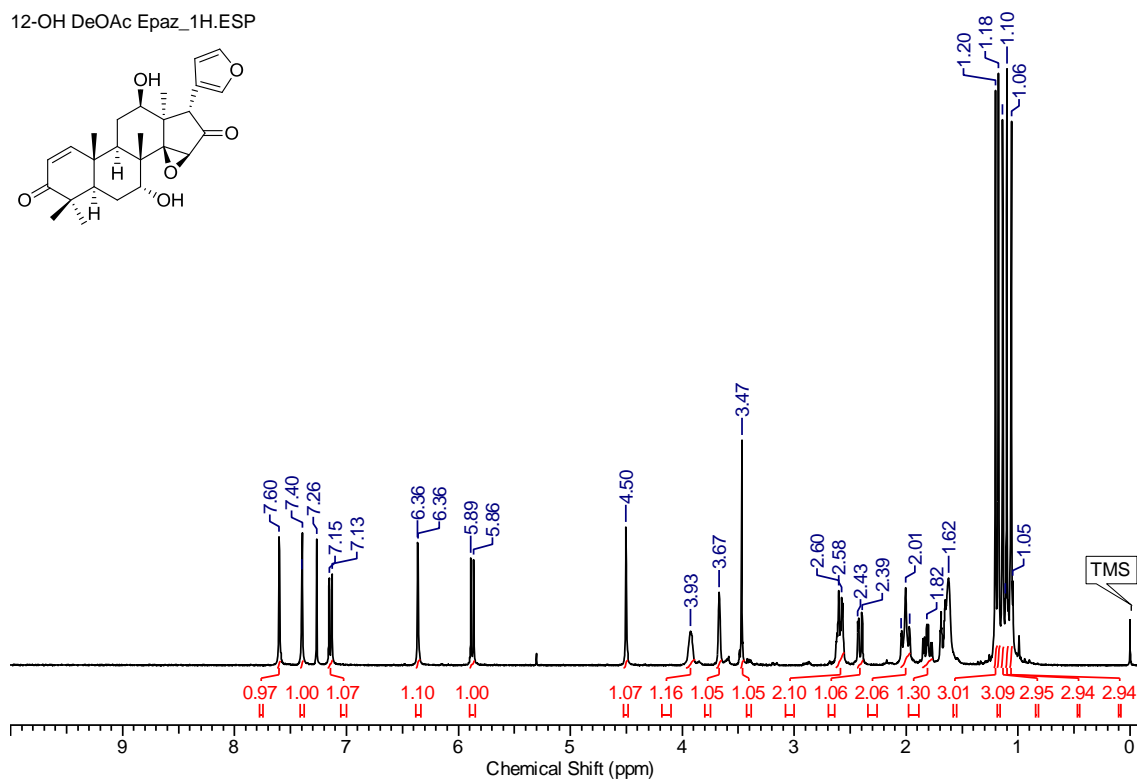

12-OH DeOAc Epaz\_13C.ESP

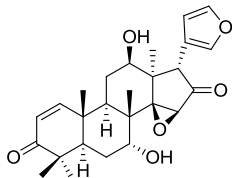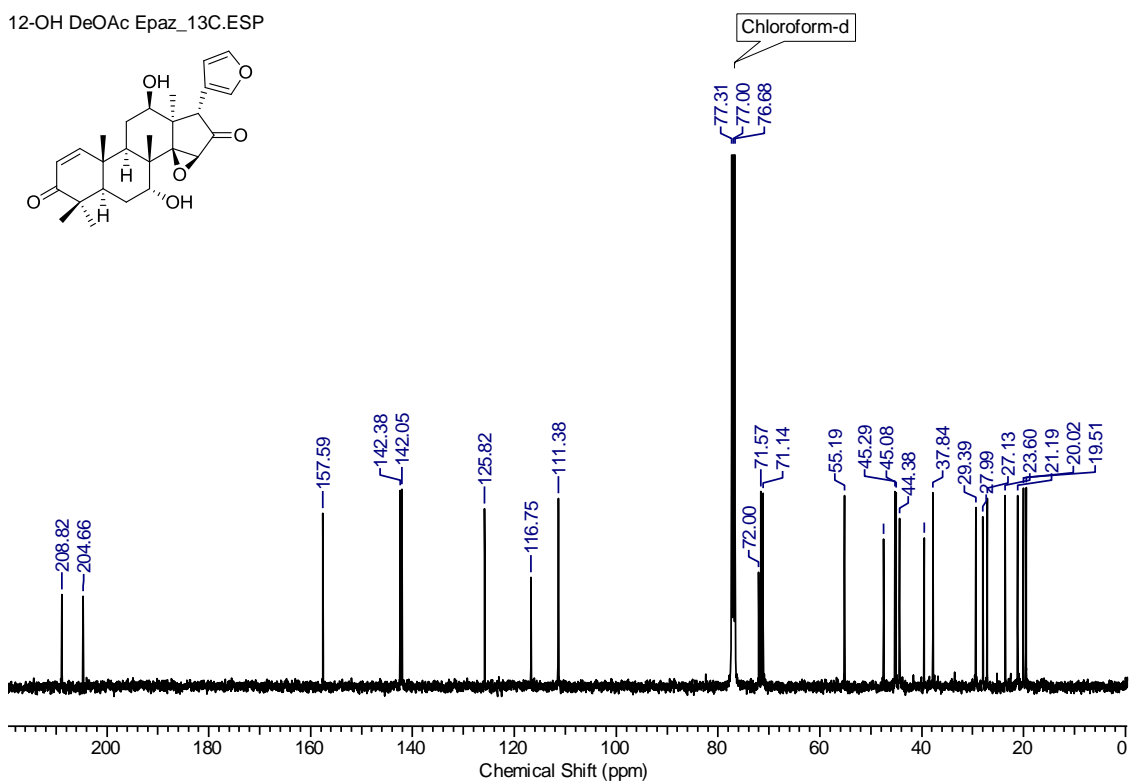

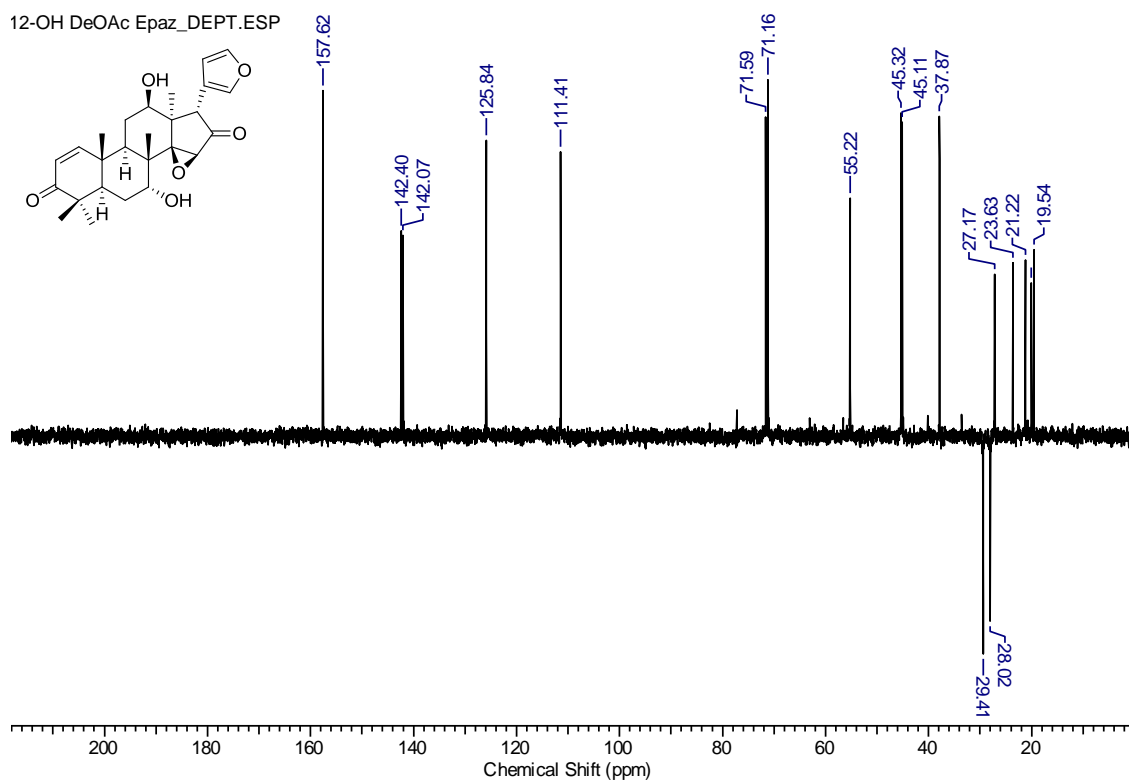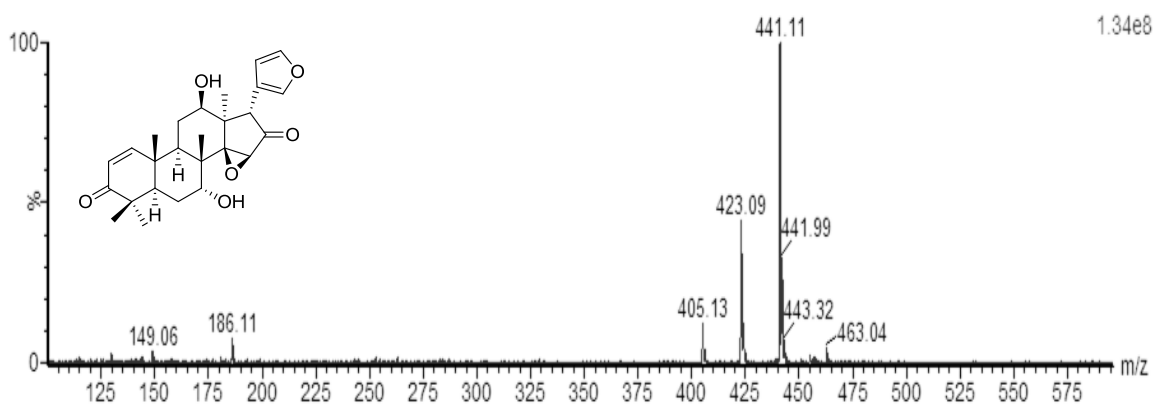

## Gedunin (19)

Gedunin\_1H.ESP

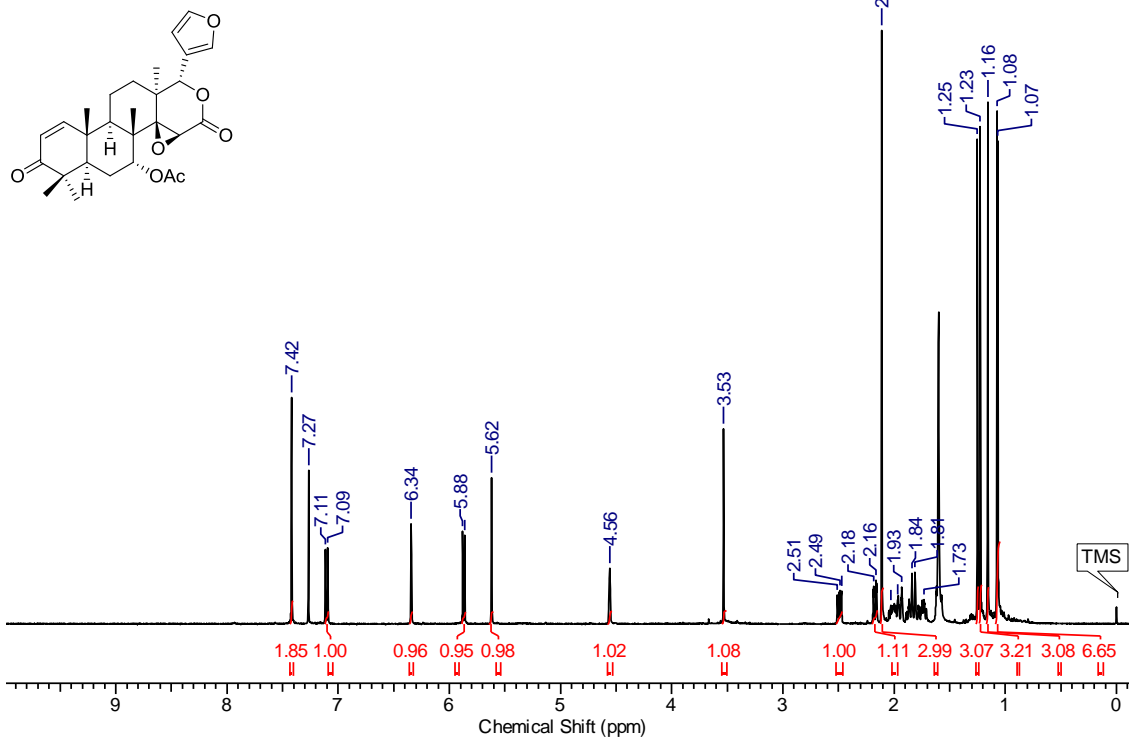

Gedunin\_13C.ESP

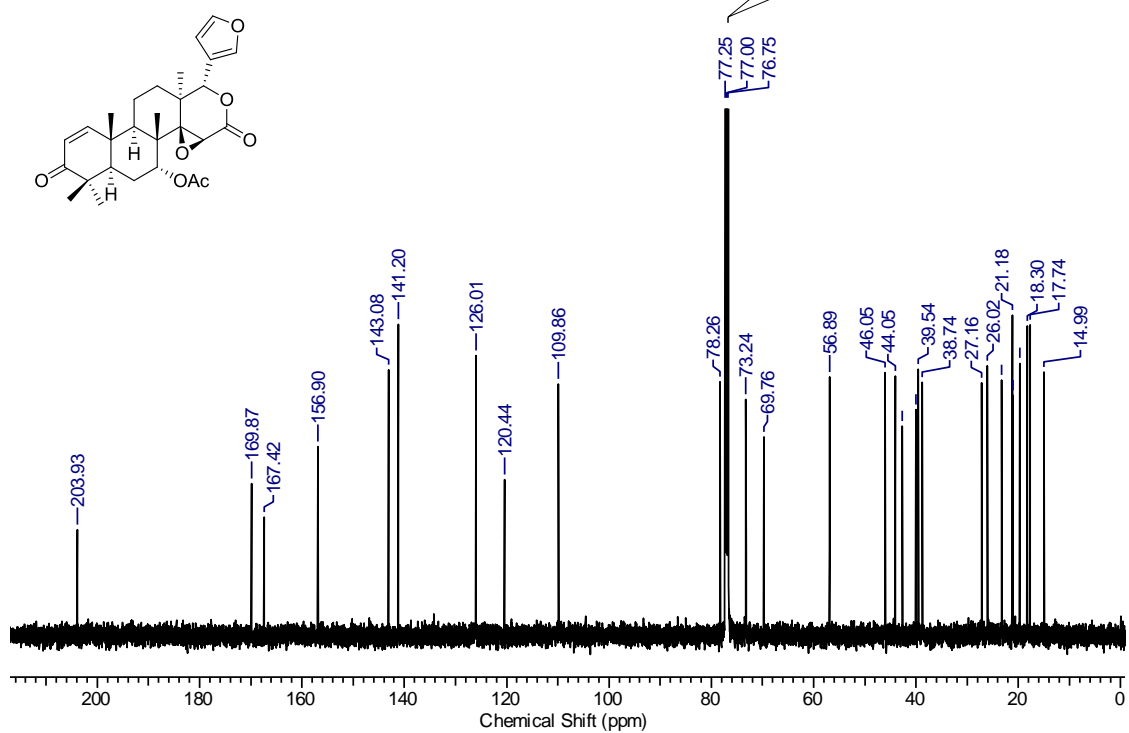

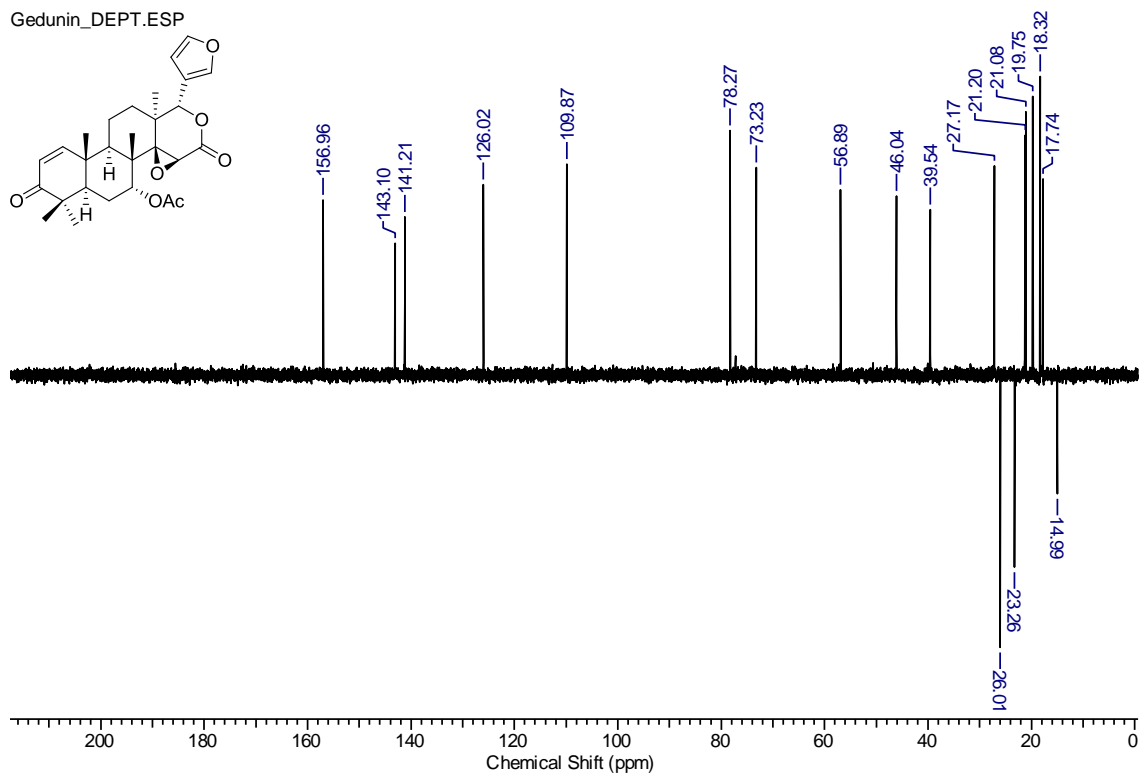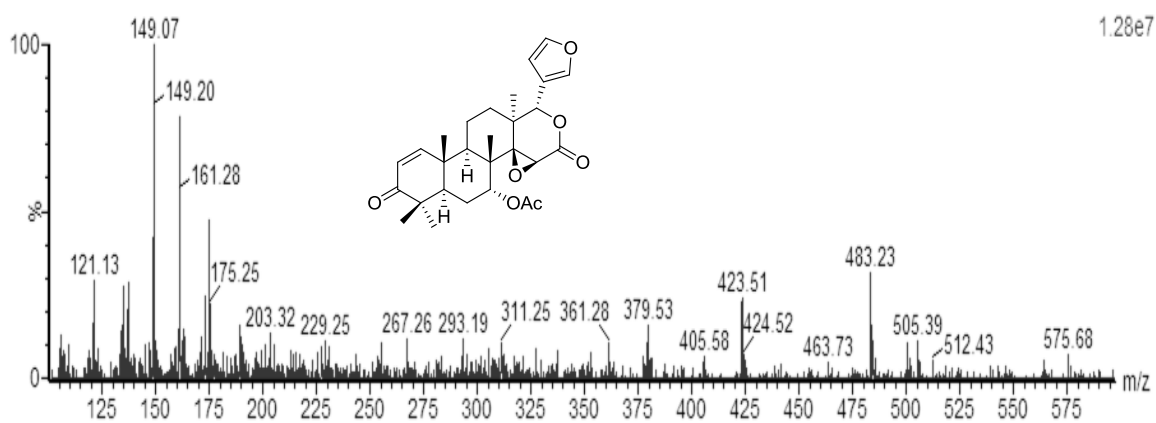



## 12 $\beta$ -Hydroxygedunin (20)

12OH Gedunin\_1H.ESP

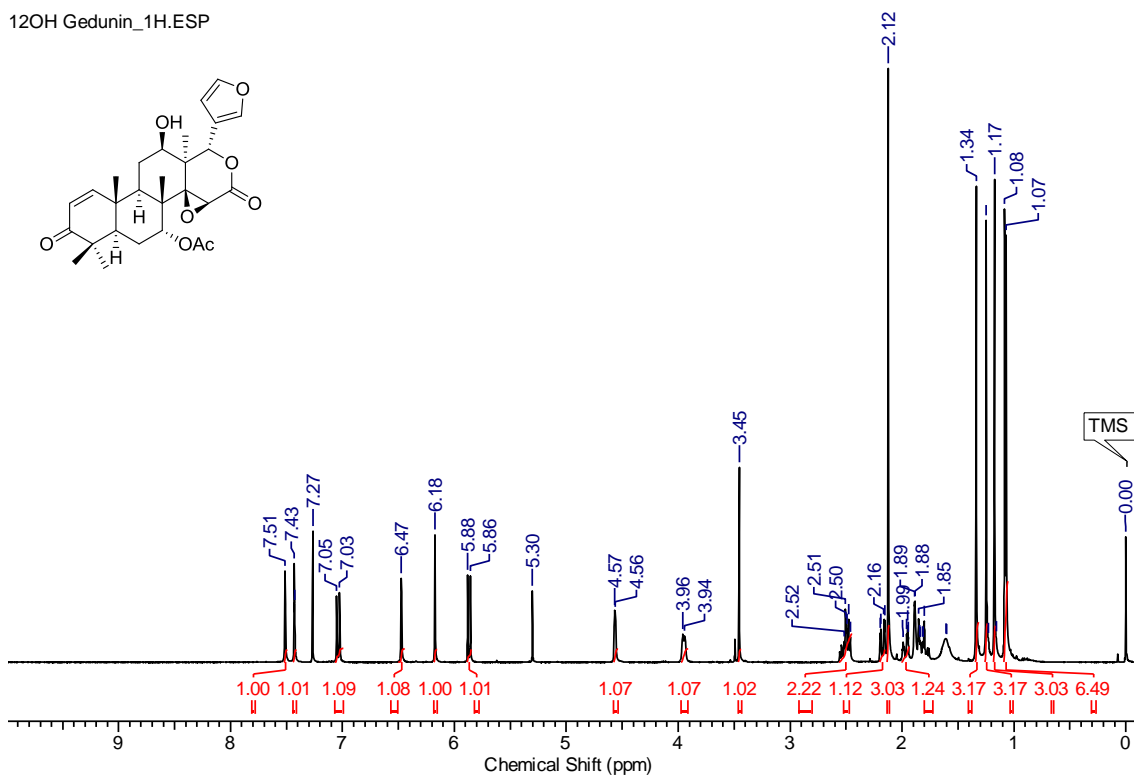

12OH Gedunin\_13C.ESP

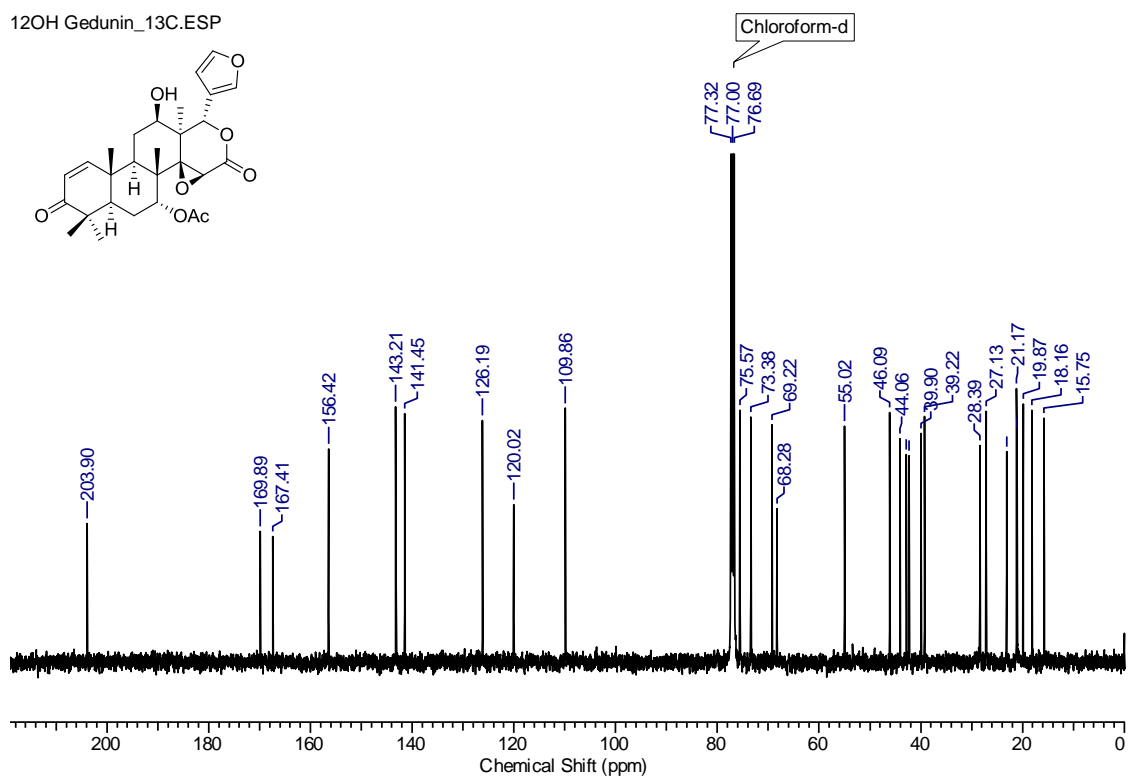

12OH Gedunin\_DEPT.ESP

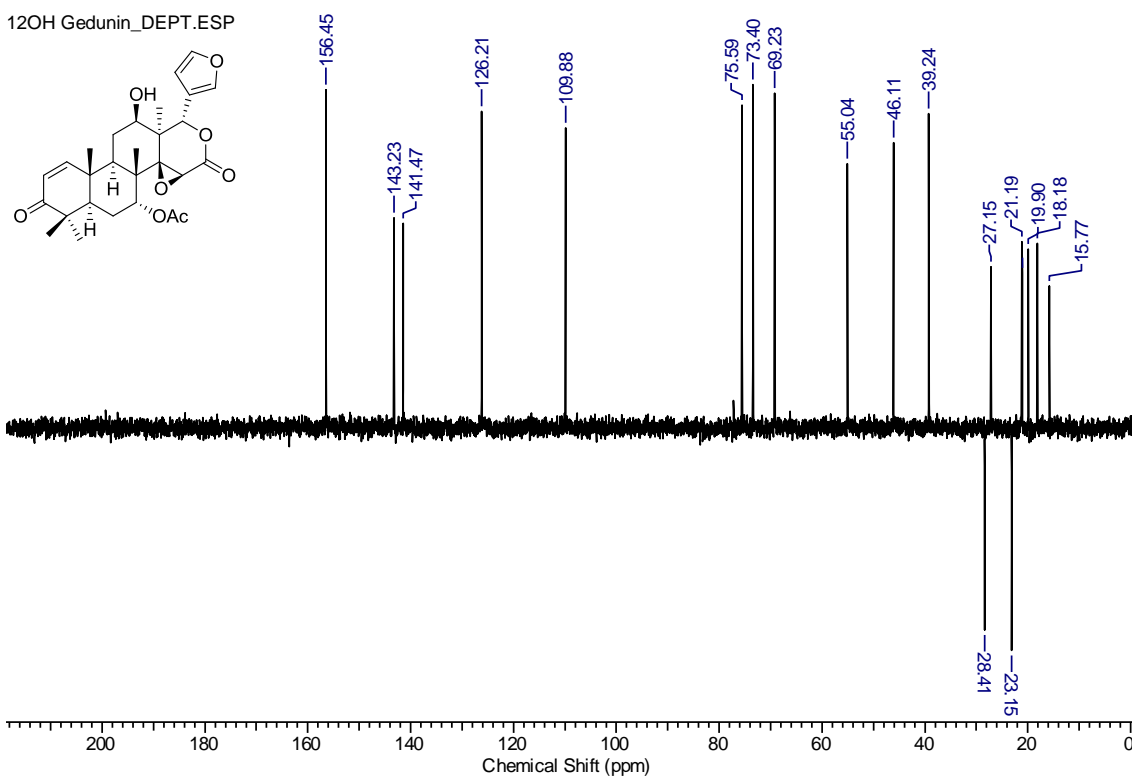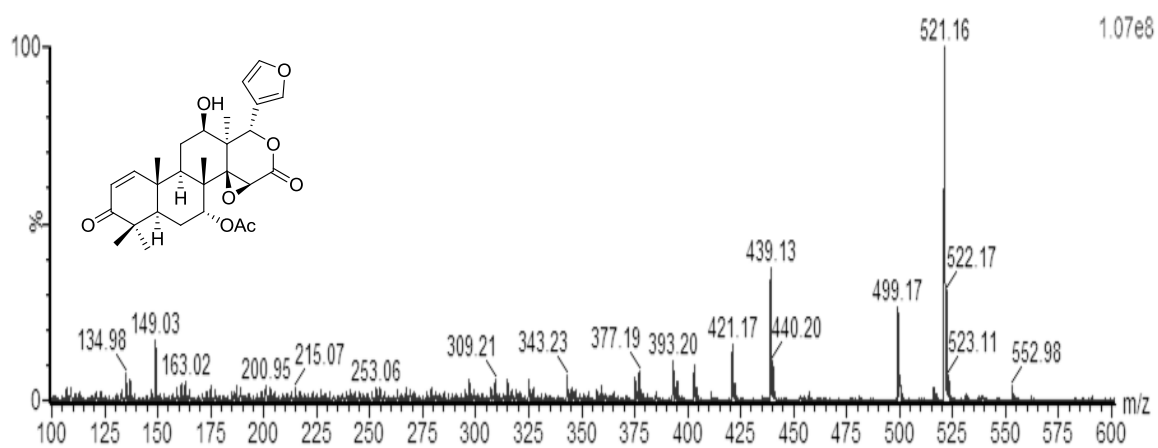

Supplement: c3gc40193f.pdf [file c3gc40193f.pdf]
